# Supplementary material for: A comparison of intestinal microbiota in a population of low-risk infants exposed and not exposed to intrapartum antibiotics: The Baby & Microbiota of the Intestine cohort study protocol
Source: Springer Nature journal article supplement (doi:10.1186/s12887-016-0724-5), 2016-11-10
Supplement: MOESM1 [file 11034660]

**ELIGIBILITY ASSESSMENT**

**Instructions:**

- **This form is to be completed by research personnel prior to enrolment.**

Date of eligibility assessment:     /   /    
year month day

1. Are you planning to have a vaginal birth?  
 No → **ineligible**  
 Yes
  
2. Are you having a single baby (not twins or triplets)?  
 No → **ineligible**  
 Yes
  
3. Are you able to communicate in English?  
 No → **ineligible**  
 Yes

Does this woman meet all study eligibility criteria by answering “Yes” to all of the questions above?  
 Yes → **eligible to enroll**  
 No

Did this woman sign their Patient Informed Consent form, including date and witness signature?  
 Yes  
 No → **do not enroll**

**Person must first meet all study eligibility criteria and sign consent form, before receiving Participant ID (PID). Obtain PID from Study Participant Tracking Sheet.**

Participant ID:   -

**BASELINE INFORMATION**

**Instructions:**

- This form is to be completed by study participants at enrolment.
- Mark only one box with an "X" for each question, unless instructed to do otherwise.
- If you do not understand a question, please ask a research staff member.
- All of your answers will remain confidential.

1. What is today's date?     /   /    
 year month day

2. What is your expected date of birth?     /   /    
 year month day

3. What was your weight just before this pregnancy?    lbs or    kg

4. Have you been regularly exposed to other people's tobacco smoke during your pregnancy? (regularly is defined as most days or nights)

- No
- Yes

→ if yes, **not counting yourself**, how many people who live in your household smoke regularly?

people

→ if yes, do people smoke regularly in the room where you work?

- No
- Yes

→ if yes, how many hours per day are you exposed to other people's tobacco smoke in total (at home, at work and elsewhere)?

hours

5. Do you smoke cigarettes?

- Never smoked
- Smoked prior to pregnancy, but not now
- Smoked earlier in pregnancy, but not now
- Current smoker

↳ if you are a current smoker, how many cigarettes do you usually smoke per day?

cigarettes per day

**BASELINE INFORMATION**

6. Do you, your baby's father or your other child/children (if applicable) have any of the following: (check all that apply)

|                                                      | <u>YOURSELF</u>          |                          |                          | <u>FATHER OF BABY</u>    |                          |                          | <u>YOUR CHILD/ CHILDREN</u> |                          |                          |
|------------------------------------------------------|--------------------------|--------------------------|--------------------------|--------------------------|--------------------------|--------------------------|-----------------------------|--------------------------|--------------------------|
|                                                      | No                       | Yes                      | Unknown                  | No                       | Yes                      | Unknown                  | None                        | Yes, 1 or more children  | Unknown                  |
| Asthma, wheezing                                     | <input type="checkbox"/> | <input type="checkbox"/> | <input type="checkbox"/> | <input type="checkbox"/> | <input type="checkbox"/> | <input type="checkbox"/> | <input type="checkbox"/>    | <input type="checkbox"/> | <input type="checkbox"/> |
| Eczema                                               | <input type="checkbox"/> | <input type="checkbox"/> | <input type="checkbox"/> | <input type="checkbox"/> | <input type="checkbox"/> | <input type="checkbox"/> | <input type="checkbox"/>    | <input type="checkbox"/> | <input type="checkbox"/> |
| Seasonal allergies                                   | <input type="checkbox"/> | <input type="checkbox"/> | <input type="checkbox"/> | <input type="checkbox"/> | <input type="checkbox"/> | <input type="checkbox"/> | <input type="checkbox"/>    | <input type="checkbox"/> | <input type="checkbox"/> |
| Food allergies                                       | <input type="checkbox"/> | <input type="checkbox"/> | <input type="checkbox"/> | <input type="checkbox"/> | <input type="checkbox"/> | <input type="checkbox"/> | <input type="checkbox"/>    | <input type="checkbox"/> | <input type="checkbox"/> |
| Other allergies                                      | <input type="checkbox"/> | <input type="checkbox"/> | <input type="checkbox"/> | <input type="checkbox"/> | <input type="checkbox"/> | <input type="checkbox"/> | <input type="checkbox"/>    | <input type="checkbox"/> | <input type="checkbox"/> |
| Diabetes                                             | <input type="checkbox"/> | <input type="checkbox"/> | <input type="checkbox"/> | <input type="checkbox"/> | <input type="checkbox"/> | <input type="checkbox"/> | <input type="checkbox"/>    | <input type="checkbox"/> | <input type="checkbox"/> |
| High blood pressure                                  | <input type="checkbox"/> | <input type="checkbox"/> | <input type="checkbox"/> | <input type="checkbox"/> | <input type="checkbox"/> | <input type="checkbox"/> | <input type="checkbox"/>    | <input type="checkbox"/> | <input type="checkbox"/> |
| Heart disease (heart attack, angina, bypass surgery) | <input type="checkbox"/> | <input type="checkbox"/> | <input type="checkbox"/> | <input type="checkbox"/> | <input type="checkbox"/> | <input type="checkbox"/> | <input type="checkbox"/>    | <input type="checkbox"/> | <input type="checkbox"/> |
| Obesity or overweight                                | <input type="checkbox"/> | <input type="checkbox"/> | <input type="checkbox"/> | <input type="checkbox"/> | <input type="checkbox"/> | <input type="checkbox"/> | <input type="checkbox"/>    | <input type="checkbox"/> | <input type="checkbox"/> |

7. Please list any medications, health products (including vitamins, probiotics, supplements and nicotine replacement therapies like "the patch"), alcohol or street drugs that you have taken during this pregnancy.

None

| <u>Name</u> | <u>When during this pregnancy?</u><br>(check both if it applies) |                          |
|-------------|------------------------------------------------------------------|--------------------------|
|             | <b>Before 20 weeks</b>                                           | <b>After 20 weeks</b>    |
| a. _____    | <input type="checkbox"/>                                         | <input type="checkbox"/> |
| b. _____    | <input type="checkbox"/>                                         | <input type="checkbox"/> |
| c. _____    | <input type="checkbox"/>                                         | <input type="checkbox"/> |
| d. _____    | <input type="checkbox"/>                                         | <input type="checkbox"/> |
| e. _____    | <input type="checkbox"/>                                         | <input type="checkbox"/> |
| f. _____    | <input type="checkbox"/>                                         | <input type="checkbox"/> |

PID:   -

Mother's Date of Birth:

/   /    
 year month day

**BASELINE INFORMATION UPDATE**

**Instructions:**

- This form is to be completed by research personnel through telephone contact with participants.
- Refer to the participant's Baseline Form for Question #9.
- Participants who were less than 36 weeks, 0 days gestation at enrolment are to be contacted between 36 weeks, 0 days gestation and 36 weeks, 6 days gestation (inclusive).

1. Was the baseline information update done?

- No, because the participant was enrolled at or after 36 weeks, 0 days gestation
- No, because the participant could not be contacted
- Yes

2. Date of phone call:

/   /    
 year month day

3. Are you still pregnant?

- No → **ineligible for further follow-up**
- Yes

4. Are you still planning to have a vaginal birth?

- No → **ineligible for further follow-up**
- Yes

5. Are you having a single baby (not twins or triplets)?

- No → **ineligible for further follow-up**
- Yes

6. Is a midwife still your primary care provider?

- No → **ineligible for further follow-up**
- Yes

**Script if they answer "no" to any of questions 3, 4, 5 or 6:**

**Researcher:** "Ok that is all I need to know from you today. This study is going to continue to follow women after their births if they are not pre-term, planning a C-section, having multiples or high risk, so at this point, you have already provided us with as much information as we need. We really appreciate your participation in our study—thank you so much for your time. Do you have any questions for me?"

PID:

|  |  |   |  |  |  |
|--|--|---|--|--|--|
|  |  | - |  |  |  |
|--|--|---|--|--|--|

Mother's Date of Birth:

|      |  |  |  |       |  |     |  |
|------|--|--|--|-------|--|-----|--|
|      |  |  |  |       |  |     |  |
| year |  |  |  | month |  | day |  |

**BASELINE INFORMATION UPDATE**

---

7. Have you been regularly exposed to other people's tobacco smoke during your pregnancy? (regularly is defined as most days or nights)

No

Yes

→ if yes, **not counting yourself**, how many people who live in your household smoke regularly?

|  |  |
|--|--|
|  |  |
|--|--|

people

→ if yes, do people smoke regularly in the room where you work?

No

Yes

→ if yes, how many hours per day are you exposed to other people's tobacco smoke in total (at home, at work and elsewhere)?

|  |  |
|--|--|
|  |  |
|--|--|

hours

8. Do you smoke cigarettes?

Never smoked

Smoked prior to pregnancy, but not now

Smoked earlier in pregnancy, but not now

Current smoker

↳ if you are a current smoker, how many cigarettes do you usually smoke per day?

|  |  |
|--|--|
|  |  |
|--|--|

cigarettes per day

PID:

|  |  |   |  |  |
|--|--|---|--|--|
|  |  | - |  |  |
|--|--|---|--|--|

Mother's Date of Birth:

|      |  |  |  |       |  |     |
|------|--|--|--|-------|--|-----|
|      |  |  |  |       |  |     |
| year |  |  |  | month |  | day |

**BASELINE INFORMATION UPDATE**

---

9. Please list any medications, health products (including vitamins, probiotics, supplements and nicotine replacement therapies like "the patch"), alcohol or street drugs that you have taken during this pregnancy ***and not told us about yet***. **Note to interviewer:** refer to Baseline Form to review previously reported health products.

None

When during this pregnancy?  
(check both if it applies)

| <u>Name</u> | <b>Before 20 weeks</b>   | <b>After 20 weeks</b>    |
|-------------|--------------------------|--------------------------|
| a. _____    | <input type="checkbox"/> | <input type="checkbox"/> |
| b. _____    | <input type="checkbox"/> | <input type="checkbox"/> |
| c. _____    | <input type="checkbox"/> | <input type="checkbox"/> |
| d. _____    | <input type="checkbox"/> | <input type="checkbox"/> |
| e. _____    | <input type="checkbox"/> | <input type="checkbox"/> |
| f. _____    | <input type="checkbox"/> | <input type="checkbox"/> |

**BIRTH**

**Instructions:**

- This form is to be completed by the midwives using the birth record, nursing notes and newborn admission forms as needed.

1. Maternal height:  feet,   inches or    cm

Date of last prenatal visit:     /   /    
 year month day

2. Maternal weight at last prenatal visit:    lbs or    .  kg

3. Gravida:

4. Term:

5. Premature:

6. Abortuses:

7. Living:

8. Was a 50 g oral glucose challenge test done?

- No
- Yes

↳ if yes, what were the test results?

60 minutes:   .  mmol/L  not done

9. Was a 75 g oral glucose tolerance test done?

- No
- Yes

↳ if yes, what were the test results?

Fasting:   .  mmol/L  not done

60 minutes:   .  mmol/L  not done

120 minutes:   .  mmol/L  not done

|  |  |   |  |  |
|--|--|---|--|--|
|  |  | - |  |  |
|--|--|---|--|--|

|      |  |  |  |       |  |     |  |
|------|--|--|--|-------|--|-----|--|
|      |  |  |  |       |  |     |  |
| year |  |  |  | month |  | day |  |

**BIRTH**

---

10. Was GBS screening performed?

- Unknown
- No
  - ↳ if no, was there a reason to treat with GBS prophylaxis?
    - No
    - Yes – GBS bacteriuria
    - Yes – previous baby with GBS septicemia
- Yes
  - ↳ if yes, what was the test result?
    - Positive
    - Negative
    - Unknown

11. Actual place of birth

- Hospital
- Home
- Other: \_\_\_\_\_

12. Were any of the following antenatal risk factors present? (check all that apply)

- None
- Large for gestational age
- Small for gestational age
- Intrauterine growth restriction
- PROM
- PPRM
- Pre-eclampsia
- Gestational hypertension
- Other: \_\_\_\_\_

13. Were any maternal antibiotics administered during the intrapartum period prior to the baby being born?

- No
- Yes
  - ↳ if yes, please complete the table on the following page.



PID:  -

Mother's Date of Birth:  year  month  day

**BIRTH**

If antibiotics were administered, please indicate the following for each drug:

**DRUG 1**

- Indication:**
- Caesarean section
  - GBS prophylaxis
  - Signs and symptoms of maternal infection
  - Other: \_\_\_\_\_

- Drug:**
- Penicillin G
  - Cefazolin
  - Clindamycin
  - Erythromycin
  - Ampicillin
  - Vancomycin
  - Other: \_\_\_\_\_

**Dosage:**

Dose 1 \_\_\_\_\_

Dose 2 \_\_\_\_\_

Dose 3 \_\_\_\_\_

Dose 4 \_\_\_\_\_

Dose 5 \_\_\_\_\_

**Date and time:**

/  /  :   
year month day 24 hour clock

/  /  :

/  /  :

/  /  :

/  /  :

**Route**

IV  Oral

**DRUG 2**  N/A

- Indication:**
- Caesarean section
  - GBS prophylaxis
  - Signs and symptoms of maternal infection
  - Other: \_\_\_\_\_

- Drug:**
- Penicillin G
  - Cefazolin
  - Clindamycin
  - Erythromycin
  - Ampicillin
  - Vancomycin
  - Other: \_\_\_\_\_

**Dosage:**

Dose 1 \_\_\_\_\_

Dose 2 \_\_\_\_\_

Dose 3 \_\_\_\_\_

Dose 4 \_\_\_\_\_

Dose 5 \_\_\_\_\_

**Date and time:**

/  /  :   
year month day 24 hour clock

/  /  :

/  /  :

/  /  :

/  /  :

**Route**

IV  Oral

PID:   -

Mother's Date of Birth:          
 year month day

**BIRTH**

**DRUG 3**  N/A

**Indication:**

- Caesarean section
- GBS prophylaxis
- Signs and symptoms of maternal infection
- Other:  
\_\_\_\_\_

**Drug:**

- Penicillin G
- Cefazolin
- Clindamycin
- Erythromycin
- Ampicillin
- Vancomycin
- Other:  
\_\_\_\_\_

|               |       | <b>Dosage:</b> | <b>Date and time:</b>                                                                                                                                                                                        | <b>Route</b>                                                                                                          |                                                           |
|---------------|-------|----------------|--------------------------------------------------------------------------------------------------------------------------------------------------------------------------------------------------------------|-----------------------------------------------------------------------------------------------------------------------|-----------------------------------------------------------|
| <b>Dose 1</b> | _____ | _____          | <input type="text"/> <input type="text"/> <input type="text"/> <input type="text"/> / <input type="text"/> <input type="text"/> / <input type="text"/> <input type="text"/><br><small>year month day</small> | <input type="text"/> <input type="text"/> : <input type="text"/> <input type="text"/><br><small>24 hour clock</small> | IV <input type="checkbox"/> Oral <input type="checkbox"/> |
| <b>Dose 2</b> | _____ | _____          | <input type="text"/> <input type="text"/> <input type="text"/> <input type="text"/> / <input type="text"/> <input type="text"/> / <input type="text"/> <input type="text"/><br><small>year month day</small> | <input type="text"/> <input type="text"/> : <input type="text"/> <input type="text"/><br><small>24 hour clock</small> | IV <input type="checkbox"/> Oral <input type="checkbox"/> |
| <b>Dose 3</b> | _____ | _____          | <input type="text"/> <input type="text"/> <input type="text"/> <input type="text"/> / <input type="text"/> <input type="text"/> / <input type="text"/> <input type="text"/><br><small>year month day</small> | <input type="text"/> <input type="text"/> : <input type="text"/> <input type="text"/><br><small>24 hour clock</small> | IV <input type="checkbox"/> Oral <input type="checkbox"/> |
| <b>Dose 4</b> | _____ | _____          | <input type="text"/> <input type="text"/> <input type="text"/> <input type="text"/> / <input type="text"/> <input type="text"/> / <input type="text"/> <input type="text"/><br><small>year month day</small> | <input type="text"/> <input type="text"/> : <input type="text"/> <input type="text"/><br><small>24 hour clock</small> | IV <input type="checkbox"/> Oral <input type="checkbox"/> |
| <b>Dose 5</b> | _____ | _____          | <input type="text"/> <input type="text"/> <input type="text"/> <input type="text"/> / <input type="text"/> <input type="text"/> / <input type="text"/> <input type="text"/><br><small>year month day</small> | <input type="text"/> <input type="text"/> : <input type="text"/> <input type="text"/><br><small>24 hour clock</small> | IV <input type="checkbox"/> Oral <input type="checkbox"/> |

**DRUG 4**  N/A

**Indication:**

- Caesarean section
- GBS prophylaxis
- Signs and symptoms of maternal infection
- Other:  
\_\_\_\_\_

**Drug:**

- Penicillin G
- Cefazolin
- Clindamycin
- Erythromycin
- Ampicillin
- Vancomycin
- Other:  
\_\_\_\_\_

|               |       | <b>Dosage:</b> | <b>Date and time:</b>                                                                                                                                                                                        | <b>Route</b>                                                                                                          |                                                           |
|---------------|-------|----------------|--------------------------------------------------------------------------------------------------------------------------------------------------------------------------------------------------------------|-----------------------------------------------------------------------------------------------------------------------|-----------------------------------------------------------|
| <b>Dose 1</b> | _____ | _____          | <input type="text"/> <input type="text"/> <input type="text"/> <input type="text"/> / <input type="text"/> <input type="text"/> / <input type="text"/> <input type="text"/><br><small>year month day</small> | <input type="text"/> <input type="text"/> : <input type="text"/> <input type="text"/><br><small>24 hour clock</small> | IV <input type="checkbox"/> Oral <input type="checkbox"/> |
| <b>Dose 2</b> | _____ | _____          | <input type="text"/> <input type="text"/> <input type="text"/> <input type="text"/> / <input type="text"/> <input type="text"/> / <input type="text"/> <input type="text"/><br><small>year month day</small> | <input type="text"/> <input type="text"/> : <input type="text"/> <input type="text"/><br><small>24 hour clock</small> | IV <input type="checkbox"/> Oral <input type="checkbox"/> |
| <b>Dose 3</b> | _____ | _____          | <input type="text"/> <input type="text"/> <input type="text"/> <input type="text"/> / <input type="text"/> <input type="text"/> / <input type="text"/> <input type="text"/><br><small>year month day</small> | <input type="text"/> <input type="text"/> : <input type="text"/> <input type="text"/><br><small>24 hour clock</small> | IV <input type="checkbox"/> Oral <input type="checkbox"/> |
| <b>Dose 4</b> | _____ | _____          | <input type="text"/> <input type="text"/> <input type="text"/> <input type="text"/> / <input type="text"/> <input type="text"/> / <input type="text"/> <input type="text"/><br><small>year month day</small> | <input type="text"/> <input type="text"/> : <input type="text"/> <input type="text"/><br><small>24 hour clock</small> | IV <input type="checkbox"/> Oral <input type="checkbox"/> |
| <b>Dose 5</b> | _____ | _____          | <input type="text"/> <input type="text"/> <input type="text"/> <input type="text"/> / <input type="text"/> <input type="text"/> / <input type="text"/> <input type="text"/><br><small>year month day</small> | <input type="text"/> <input type="text"/> : <input type="text"/> <input type="text"/><br><small>24 hour clock</small> | IV <input type="checkbox"/> Oral <input type="checkbox"/> |

**BIRTH**

14. Did the **mother** receive any antibiotics **after** the baby was born and **prior** to hospital discharge?

- No
- Yes

↳ if yes, please complete the following table:

**DRUG 1**

Primary indication: \_\_\_\_\_

Drug: \_\_\_\_\_

Dosage: \_\_\_\_\_

Route:  IV  Oral  Other: \_\_\_\_\_

Start date and time:     /   /   :    
 year month day 24 hour clock

Stop date and time:     /   /   :    
 year month day 24 hour clock

**DRUG 2**  N/A

Primary indication: \_\_\_\_\_

Drug: \_\_\_\_\_

Dosage: \_\_\_\_\_

Route:  IV  Oral  Other: \_\_\_\_\_

Start date and time:     /   /   :    
 year month day 24 hour clock

Stop date and time:     /   /   :    
 year month day 24 hour clock

**BIRTH**

15. Date and time of rupture of membranes:

/   /    
 year month day

:    
 24 hour clock

unknown

16. Date and time of birth:

/   /    
 year month day

:    
 24 hour clock

17. Presentation at delivery:

- Cephalic
- Breech
- Transverse/oblique
- Unknown

18. Mode of delivery:

- Vaginal
- Caesarean section without labour
- Caesarean section with labour

↳ if Caesarean section with labour, what was the dilation at time of CS?   cm

19. Status of baby at birth:

- Alive
- Stillborn

20. Gender:

- Male
- Female
- Ambiguous

21. Apgar score: at 1 minute:   at 5 minutes:

22. Birthweight:     grams

23. Length:   .  cm

24. Head circumference:   .  cm

**BIRTH**

---

25. Was the baby admitted to the NICU or ICU?

No

Yes

→ if yes, what was the date and time of admission?

//   //        :    
 year                      month                      day                      24 hour clock

→ if yes, what was the date and time of discharge?

//   //        :    
 year                      month                      day                      24 hour clock

26. Was the baby tested for hypoglycemia?

No

Yes

↳ if yes, were any glucose values less than 3.0 mmol/L?

No

Yes

**BIRTH**

27. Did the **baby** receive any antibiotics prior to discharge **other than** erythromycin prophylactic eye ointment?

No

Yes,

↳ if yes, please complete the following table:

**DRUG 1**

Primary indication: \_\_\_\_\_

Drug: \_\_\_\_\_

Dosage: \_\_\_\_\_

Route:  IV  Other: \_\_\_\_\_

Start date and time:

/   /   :    
 year month day 24 hour clock

Stop date and time:

/   /   :    
 year month day 24 hour clock

**DRUG 2**  N/A

Primary indication: \_\_\_\_\_

Drug: \_\_\_\_\_

Dosage: \_\_\_\_\_

Route:  IV  Other: \_\_\_\_\_

Start date and time:

/   /   :    
 year month day 24 hour clock

Stop date and time:

/   /   :    
 year month day 24 hour clock

PID:

|  |  |   |  |  |  |  |
|--|--|---|--|--|--|--|
|  |  | - |  |  |  |  |
|--|--|---|--|--|--|--|

Mother's Date of Birth:

|      |  |  |  |       |  |     |  |
|------|--|--|--|-------|--|-----|--|
|      |  |  |  |       |  |     |  |
| year |  |  |  | month |  | day |  |

**BIRTH**

---

28. What was the baby fed at first feeding?

- Breast milk
- Formula
- Other: \_\_\_\_\_
- Unknown

29. Was the baby fed any formula during hospital stay?

- No hospital stay
- No formula fed during hospital stay
- Yes formula fed during hospital stay
- Unknown

30. Date/ time of discharge of mother from hospital or midwife leaving home:

|      |  |  |  |   |       |  |   |     |  |               |  |   |  |  |
|------|--|--|--|---|-------|--|---|-----|--|---------------|--|---|--|--|
|      |  |  |  | / |       |  | / |     |  |               |  | : |  |  |
| year |  |  |  |   | month |  |   | day |  | 24 hour clock |  |   |  |  |

31. Date/ time of discharge of baby from hospital or midwife leaving home:

|      |  |  |  |   |       |  |   |     |  |               |  |   |  |  |
|------|--|--|--|---|-------|--|---|-----|--|---------------|--|---|--|--|
|      |  |  |  | / |       |  | / |     |  |               |  | : |  |  |
| year |  |  |  |   | month |  |   | day |  | 24 hour clock |  |   |  |  |

PID:

|  |  |   |  |  |  |
|--|--|---|--|--|--|
|  |  | - |  |  |  |
|--|--|---|--|--|--|

Mother's Date of Birth:

|      |  |  |  |       |  |     |  |
|------|--|--|--|-------|--|-----|--|
|      |  |  |  |       |  |     |  |
| year |  |  |  | month |  | day |  |

**Additional birth information**

**Instructions:**

- This form is to be completed by research personnel by telephone or in person at 12 weeks or the earliest contact postpartum (after June 15, 2015).

1. Date: 

|  |  |  |  |
|--|--|--|--|
|  |  |  |  |
|--|--|--|--|

 / 

|  |  |
|--|--|
|  |  |
|--|--|

 / 

|  |  |
|--|--|
|  |  |
|--|--|

year                      month                      day

2. When you were in labour, did you spend any time immersed in water?

- No
- Yes
  - ↳ if yes, was your baby born in water?
    - No
    - Yes

3. During your baby's first 3 months of life, were there other children living in your home (part-time or full-time)?

- No
- Yes
  - ↳ if yes, how many?
    - |  |  |
|--|--|
|  |  |
|--|--|

 children
  - ↳ if yes, how many of the children attended school or daycare outside of your home during your baby's first 3 months?
    - |  |  |
|--|--|
|  |  |
|--|--|

 children



**Day 3**

**Instructions:**

- This form is to be completed when your baby is **3 days old**.
- Mark only one box with an "X" for each question, unless instructed to do otherwise.
- Please use your study calendar to help you remember the information asked for.
- All of your answers will remain confidential.
- If you do not understand a question, please ask a research staff member by calling 905-525-9140 ext 22146 or by emailing babyandmistudy@gmail.com.
- Please return this form when you visit McMaster University Medical Center for your first study visit.

1. What is today's date?     /   /    
 year month day

2. How much did your baby weigh at your most recent visit with your midwife or doctor?  
    grams or   lbs,   oz or  I don't know

3. Have you **ever** breast fed your baby?

No

Yes

↳ if yes, **do you still** breastfeed your baby?

No

↳ if no, how old was your baby when you stopped breast feeding?

days

Yes

↳ if yes, has your baby **ever** had anything other than breast milk or water?

No

Yes

↳ if yes, how old was your baby when she or he first had anything other than breast milk or water?

days

PID:

|  |  |   |  |  |  |
|--|--|---|--|--|--|
|  |  | - |  |  |  |
|--|--|---|--|--|--|

Mother's Date of Birth:

|  |  |  |  |  |  |  |  |
|--|--|--|--|--|--|--|--|
|  |  |  |  |  |  |  |  |
|--|--|--|--|--|--|--|--|

year

month

day

**Day 3**

---

4. Has your baby **ever** had any of the following?

|                                  | No                       | Yes                      |
|----------------------------------|--------------------------|--------------------------|
| Formula                          | <input type="checkbox"/> | <input type="checkbox"/> |
| Soy milk                         | <input type="checkbox"/> | <input type="checkbox"/> |
| Goat's milk                      | <input type="checkbox"/> | <input type="checkbox"/> |
| Hypo-allergenic formula          | <input type="checkbox"/> | <input type="checkbox"/> |
| Cow's milk                       | <input type="checkbox"/> | <input type="checkbox"/> |
| Another type of milk or formula: | <input type="checkbox"/> | <input type="checkbox"/> |

---

5. **Since you and your baby have been home**, has your baby needed to stay in the hospital?

- No
- Yes

**Day 3**

6. **Since you and your baby have been home**, has **your baby** had an infection that required antibiotic or antifungal (anti-yeast) treatment?

- No
- Yes → if yes, please complete the following table:

**DRUG 1**

**What was the type of infection?**  Thrush  Ear infection  Chest infection  
 Urinary tract infection  Other: \_\_\_\_\_

**What was the name of the drug?** \_\_\_\_\_

**How was it given?**  Topical  Oral  Other: \_\_\_\_\_

**What was the start date?**     /   /    
 year month day

**What was the end date?**     /   /   or  Still currently in use

**DRUG 2**  Only one drug was given. (Do not complete the rest of the table)

**What was the type of infection?**  Thrush  Ear infection  Chest infection  
 Urinary tract infection  Other: \_\_\_\_\_

**What was the name of the second drug?** \_\_\_\_\_

**How was it given?**  Topical  Oral  Other: \_\_\_\_\_

**What was the start date?**     /   /    
 year month day

**What was the end date?**     /   /   or  Still currently in use

PID:

|  |  |   |  |  |
|--|--|---|--|--|
|  |  | - |  |  |
|--|--|---|--|--|

Mother's Date of Birth:

|  |  |  |  |
|--|--|--|--|
|  |  |  |  |
|--|--|--|--|

year

|  |  |
|--|--|
|  |  |
|--|--|

month

|  |  |
|--|--|
|  |  |
|--|--|

day

**Day 3**

---

7. Please list any other medications, vitamins, homeopathics or supplements that ***your baby*** has taken ***since birth***.

None

| <u>Medication, vitamin or supplement name</u> | <u>Currently in Use?</u> |                          |
|-----------------------------------------------|--------------------------|--------------------------|
|                                               | <b>No</b>                | <b>Yes</b>               |
| a. _____                                      | <input type="checkbox"/> | <input type="checkbox"/> |
| b. _____                                      | <input type="checkbox"/> | <input type="checkbox"/> |
| c. _____                                      | <input type="checkbox"/> | <input type="checkbox"/> |
| d. _____                                      | <input type="checkbox"/> | <input type="checkbox"/> |
| e. _____                                      | <input type="checkbox"/> | <input type="checkbox"/> |

PID:   -

Mother's Date of Birth:

year month day

**Day 3**

8. *Since you and your baby have been home*, have *you* taken any antibiotic or antifungal (anti-yeast) medications?

- No
- Yes → if yes, please complete the following table:

**DRUG 1**

What was the name of the drug? \_\_\_\_\_

How was it given?  Topical  Oral  Other: \_\_\_\_\_

What was the start date?     /   /

year month day

What was the end date?     /   /   or  Still currently in use

year month day

**DRUG 2**  Only one drug was taken. (Do not complete the rest of the table)

What was the name of the second drug? \_\_\_\_\_

How was it given?  Topical  Oral  Other: \_\_\_\_\_

What was the start date?     /   /

year month day

What was the end date?     /   /   or  Still currently in use

year month day

PID:

|  |  |   |  |  |
|--|--|---|--|--|
|  |  | - |  |  |
|--|--|---|--|--|

Mother's Date of Birth:

|  |  |  |  |
|--|--|--|--|
|  |  |  |  |
|--|--|--|--|

year

|  |  |
|--|--|
|  |  |
|--|--|

month

|  |  |
|--|--|
|  |  |
|--|--|

day

**Day 3**

---

9. ***If you are currently breastfeeding***, please list any other prescription medications that ***you*** have taken ***since your baby was born***.

Not currently breastfeeding

None

Medication name

Currently in Use?

**No**

**Yes**

a. \_\_\_\_\_



b. \_\_\_\_\_



c. \_\_\_\_\_



d. \_\_\_\_\_



e. \_\_\_\_\_

**DAY 10**

**Instructions:**

- This form is to be completed when your baby is **10 days old**.
- Mark only one box with an "X" for each question, unless instructed to do otherwise.
- Please use your study calendar to help you remember the information asked for.
- All of your answers will remain confidential.
- If you do not understand a question, please ask a research staff member by calling 905-525-9140 ext 22146 or by emailing babyandmistudy@gmail.com.
- Please return this form when you visit McMaster University Medical Center for your first study visit.

1. What is today's date?     /   /    
 year month day

2. How much did your baby weigh at your most recent visit with your midwife or doctor?  
    grams or   lbs,   oz or  I don't know

3. Have you **ever** breast fed your baby?

No

Yes

↳ if yes, **do you still** breastfeed your baby?

No

↳ if no, how old was your baby when you stopped breast feeding?

days

Yes

↳ if yes, has your baby **ever** had anything other than breast milk or water?

No

Yes

↳ if yes, how old was your baby when she or he first had anything other than breast milk or water?

days

PID:

|  |  |   |  |  |  |
|--|--|---|--|--|--|
|  |  | - |  |  |  |
|--|--|---|--|--|--|

Mother's Date of Birth:

|  |  |  |  |
|--|--|--|--|
|  |  |  |  |
|--|--|--|--|

year

|  |  |
|--|--|
|  |  |
|--|--|

month

|  |  |
|--|--|
|  |  |
|--|--|

day

**DAY 10**

---

4. Has your baby **ever** had any of the following?

|                                  | No                       | Yes                      |
|----------------------------------|--------------------------|--------------------------|
| Formula                          | <input type="checkbox"/> | <input type="checkbox"/> |
| Soy milk                         | <input type="checkbox"/> | <input type="checkbox"/> |
| Goat's milk                      | <input type="checkbox"/> | <input type="checkbox"/> |
| Hypo-allergenic formula          | <input type="checkbox"/> | <input type="checkbox"/> |
| Cow's milk                       | <input type="checkbox"/> | <input type="checkbox"/> |
| Another type of milk or formula: | <input type="checkbox"/> | <input type="checkbox"/> |

\_\_\_\_\_

5. **Since you and your baby have been home**, has your baby needed to stay in the hospital?

- No
- Yes

6. How much time does your baby spend in sleep during the night (between 7 in the evening and 7 in the morning)?

|                      |                      |        |                      |                      |         |
|----------------------|----------------------|--------|----------------------|----------------------|---------|
| <input type="text"/> | <input type="text"/> | hours, | <input type="text"/> | <input type="text"/> | minutes |
|----------------------|----------------------|--------|----------------------|----------------------|---------|

7. How many times does your baby wake up during the night?

|                      |                      |       |
|----------------------|----------------------|-------|
| <input type="text"/> | <input type="text"/> | times |
|----------------------|----------------------|-------|

8. How much time during the night does your baby spend in wakefulness (from 10 in the evening to 6 in the morning)?

|                      |                      |        |                      |                      |         |
|----------------------|----------------------|--------|----------------------|----------------------|---------|
| <input type="text"/> | <input type="text"/> | hours, | <input type="text"/> | <input type="text"/> | minutes |
|----------------------|----------------------|--------|----------------------|----------------------|---------|

9. Do you consider your baby's sleep to be a problem?

- Not a problem at all
- A small problem
- A very serious problem



PID:   -

Mother's Date of Birth:

year month day

**DAY 10**

10. *Since you and your baby have been home, has your baby had an infection that required antibiotic or antifungal (anti-yeast) treatment **that you haven't told us about yet?***

- No  
 Yes → if yes, please complete the following table:

**DRUG 1**

What was the type of infection?  Thrush  Ear infection  Chest infection  
 Urinary tract infection  Other: \_\_\_\_\_

What was the name of the drug? \_\_\_\_\_

How was it given?  Topical  Oral  Other: \_\_\_\_\_

What was the start date?     /   /    
 year month day

What was the end date?     /   /   or  Still currently in use

**DRUG 2**  Only one drug was given. (Do not complete the rest of the table)

What was the type of infection?  Thrush  Ear infection  Chest infection  
 Urinary tract infection  Other: \_\_\_\_\_

What was the name of the second drug? \_\_\_\_\_

How was it given?  Topical  Oral  Other: \_\_\_\_\_

What was the start date?     /   /    
 year month day

What was the end date?     /   /   or  Still currently in use

PID:

|  |  |   |  |  |
|--|--|---|--|--|
|  |  | - |  |  |
|--|--|---|--|--|

Mother's Date of Birth:

|  |  |  |  |
|--|--|--|--|
|  |  |  |  |
|--|--|--|--|

year

|  |  |
|--|--|
|  |  |
|--|--|

month

|  |  |
|--|--|
|  |  |
|--|--|

day

**DAY 10**

---

11. Please list any other medications, vitamins, homeopathics or supplements that ***your baby*** has taken ***since birth***.

None

| <u>Medication, vitamin or supplement name</u> | <u>Currently in Use?</u> |                          |
|-----------------------------------------------|--------------------------|--------------------------|
|                                               | <b>No</b>                | <b>Yes</b>               |
| a. _____                                      | <input type="checkbox"/> | <input type="checkbox"/> |
| b. _____                                      | <input type="checkbox"/> | <input type="checkbox"/> |
| c. _____                                      | <input type="checkbox"/> | <input type="checkbox"/> |
| d. _____                                      | <input type="checkbox"/> | <input type="checkbox"/> |
| e. _____                                      | <input type="checkbox"/> | <input type="checkbox"/> |

PID:   -

Mother's Date of Birth:

year month day

**DAY 10**

12. *Since you and your baby have been home*, have *you* taken any antibiotic or antifungal (anti-yeast) medications *that you haven't told us about yet?*

- No
- Yes → if yes, please complete the following table:

**DRUG 1**

What was the name of the drug? \_\_\_\_\_

How was it given?  Topical  Oral  Other: \_\_\_\_\_

What was the start date?     /   /

year month day

What was the end date?     /   /   or  Still currently in use

year month day

**DRUG 2**

Only one drug was taken. (Do not complete the rest of the table)

What was the name of the second drug? \_\_\_\_\_

How was it given?  Topical  Oral  Other: \_\_\_\_\_

What was the start date?     /   /

year month day

What was the end date?     /   /   or  Still currently in use

year month day

PID:

|  |  |   |  |  |  |
|--|--|---|--|--|--|
|  |  | - |  |  |  |
|--|--|---|--|--|--|

Mother's Date of Birth:

|  |  |  |  |
|--|--|--|--|
|  |  |  |  |
|--|--|--|--|

year

|  |  |
|--|--|
|  |  |
|--|--|

month

|  |  |
|--|--|
|  |  |
|--|--|

day

**DAY 10**

---

13. If you are currently breastfeeding, please list any other prescription medications that **you** have taken *since your baby was born*.

- Not currently breastfeeding  
 None

| <u>Medication name</u> | <u>Currently in Use?</u> |                          |
|------------------------|--------------------------|--------------------------|
|                        | No                       | Yes                      |
| a. _____               | <input type="checkbox"/> | <input type="checkbox"/> |
| b. _____               | <input type="checkbox"/> | <input type="checkbox"/> |
| c. _____               | <input type="checkbox"/> | <input type="checkbox"/> |
| d. _____               | <input type="checkbox"/> | <input type="checkbox"/> |
| e. _____               | <input type="checkbox"/> | <input type="checkbox"/> |

**6 WEEKS**

**Instructions:**

- This form is to be completed when your baby is **6 weeks old**.
- Mark only one box with an "X" for each question, unless instructed to do otherwise.
- Please use your study calendar to help you remember the information asked for.
- All of your answers will remain confidential.
- If you do not understand a question, please ask a research staff member by calling 905-525-9140 ext 22146 or by emailing babyandmistudy@gmail.com.
- Please return this form when you visit McMaster University Medical Center for your first study visit.

1. What is today's date?     /   /    
 year month day

2. How much did your baby weigh at your most recent visit with your midwife or doctor?  
    grams or   lbs,   oz or  I don't know

3. Have you **ever** breast fed your baby?

No

Yes

↳ if yes, **do you still** breastfeed your baby?

No

↳ if no, how old was your baby when you stopped breast feeding?

weeks

(fill in "0" if your baby was less than 1 week old)

Yes

↳ if yes, has your baby **ever** had anything other than breast milk or water?

No

Yes

↳ if yes, how old was your baby when he or she first had anything other than breast milk or water?

weeks

(fill in "0" if your baby was less than 1 week old)

PID:

|  |  |   |  |  |  |
|--|--|---|--|--|--|
|  |  | - |  |  |  |
|--|--|---|--|--|--|

Mother's Date of Birth:

|      |  |  |  |       |  |     |
|------|--|--|--|-------|--|-----|
|      |  |  |  |       |  |     |
| year |  |  |  | month |  | day |

**6 WEEKS**

---

4. Has your baby ***ever*** had any of the following?

|                                  | <u>No</u>                | <u>Yes</u>                 | <u>Current Use</u>                                                                                                                                                                                     |  |  |
|----------------------------------|--------------------------|----------------------------|--------------------------------------------------------------------------------------------------------------------------------------------------------------------------------------------------------|--|--|
| Formula                          | <input type="checkbox"/> | <input type="checkbox"/> → | <table border="1" style="display: inline-table; vertical-align: middle;"> <tr> <td style="width: 20px; height: 20px;"></td> <td style="width: 20px; height: 20px;"></td> </tr> </table> times per week |  |  |
|                                  |                          |                            |                                                                                                                                                                                                        |  |  |
| Soy milk                         | <input type="checkbox"/> | <input type="checkbox"/> → | <table border="1" style="display: inline-table; vertical-align: middle;"> <tr> <td style="width: 20px; height: 20px;"></td> <td style="width: 20px; height: 20px;"></td> </tr> </table> times per week |  |  |
|                                  |                          |                            |                                                                                                                                                                                                        |  |  |
| Goat's milk                      | <input type="checkbox"/> | <input type="checkbox"/> → | <table border="1" style="display: inline-table; vertical-align: middle;"> <tr> <td style="width: 20px; height: 20px;"></td> <td style="width: 20px; height: 20px;"></td> </tr> </table> times per week |  |  |
|                                  |                          |                            |                                                                                                                                                                                                        |  |  |
| Hypo-allergenic formula          | <input type="checkbox"/> | <input type="checkbox"/> → | <table border="1" style="display: inline-table; vertical-align: middle;"> <tr> <td style="width: 20px; height: 20px;"></td> <td style="width: 20px; height: 20px;"></td> </tr> </table> times per week |  |  |
|                                  |                          |                            |                                                                                                                                                                                                        |  |  |
| Cow's milk                       | <input type="checkbox"/> | <input type="checkbox"/> → | <table border="1" style="display: inline-table; vertical-align: middle;"> <tr> <td style="width: 20px; height: 20px;"></td> <td style="width: 20px; height: 20px;"></td> </tr> </table> times per week |  |  |
|                                  |                          |                            |                                                                                                                                                                                                        |  |  |
| Another type of milk or formula: | <input type="checkbox"/> | <input type="checkbox"/> → | <table border="1" style="display: inline-table; vertical-align: middle;"> <tr> <td style="width: 20px; height: 20px;"></td> <td style="width: 20px; height: 20px;"></td> </tr> </table> times per week |  |  |
|                                  |                          |                            |                                                                                                                                                                                                        |  |  |

---

**6 WEEKS**

5. Has your baby ***ever*** had any of the following foods or beverages?

|                          | <u>No</u>                | <u>Yes</u>                 | <u>Current Use</u>                                       |
|--------------------------|--------------------------|----------------------------|----------------------------------------------------------|
| Rice cereal              | <input type="checkbox"/> | <input type="checkbox"/> → | <input type="text"/> <input type="text"/> times per week |
| Other cereal             | <input type="checkbox"/> | <input type="checkbox"/> → | <input type="text"/> <input type="text"/> times per week |
| Bread or toast           | <input type="checkbox"/> | <input type="checkbox"/> → | <input type="text"/> <input type="text"/> times per week |
| Baby cookies             | <input type="checkbox"/> | <input type="checkbox"/> → | <input type="text"/> <input type="text"/> times per week |
| Baked goods              | <input type="checkbox"/> | <input type="checkbox"/> → | <input type="text"/> <input type="text"/> times per week |
| Dairy products           | <input type="checkbox"/> | <input type="checkbox"/> → | <input type="text"/> <input type="text"/> times per week |
| Egg yolk                 | <input type="checkbox"/> | <input type="checkbox"/> → | <input type="text"/> <input type="text"/> times per week |
| Egg white                | <input type="checkbox"/> | <input type="checkbox"/> → | <input type="text"/> <input type="text"/> times per week |
| Meat                     | <input type="checkbox"/> | <input type="checkbox"/> → | <input type="text"/> <input type="text"/> times per week |
| Fish                     | <input type="checkbox"/> | <input type="checkbox"/> → | <input type="text"/> <input type="text"/> times per week |
| Raw vegetables           | <input type="checkbox"/> | <input type="checkbox"/> → | <input type="text"/> <input type="text"/> times per week |
| Potato                   | <input type="checkbox"/> | <input type="checkbox"/> → | <input type="text"/> <input type="text"/> times per week |
| Cooked vegetables        | <input type="checkbox"/> | <input type="checkbox"/> → | <input type="text"/> <input type="text"/> times per week |
| Legumes                  | <input type="checkbox"/> | <input type="checkbox"/> → | <input type="text"/> <input type="text"/> times per week |
| Soy products (i.e. tofu) | <input type="checkbox"/> | <input type="checkbox"/> → | <input type="text"/> <input type="text"/> times per week |
| Raw fruit                | <input type="checkbox"/> | <input type="checkbox"/> → | <input type="text"/> <input type="text"/> times per week |
| Cooked fruit             | <input type="checkbox"/> | <input type="checkbox"/> → | <input type="text"/> <input type="text"/> times per week |

**6 WEEKS**

|                                                     | <u>No</u>                | <u>Yes</u>                 | <u>Current Use</u>                                       |
|-----------------------------------------------------|--------------------------|----------------------------|----------------------------------------------------------|
| Pop                                                 | <input type="checkbox"/> | <input type="checkbox"/> → | <input type="text"/> <input type="text"/> times per week |
| Other fizzy drinks                                  | <input type="checkbox"/> | <input type="checkbox"/> → | <input type="text"/> <input type="text"/> times per week |
| Apple juice                                         | <input type="checkbox"/> | <input type="checkbox"/> → | <input type="text"/> <input type="text"/> times per week |
| Other fruit drinks                                  | <input type="checkbox"/> | <input type="checkbox"/> → | <input type="text"/> <input type="text"/> times per week |
| Herbal drink                                        | <input type="checkbox"/> | <input type="checkbox"/> → | <input type="text"/> <input type="text"/> times per week |
| Unpasteurized milk                                  | <input type="checkbox"/> | <input type="checkbox"/> → | <input type="text"/> <input type="text"/> times per week |
| Gripe water                                         | <input type="checkbox"/> | <input type="checkbox"/> → | <input type="text"/> <input type="text"/> times per week |
| Tea (herbal)                                        | <input type="checkbox"/> | <input type="checkbox"/> → | <input type="text"/> <input type="text"/> times per week |
| Tea (caffeinated)                                   | <input type="checkbox"/> | <input type="checkbox"/> → | <input type="text"/> <input type="text"/> times per week |
| Coffee                                              | <input type="checkbox"/> | <input type="checkbox"/> → | <input type="text"/> <input type="text"/> times per week |
| A little alcohol                                    | <input type="checkbox"/> | <input type="checkbox"/> → | <input type="text"/> <input type="text"/> times per week |
| Potato chips                                        | <input type="checkbox"/> | <input type="checkbox"/> → | <input type="text"/> <input type="text"/> times per week |
| Other salty snacks                                  | <input type="checkbox"/> | <input type="checkbox"/> → | <input type="text"/> <input type="text"/> times per week |
| Chocolate                                           | <input type="checkbox"/> | <input type="checkbox"/> → | <input type="text"/> <input type="text"/> times per week |
| Sweets                                              | <input type="checkbox"/> | <input type="checkbox"/> → | <input type="text"/> <input type="text"/> times per week |
| Peanuts/ peanut butter                              | <input type="checkbox"/> | <input type="checkbox"/> → | <input type="text"/> <input type="text"/> times per week |
| Tree nuts/ tree nut butter<br>(i.e. almond, cashew) | <input type="checkbox"/> | <input type="checkbox"/> → | <input type="text"/> <input type="text"/> times per week |



**6 WEEKS**

6. Please indicate if your baby **currently** has any of the following feeding behaviours:

|                                           | No                       | Yes                      |                                         |
|-------------------------------------------|--------------------------|--------------------------|-----------------------------------------|
| Slow feeding                              | <input type="checkbox"/> | <input type="checkbox"/> |                                         |
| Taking only small quantities at each feed | <input type="checkbox"/> | <input type="checkbox"/> |                                         |
| Choking                                   | <input type="checkbox"/> | <input type="checkbox"/> |                                         |
| Hungry/ not satisfied                     | <input type="checkbox"/> | <input type="checkbox"/> |                                         |
| Refused to take breast milk               | <input type="checkbox"/> | <input type="checkbox"/> | <input type="checkbox"/> Not applicable |
| Refused to take other milk                | <input type="checkbox"/> | <input type="checkbox"/> | <input type="checkbox"/> Not applicable |
| Refused to take solids                    | <input type="checkbox"/> | <input type="checkbox"/> | <input type="checkbox"/> Not applicable |
| Can not establish feeding routine         | <input type="checkbox"/> | <input type="checkbox"/> |                                         |

7. Are you **currently** having difficulties feeding your baby?

- No, no difficulties
- Yes, some difficulties
- Yes, great difficulties

8. Does your baby typically have **at least one** bowel movement every day?

No  
 ↳ if no, how many bowel movements does your baby have in a **typical week**?  
  bowel movements

Yes  
 ↳ if yes, how many bowel movements does your baby have in a **typical day**?  
  bowel movements

PID:   -

Mother's Date of Birth:          
 year month day

**6 WEEKS**

9. *Since your baby was 10 days old*, has *she or he* had an infection that required antibiotic or antifungal (anti-yeast) treatment?

- No  
 Yes → if yes, please complete the following table:

**DRUG 1**

What was the type of infection?  Thrush  Ear infection  Chest infection  
 Urinary tract infection  Other: \_\_\_\_\_

What was the name of the drug? \_\_\_\_\_

How was it given?  Topical  Oral  Other: \_\_\_\_\_

What was the start date?     /   /    
 year month day

What was the end date?     /   /   or  Still currently in use

**DRUG 2**  Only one drug was given. (Do not complete the rest of the table)

What was the type of infection?  Thrush  Ear infection  Chest infection  
 Urinary tract infection  Other: \_\_\_\_\_

What was the name of the second drug? \_\_\_\_\_

How was it given?  Topical  Oral  Other: \_\_\_\_\_

What was the start date?     /   /    
 year month day

What was the end date?     /   /   or  Still currently in use

PID:

|  |  |   |  |  |  |
|--|--|---|--|--|--|
|  |  | - |  |  |  |
|--|--|---|--|--|--|

Mother's Date of Birth:

|  |  |  |  |
|--|--|--|--|
|  |  |  |  |
|--|--|--|--|

year

|  |  |
|--|--|
|  |  |
|--|--|

month

|  |  |
|--|--|
|  |  |
|--|--|

day

**6 WEEKS**

---

10. Please list any other medications, vitamins, homeopathics or supplements that ***your baby*** has taken ***since he or she was 10 days old.***

None

Medication, vitamin or supplement name

Currently in Use?

**No**                      **Yes**

a. \_\_\_\_\_



b. \_\_\_\_\_



c. \_\_\_\_\_



d. \_\_\_\_\_



e. \_\_\_\_\_



11. ***Since your baby was 10 days old***, has she or he needed to stay in the hospital?

No

Yes

PID:   -

Mother's Date of Birth:

year month day

**6 WEEKS**

12. *Since your baby was 10 days old*, have **you** taken any antibiotic or antifungal (anti-yeast) medications?

- No  
 Yes → if yes, please complete the following table:

**DRUG 1**

What was the name of the drug? \_\_\_\_\_

How was it given?  Topical  Oral  Other: \_\_\_\_\_

What was the start date?     /   /

year month day

What was the end date?     /   /   or  Still currently in use

year month day

**DRUG 2**  Only one drug was taken. (Do not complete the rest of the table)

What was the name of the second drug? \_\_\_\_\_

How was it given?  Topical  Oral  Other: \_\_\_\_\_

What was the start date?     /   /

year month day

What was the end date?     /   /   or  Still currently in use

year month day

**6 WEEKS**

13. ***If you are currently breastfeeding***, Please list any other prescription medications that ***you*** have taken ***since your baby was 10 days old***.

- Not currently breastfeeding
- None

| <u>Medication name</u> | <u>Currently in Use?</u> |                          |
|------------------------|--------------------------|--------------------------|
|                        | No                       | Yes                      |
| a. _____               | <input type="checkbox"/> | <input type="checkbox"/> |
| b. _____               | <input type="checkbox"/> | <input type="checkbox"/> |
| c. _____               | <input type="checkbox"/> | <input type="checkbox"/> |
| d. _____               | <input type="checkbox"/> | <input type="checkbox"/> |
| e. _____               | <input type="checkbox"/> | <input type="checkbox"/> |

14. How much time does your baby spend in sleep during the night (between 7 in the evening and 7 in the morning)?

hours,   minutes

15. How many times does your baby wake up during the night?

times

16. How much time during the night does your baby spend in wakefulness (from 10 in the evening to 6 in the morning)?

hours,   minutes

17. Do you consider your baby's sleep to be a problem?

- Not a problem at all
- A small problem
- A very serious problem

18. Has your baby been diagnosed with asthma or reactive airway disease by your doctor?

- Yes
- No

PID:

|  |  |   |  |  |  |
|--|--|---|--|--|--|
|  |  | - |  |  |  |
|--|--|---|--|--|--|

Mother's Date of Birth:

|  |  |  |  |
|--|--|--|--|
|  |  |  |  |
|--|--|--|--|

year

|  |  |
|--|--|
|  |  |
|--|--|

month

|  |  |
|--|--|
|  |  |
|--|--|

day

**6 WEEKS**

---

19. Does your baby take any puffers or breathing medications?

- Yes
- No

20. Have you been told by your doctor that your baby has eczema?

- Yes
- No

21. Has your baby **ever** experienced any of the following?: (check all that apply)

- Itchy rashes
- Itchy rashes that don't go away on the face, knuckles, elbows or knees
- Rash on the nose, mouth or diaper area
- Dry, thickened or scaly skin or more skin creases in the palms than usual
- Cracked skin around the ear
- Scaly scalp that won't go away
- Red dots surrounding hair follicles
- None of the above

22. Have you **ever** had any concerns that your baby may have an allergy?

- No
- Yes, I/we suspect(ed) an allergy
  - ↳ if yes, please describe what the allergic substance was thought to be and what made you suspect and allergy:

---



---



---

- Yes, an allergy was confirmed by the doctor
  - ↳ if yes, please indicate what the allergic substance(s) is/are:

---



---



---

**12 WEEKS – PART 1**

**Instructions:**

- This form is to be completed by research personnel at the 12 week study visit.
- Record the measurements indicated below and attach this form to "Part 2" completed by the participant.

1. Date and time of visit:     /   /     :    
 year month day 24 hour clock

2. Head circumference:   .  cm

3. Tricep skinfold thickness:

Measurement 1:   .  cm

Measurement 2:   .  cm

Measurement 3:   .  cm

4. Subscapular skinfold thickness:

Measurement 1:   .  cm

Measurement 2:   .  cm

Measurement 3:   .  cm

5. Bicep skinfold thickness:

Measurement 1:   .  cm

Measurement 2:   .  cm

Measurement 3:   .  cm

PID:

|  |  |   |  |  |
|--|--|---|--|--|
|  |  | - |  |  |
|--|--|---|--|--|

Mother's Date of Birth:

|      |  |  |  |       |  |     |  |
|------|--|--|--|-------|--|-----|--|
|      |  |  |  |       |  |     |  |
| year |  |  |  | month |  | day |  |

**12 WEEKS – PART 1**

---

6. Mid-arm circumference:

Measurement 1: 

|  |  |
|--|--|
|  |  |
|--|--|

 . 

|  |
|--|
|  |
|--|

 cm

Measurement 2: 

|  |  |
|--|--|
|  |  |
|--|--|

 . 

|  |
|--|
|  |
|--|

 cm

Measurement 3: 

|  |  |
|--|--|
|  |  |
|--|--|

 . 

|  |
|--|
|  |
|--|

 cm

7. Suprailiac skinfold thickness:

Measurement 1: 

|  |  |
|--|--|
|  |  |
|--|--|

 . 

|  |
|--|
|  |
|--|

 cm

Measurement 2: 

|  |  |
|--|--|
|  |  |
|--|--|

 . 

|  |
|--|
|  |
|--|

 cm

Measurement 3: 

|  |  |
|--|--|
|  |  |
|--|--|

 . 

|  |
|--|
|  |
|--|

 cm

8. Hip circumference:

Measurement 1: 

|  |  |
|--|--|
|  |  |
|--|--|

 . 

|  |
|--|
|  |
|--|

 cm

Measurement 2: 

|  |  |
|--|--|
|  |  |
|--|--|

 . 

|  |
|--|
|  |
|--|

 cm

Measurement 3: 

|  |  |
|--|--|
|  |  |
|--|--|

 . 

|  |
|--|
|  |
|--|

 cm

9. Abdominal circumference:

Measurement 1: 

|  |  |
|--|--|
|  |  |
|--|--|

 . 

|  |
|--|
|  |
|--|

 cm

Measurement 2: 

|  |  |
|--|--|
|  |  |
|--|--|

 . 

|  |
|--|
|  |
|--|

 cm

Measurement 3: 

|  |  |
|--|--|
|  |  |
|--|--|

 . 

|  |
|--|
|  |
|--|

 cm

10. Length: 

|  |  |  |
|--|--|--|
|  |  |  |
|--|--|--|

 . 

|  |
|--|
|  |
|--|

 cm



**12 WEEKS – PART 1**

- 11. Percent fat:   .  %
- 12. Percent fat free mass:   .  %
- 13. Fat mass:   .     kg
- 14. Fat free mass:   .     kg
- 15. Body mass:   .     kg
- 16. Body volume:   .     L
- 17. Body density:   .     kg/L
- 18. Fat mass density:   .     kg/L
- 19. Fat free mass density:   .     kg/L
- 20. Body surface area:     .  cm<sup>2</sup>
- 21. Thoracic gas volume:   .     L

22. The PEA POD test was:
- Completed
  - Begun but terminated early
  - Not attempted because baby exceeded capacity
  - Not attempted because parent declined

23. Were stool samples received?

- No
- Yes

↳ if yes, indicate the following:

Date Collected

|                 |                                                                                                                                                                             |
|-----------------|-----------------------------------------------------------------------------------------------------------------------------------------------------------------------------|
| <b>Day 3</b>    | <input type="text"/> <input type="text"/> <input type="text"/> <input type="text"/> / <input type="text"/> <input type="text"/> / <input type="text"/> <input type="text"/> |
|                 | year month day                                                                                                                                                              |
| <b>Day 10</b>   | <input type="text"/> <input type="text"/> <input type="text"/> <input type="text"/> / <input type="text"/> <input type="text"/> / <input type="text"/> <input type="text"/> |
| <b>6 Weeks</b>  | <input type="text"/> <input type="text"/> <input type="text"/> <input type="text"/> / <input type="text"/> <input type="text"/> / <input type="text"/> <input type="text"/> |
| <b>12 Weeks</b> | <input type="text"/> <input type="text"/> <input type="text"/> <input type="text"/> / <input type="text"/> <input type="text"/> / <input type="text"/> <input type="text"/> |

**12 WEEKS – PART 2**

**Instructions:**

- Mark only one box with an "X" for each question, unless instructed to do otherwise.
- Please use your study calendar to help you remember the information asked for.
- All of your answers will remain confidential.
- If you do not understand a question, please ask a research staff member.

1. Have you **ever** breast fed your baby?

No

Yes

↳ if yes, **do you still** breastfeed your baby?

No

↳ if no, how old was your baby when you stopped breast feeding?

weeks

(fill in "0" if your baby was less than 1 week old)

Yes

↳ if yes, has your baby **ever** had anything other than breast milk or water?

No

Yes

↳ if yes, how old was your baby when he or she first had anything other than breast milk or water?

weeks

(fill in "0" if your baby was less than 1 week old)

2. Has your baby **ever** had any of the following?

|                                  | <u>No</u>                | <u>Yes</u>                 | <u>Current Use</u>                                       |
|----------------------------------|--------------------------|----------------------------|----------------------------------------------------------|
| Formula                          | <input type="checkbox"/> | <input type="checkbox"/> → | <input type="text"/> <input type="text"/> times per week |
| Soy milk                         | <input type="checkbox"/> | <input type="checkbox"/> → | <input type="text"/> <input type="text"/> times per week |
| Goat's milk                      | <input type="checkbox"/> | <input type="checkbox"/> → | <input type="text"/> <input type="text"/> times per week |
| Hypo-allergenic formula          | <input type="checkbox"/> | <input type="checkbox"/> → | <input type="text"/> <input type="text"/> times per week |
| Cow's milk                       | <input type="checkbox"/> | <input type="checkbox"/> → | <input type="text"/> <input type="text"/> times per week |
| Another type of milk or formula: | <input type="checkbox"/> | <input type="checkbox"/> → | <input type="text"/> <input type="text"/> times per week |

**12 WEEKS – PART 2**

3. Has your baby **ever** had any of the following foods or beverages?

|                          | <u>No</u>                | <u>Yes</u>                 | <u>Current Use</u>                                       |
|--------------------------|--------------------------|----------------------------|----------------------------------------------------------|
| Rice cereal              | <input type="checkbox"/> | <input type="checkbox"/> → | <input type="text"/> <input type="text"/> times per week |
| Other cereal             | <input type="checkbox"/> | <input type="checkbox"/> → | <input type="text"/> <input type="text"/> times per week |
| Bread or toast           | <input type="checkbox"/> | <input type="checkbox"/> → | <input type="text"/> <input type="text"/> times per week |
| Baby cookies             | <input type="checkbox"/> | <input type="checkbox"/> → | <input type="text"/> <input type="text"/> times per week |
| Baked goods              | <input type="checkbox"/> | <input type="checkbox"/> → | <input type="text"/> <input type="text"/> times per week |
| Dairy products           | <input type="checkbox"/> | <input type="checkbox"/> → | <input type="text"/> <input type="text"/> times per week |
| Egg yolk                 | <input type="checkbox"/> | <input type="checkbox"/> → | <input type="text"/> <input type="text"/> times per week |
| Egg white                | <input type="checkbox"/> | <input type="checkbox"/> → | <input type="text"/> <input type="text"/> times per week |
| Meat                     | <input type="checkbox"/> | <input type="checkbox"/> → | <input type="text"/> <input type="text"/> times per week |
| Fish                     | <input type="checkbox"/> | <input type="checkbox"/> → | <input type="text"/> <input type="text"/> times per week |
| Raw vegetables           | <input type="checkbox"/> | <input type="checkbox"/> → | <input type="text"/> <input type="text"/> times per week |
| Potato                   | <input type="checkbox"/> | <input type="checkbox"/> → | <input type="text"/> <input type="text"/> times per week |
| Cooked vegetables        | <input type="checkbox"/> | <input type="checkbox"/> → | <input type="text"/> <input type="text"/> times per week |
| Legumes                  | <input type="checkbox"/> | <input type="checkbox"/> → | <input type="text"/> <input type="text"/> times per week |
| Soy products (i.e. tofu) | <input type="checkbox"/> | <input type="checkbox"/> → | <input type="text"/> <input type="text"/> times per week |
| Raw fruit                | <input type="checkbox"/> | <input type="checkbox"/> → | <input type="text"/> <input type="text"/> times per week |
| Cooked fruit             | <input type="checkbox"/> | <input type="checkbox"/> → | <input type="text"/> <input type="text"/> times per week |

**12 WEEKS – PART 2**

---

|                                                     | <u>No</u>                | <u>Yes</u>                 | <u>Current Use</u>                                       |
|-----------------------------------------------------|--------------------------|----------------------------|----------------------------------------------------------|
| Pop                                                 | <input type="checkbox"/> | <input type="checkbox"/> → | <input type="text"/> <input type="text"/> times per week |
| Other fizzy drinks                                  | <input type="checkbox"/> | <input type="checkbox"/> → | <input type="text"/> <input type="text"/> times per week |
| Apple juice                                         | <input type="checkbox"/> | <input type="checkbox"/> → | <input type="text"/> <input type="text"/> times per week |
| Other fruit drinks                                  | <input type="checkbox"/> | <input type="checkbox"/> → | <input type="text"/> <input type="text"/> times per week |
| Herbal drink                                        | <input type="checkbox"/> | <input type="checkbox"/> → | <input type="text"/> <input type="text"/> times per week |
| Unpasteurized milk                                  | <input type="checkbox"/> | <input type="checkbox"/> → | <input type="text"/> <input type="text"/> times per week |
| Gripe water                                         | <input type="checkbox"/> | <input type="checkbox"/> → | <input type="text"/> <input type="text"/> times per week |
| Tea (herbal)                                        | <input type="checkbox"/> | <input type="checkbox"/> → | <input type="text"/> <input type="text"/> times per week |
| Tea (caffeinated)                                   | <input type="checkbox"/> | <input type="checkbox"/> → | <input type="text"/> <input type="text"/> times per week |
| Coffee                                              | <input type="checkbox"/> | <input type="checkbox"/> → | <input type="text"/> <input type="text"/> times per week |
| A little alcohol                                    | <input type="checkbox"/> | <input type="checkbox"/> → | <input type="text"/> <input type="text"/> times per week |
| Potato chips                                        | <input type="checkbox"/> | <input type="checkbox"/> → | <input type="text"/> <input type="text"/> times per week |
| Other salty snacks                                  | <input type="checkbox"/> | <input type="checkbox"/> → | <input type="text"/> <input type="text"/> times per week |
| Chocolate                                           | <input type="checkbox"/> | <input type="checkbox"/> → | <input type="text"/> <input type="text"/> times per week |
| Sweets                                              | <input type="checkbox"/> | <input type="checkbox"/> → | <input type="text"/> <input type="text"/> times per week |
| Peanuts/ peanut butter                              | <input type="checkbox"/> | <input type="checkbox"/> → | <input type="text"/> <input type="text"/> times per week |
| Tree nuts/ tree nut butter<br>(i.e. almond, cashew) | <input type="checkbox"/> | <input type="checkbox"/> → | <input type="text"/> <input type="text"/> times per week |

|  |  |   |  |  |
|--|--|---|--|--|
|  |  | - |  |  |
|--|--|---|--|--|

|      |  |  |  |       |  |     |  |
|------|--|--|--|-------|--|-----|--|
|      |  |  |  |       |  |     |  |
| year |  |  |  | month |  | day |  |

**12 WEEKS – PART 2**

---

4. Please indicate if your baby **currently** has any of the following feeding behaviours:

|                                           | No                       | Yes                      |                                         |
|-------------------------------------------|--------------------------|--------------------------|-----------------------------------------|
| Slow feeding                              | <input type="checkbox"/> | <input type="checkbox"/> |                                         |
| Taking only small quantities at each feed | <input type="checkbox"/> | <input type="checkbox"/> |                                         |
| Choking                                   | <input type="checkbox"/> | <input type="checkbox"/> |                                         |
| Hungry/ not satisfied                     | <input type="checkbox"/> | <input type="checkbox"/> |                                         |
| Refused to take breast milk               | <input type="checkbox"/> | <input type="checkbox"/> | <input type="checkbox"/> Not applicable |
| Refused to take other milk                | <input type="checkbox"/> | <input type="checkbox"/> | <input type="checkbox"/> Not applicable |
| Refused to take solids                    | <input type="checkbox"/> | <input type="checkbox"/> | <input type="checkbox"/> Not applicable |
| Can not establish feeding routine         | <input type="checkbox"/> | <input type="checkbox"/> |                                         |

5. Are you **currently** having difficulties feeding your baby?

- No, no difficulties
- Yes, some difficulties
- Yes, great difficulties

6. **During the past week**, how often did your baby usually spit-up (anything coming out of the mouth) during a 24-hour period?

- Less than once
- 1 to 3 times
- 4 to 6 times
- More than 6 times

7. **During the past week**, how much did your baby usually spit-up (anything coming out of the mouth) during a typical episode?

- Did not spit up
- Less than 1 tablespoonful
- 1 tablespoonful to 2 ounces
- More than 2 ounces to half the feeding
- More than half the feeding

PID:

|  |  |   |  |  |
|--|--|---|--|--|
|  |  | - |  |  |
|--|--|---|--|--|

Mother's Date of Birth:

|      |  |  |  |       |  |     |  |
|------|--|--|--|-------|--|-----|--|
|      |  |  |  |       |  |     |  |
| year |  |  |  | month |  | day |  |

**12 WEEKS – PART 2**

---

8. ***During the past week***, how often did spitting up (anything coming out of the mouth) seem to be uncomfortable for your baby, for example, crying, fussing, irritability, etc?

- Never
- Rarely
- Sometimes
- Often
- Always

9. ***During the past week***, how often did your baby refuse a feeding even when hungry?

- Never
- Rarely
- Sometimes
- Often
- Always

10. ***During the past week***, how often did your baby stop eating soon after starting even when hungry?

- Never
- Rarely
- Sometimes
- Often
- Always

11. ***During the past week***, did your baby cry a lot during or within 1 hour after feedings?

- Never
- Rarely
- Sometimes
- Often
- Always

12. ***During the past week***, did your baby cry or fuss more than usual?

- Never
- Rarely
- Sometimes
- Often
- Always

PID:

|  |  |   |  |  |
|--|--|---|--|--|
|  |  | - |  |  |
|--|--|---|--|--|

Mother's Date of Birth:

|      |  |  |  |       |  |     |  |
|------|--|--|--|-------|--|-----|--|
|      |  |  |  |       |  |     |  |
| year |  |  |  | month |  | day |  |

**12 WEEKS – PART 2**

---

13. ***During the past week***, on average how long did your baby cry or fuss during a 24 hour period?

- Less than 10 minutes
- 10 minutes to 1 hour
- More than 1 hour but less than 3 hours
- 3 or more hours

14. ***During the past week***, how often did your baby have hiccups?

- Never
- Rarely
- Sometimes
- Often
- Always

15. ***During the past week***, how often did your baby have episodes of arching back?

- Never
- Rarely
- Sometimes
- Often
- Always

16. ***During the past week***, has your baby stopped breathing while awake or struggled to breathe?

- No
- Yes

17. ***During the past week***, has your baby turned blue or purple?

- No
- Yes

PID:

|  |  |   |  |  |  |
|--|--|---|--|--|--|
|  |  | - |  |  |  |
|--|--|---|--|--|--|

Mother's Date of Birth:

|  |  |  |  |
|--|--|--|--|
|  |  |  |  |
|--|--|--|--|

year

|  |  |
|--|--|
|  |  |
|--|--|

month

|  |  |
|--|--|
|  |  |
|--|--|

day

**12 WEEKS – PART 2**

---

18. **In the last month**, have you noted your baby straining for 10 minutes or longer before successful passage of stool?

No

Yes

↳ if yes, how many times per week?

|  |  |
|--|--|
|  |  |
|--|--|

times

19. Does your baby typically have **at least one** bowel movement every day?

No

↳ if no, how many bowel movements does your baby have in a **typical week**?

|  |  |
|--|--|
|  |  |
|--|--|

bowel movements

Yes

↳ if yes, how many bowel movements does your baby have in a **typical day**?

|  |  |
|--|--|
|  |  |
|--|--|

bowel movements

20. **In the last month**, has your baby had any episodes of abdominal pain or discomfort?

No

Yes

21. **Since your last study visit**, has your baby needed to stay in the hospital?

No

Yes



**12 WEEKS – PART 2**

22. *Since your last study visit, has your baby had an infection that required antibiotic or antifungal (anti-yeast) treatment?*

- No  
 Yes → if yes, please complete the following table:

**DRUG 1**

What was the type of infection?  Thrush  Ear infection  Chest infection  
 Urinary tract infection  Other: \_\_\_\_\_

What was the name of the drug? \_\_\_\_\_

How was it given?  Topical  Oral  Other: \_\_\_\_\_

What was the start date?     /   /    
 year month day

What was the end date?     /   /   or  Still currently in use

**DRUG 2**  Only one drug was given. (Do not complete the rest of the table)

What was the type of infection?  Thrush  Ear infection  Chest infection  
 Urinary tract infection  Other: \_\_\_\_\_

What was the name of the second drug? \_\_\_\_\_

How was it given?  Topical  Oral  Other: \_\_\_\_\_

What was the start date?     /   /    
 year month day

What was the end date?     /   /   or  Still currently in use

PID:

|  |  |   |  |  |  |
|--|--|---|--|--|--|
|  |  | - |  |  |  |
|--|--|---|--|--|--|

Mother's Date of Birth:

|      |  |  |  |       |  |     |  |
|------|--|--|--|-------|--|-----|--|
|      |  |  |  |       |  |     |  |
| year |  |  |  | month |  | day |  |

**12 WEEKS – PART 2**

---

23. Please list any other medications, vitamins, homeopathics or supplements that ***your baby*** has taken ***since your last study visit.***

None

| <u>Medication, vitamin or supplement name</u> | <u>Currently in Use?</u> |                          |
|-----------------------------------------------|--------------------------|--------------------------|
|                                               | <b>No</b>                | <b>Yes</b>               |
| a. _____                                      | <input type="checkbox"/> | <input type="checkbox"/> |
| b. _____                                      | <input type="checkbox"/> | <input type="checkbox"/> |
| c. _____                                      | <input type="checkbox"/> | <input type="checkbox"/> |
| d. _____                                      | <input type="checkbox"/> | <input type="checkbox"/> |
| e. _____                                      | <input type="checkbox"/> | <input type="checkbox"/> |

PID:   -

Mother's Date of Birth:

year month day

**12 WEEKS – PART 2**

---

24. *Since your last study visit*, have *you* taken any antibiotic or antifungal (anti-yeast) medications?

- No  
 Yes → if yes, please complete the following table:

**DRUG 1**

What was the name of the drug? \_\_\_\_\_

How was it given?  Topical  Oral  Other: \_\_\_\_\_

What was the start date?     /   /    
 year month day

What was the end date?     /   /   or  Still currently in use

**DRUG 2**  Only one drug was taken. (Do not complete the rest of the table)

What was the name of the second drug? \_\_\_\_\_

How was it given?  Topical  Oral  Other: \_\_\_\_\_

What was the start date?     /   /    
 year month day

What was the end date?     /   /   or  Still currently in use

---

**12 WEEKS – PART 2**

25. **If you are currently breastfeeding**, please list any other prescription medications that **you** have taken **since your last study visit**.

- Not currently breastfeeding
- None

| <u>Medication name</u> | <u>Currently in Use?</u> |                          |
|------------------------|--------------------------|--------------------------|
|                        | No                       | Yes                      |
| a. _____               | <input type="checkbox"/> | <input type="checkbox"/> |
| b. _____               | <input type="checkbox"/> | <input type="checkbox"/> |
| c. _____               | <input type="checkbox"/> | <input type="checkbox"/> |
| d. _____               | <input type="checkbox"/> | <input type="checkbox"/> |
| e. _____               | <input type="checkbox"/> | <input type="checkbox"/> |

26. How much time does your baby spend in sleep during the night (between 7 in the evening and 7 in the morning)?

hours,   minutes

27. How many times does your baby wake up during the night?

times

28. How much time during the night does your baby spend in wakefulness (from 10 in the evening to 6 in the morning)?

hours,   minutes

29. Do you consider your baby's sleep to be a problem?

- Not a problem at all
- A small problem
- A very serious problem

30. Has your baby been diagnosed with asthma or reactive airway disease by your doctor?

- Yes
- No

PID:

|  |  |   |  |  |  |
|--|--|---|--|--|--|
|  |  | - |  |  |  |
|--|--|---|--|--|--|

Mother's Date of Birth:

|  |  |  |  |
|--|--|--|--|
|  |  |  |  |
|--|--|--|--|

year

|  |  |
|--|--|
|  |  |
|--|--|

month

|  |  |
|--|--|
|  |  |
|--|--|

day

**12 WEEKS – PART 2**

---

31. Does your baby take any puffers or breathing medications?

- Yes
- No

32. Have you been told by your doctor that your baby has eczema?

- Yes
- No

33. ***In the last month***, has your baby experienced any of the following?: (check all that apply)

- Itchy rashes
- Itchy rashes that don't go away on the face, knuckles, elbows or knees
- Rash on the nose, mouth or diaper area
- Dry, thickened or scaly skin or more skin creases in the palms than usual
- Cracked skin around the ear
- Scaly scalp that won't go away
- Red dots surrounding hair follicles
- None of the above

34. Have you ***ever*** had any concerns that your baby may have an allergy?

- No
- Yes, I/we suspect(ed) an allergy

↳ if yes, please describe what the allergic substance was thought to be and what made you suspect and allergy:

---



---



---

- Yes, an allergy was confirmed by the doctor

↳ if yes, please indicate what the allergic substance(s) is/are:

---



---



---

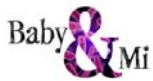

PID:

□ □ - □ □ □ □

Mother's Date of Birth:

□ □ □ □

year

□ □

month

□ □

day

**PEA POD QUESTIONNAIRE**

**Instructions:**

- Mark only one box with an "X" for each question, unless instructed to do otherwise.
- If you do not understand a question, please ask a research staff member.

1. What were your feelings about the PEA POD prior to its use?

- I was concerned/ worried
- I was curious/ interested
- I was indifferent
- I was uncomfortable
- Other: \_\_\_\_\_

2. Is your experience with the PEA POD what you expected based on the information that we provided to you?

- Yes
- No
- I had no expectations about the PEA POD

3. How comfortable were you during the use of the PEA POD?

- Very comfortable
- Comfortable
- Neither comfortable nor uncomfortable
- Uncomfortable
- Very uncomfortable

4. How comfortable do you think your baby was while inside the PEA POD?

- Very comfortable
- Comfortable
- Neither comfortable nor uncomfortable
- Uncomfortable
- Very uncomfortable

5. Additional comments, questions or concerns about the PEA POD:

---



---



---



---

**4 MONTHS**

**Instructions:**

- This form is to be completed by research personnel through telephone contact with participants at 4 months postpartum.
- Please refer to previous forms to appropriately prompt and ensure consistency for questions 3-5, 9, 12 and 21.

1. Was the 4 month follow up completed?

- No  
 Yes

2. Date:     /   /    
 year month day

3. Have you **ever** breast fed your baby?

- No  
 Yes

↳ if yes, **do you still** breastfeed your baby?

- No

↳ if no, how old was your baby when you stopped breast feeding?

weeks

(fill in "0" if your baby was less than 1 week old)

- Yes

↳ if yes, has your baby **ever** had anything other than breast milk or water?

- No  
 Yes

↳ if yes, how old was your baby when he or she first had anything other than breast milk or water?

weeks

(fill in "0" if your baby was less than 1 week old)

PID:

|  |  |   |  |  |
|--|--|---|--|--|
|  |  | - |  |  |
|--|--|---|--|--|

Mother's Date of Birth:

|      |  |  |  |       |  |     |  |
|------|--|--|--|-------|--|-----|--|
|      |  |  |  |       |  |     |  |
| year |  |  |  | month |  | day |  |

**4 MONTHS**

---

4. Has your baby ***ever*** had any of the following?

|                                  | <u>No</u>                | <u>Yes</u>                 | <u>Current Use</u>                                                                                      |  |  |
|----------------------------------|--------------------------|----------------------------|---------------------------------------------------------------------------------------------------------|--|--|
| Formula                          | <input type="checkbox"/> | <input type="checkbox"/> → | <table border="1" style="display: inline-table;"> <tr> <td></td><td></td> </tr> </table> times per week |  |  |
|                                  |                          |                            |                                                                                                         |  |  |
| Soy milk                         | <input type="checkbox"/> | <input type="checkbox"/> → | <table border="1" style="display: inline-table;"> <tr> <td></td><td></td> </tr> </table> times per week |  |  |
|                                  |                          |                            |                                                                                                         |  |  |
| Goat's milk                      | <input type="checkbox"/> | <input type="checkbox"/> → | <table border="1" style="display: inline-table;"> <tr> <td></td><td></td> </tr> </table> times per week |  |  |
|                                  |                          |                            |                                                                                                         |  |  |
| Hypo-allergenic formula          | <input type="checkbox"/> | <input type="checkbox"/> → | <table border="1" style="display: inline-table;"> <tr> <td></td><td></td> </tr> </table> times per week |  |  |
|                                  |                          |                            |                                                                                                         |  |  |
| Cow's milk                       | <input type="checkbox"/> | <input type="checkbox"/> → | <table border="1" style="display: inline-table;"> <tr> <td></td><td></td> </tr> </table> times per week |  |  |
|                                  |                          |                            |                                                                                                         |  |  |
| Another type of milk or formula: | <input type="checkbox"/> | <input type="checkbox"/> → | <table border="1" style="display: inline-table;"> <tr> <td></td><td></td> </tr> </table> times per week |  |  |
|                                  |                          |                            |                                                                                                         |  |  |

---



**4 MONTHS**

5. Has your baby ***ever*** had any of the following foods or beverages?

|                          | <u>No</u>                | <u>Yes</u>                 | <u>Current Use</u>                                       |
|--------------------------|--------------------------|----------------------------|----------------------------------------------------------|
| Rice cereal              | <input type="checkbox"/> | <input type="checkbox"/> → | <input type="text"/> <input type="text"/> times per week |
| Other cereal             | <input type="checkbox"/> | <input type="checkbox"/> → | <input type="text"/> <input type="text"/> times per week |
| Bread or toast           | <input type="checkbox"/> | <input type="checkbox"/> → | <input type="text"/> <input type="text"/> times per week |
| Baby cookies             | <input type="checkbox"/> | <input type="checkbox"/> → | <input type="text"/> <input type="text"/> times per week |
| Baked goods              | <input type="checkbox"/> | <input type="checkbox"/> → | <input type="text"/> <input type="text"/> times per week |
| Dairy products           | <input type="checkbox"/> | <input type="checkbox"/> → | <input type="text"/> <input type="text"/> times per week |
| Egg yolk                 | <input type="checkbox"/> | <input type="checkbox"/> → | <input type="text"/> <input type="text"/> times per week |
| Egg white                | <input type="checkbox"/> | <input type="checkbox"/> → | <input type="text"/> <input type="text"/> times per week |
| Meat                     | <input type="checkbox"/> | <input type="checkbox"/> → | <input type="text"/> <input type="text"/> times per week |
| Fish                     | <input type="checkbox"/> | <input type="checkbox"/> → | <input type="text"/> <input type="text"/> times per week |
| Raw vegetables           | <input type="checkbox"/> | <input type="checkbox"/> → | <input type="text"/> <input type="text"/> times per week |
| Potato                   | <input type="checkbox"/> | <input type="checkbox"/> → | <input type="text"/> <input type="text"/> times per week |
| Cooked vegetables        | <input type="checkbox"/> | <input type="checkbox"/> → | <input type="text"/> <input type="text"/> times per week |
| Legumes                  | <input type="checkbox"/> | <input type="checkbox"/> → | <input type="text"/> <input type="text"/> times per week |
| Soy products (i.e. tofu) | <input type="checkbox"/> | <input type="checkbox"/> → | <input type="text"/> <input type="text"/> times per week |
| Raw fruit                | <input type="checkbox"/> | <input type="checkbox"/> → | <input type="text"/> <input type="text"/> times per week |
| Cooked fruit             | <input type="checkbox"/> | <input type="checkbox"/> → | <input type="text"/> <input type="text"/> times per week |

**4 MONTHS**

|                                                     | <u>No</u>                | <u>Yes</u>                 | <u>Current Use</u>                                       |
|-----------------------------------------------------|--------------------------|----------------------------|----------------------------------------------------------|
| Pop                                                 | <input type="checkbox"/> | <input type="checkbox"/> → | <input type="text"/> <input type="text"/> times per week |
| Other fizzy drinks                                  | <input type="checkbox"/> | <input type="checkbox"/> → | <input type="text"/> <input type="text"/> times per week |
| Apple juice                                         | <input type="checkbox"/> | <input type="checkbox"/> → | <input type="text"/> <input type="text"/> times per week |
| Other fruit drinks                                  | <input type="checkbox"/> | <input type="checkbox"/> → | <input type="text"/> <input type="text"/> times per week |
| Herbal drink                                        | <input type="checkbox"/> | <input type="checkbox"/> → | <input type="text"/> <input type="text"/> times per week |
| Unpasteurized milk                                  | <input type="checkbox"/> | <input type="checkbox"/> → | <input type="text"/> <input type="text"/> times per week |
| Gripe water                                         | <input type="checkbox"/> | <input type="checkbox"/> → | <input type="text"/> <input type="text"/> times per week |
| Tea (herbal)                                        | <input type="checkbox"/> | <input type="checkbox"/> → | <input type="text"/> <input type="text"/> times per week |
| Tea (caffeinated)                                   | <input type="checkbox"/> | <input type="checkbox"/> → | <input type="text"/> <input type="text"/> times per week |
| Coffee                                              | <input type="checkbox"/> | <input type="checkbox"/> → | <input type="text"/> <input type="text"/> times per week |
| A little alcohol                                    | <input type="checkbox"/> | <input type="checkbox"/> → | <input type="text"/> <input type="text"/> times per week |
| Potato chips                                        | <input type="checkbox"/> | <input type="checkbox"/> → | <input type="text"/> <input type="text"/> times per week |
| Other salty snacks                                  | <input type="checkbox"/> | <input type="checkbox"/> → | <input type="text"/> <input type="text"/> times per week |
| Chocolate                                           | <input type="checkbox"/> | <input type="checkbox"/> → | <input type="text"/> <input type="text"/> times per week |
| Sweets                                              | <input type="checkbox"/> | <input type="checkbox"/> → | <input type="text"/> <input type="text"/> times per week |
| Peanuts/ peanut butter                              | <input type="checkbox"/> | <input type="checkbox"/> → | <input type="text"/> <input type="text"/> times per week |
| Tree nuts/ tree nut butter<br>(i.e. almond, cashew) | <input type="checkbox"/> | <input type="checkbox"/> → | <input type="text"/> <input type="text"/> times per week |

PID:

|  |  |   |  |  |
|--|--|---|--|--|
|  |  | - |  |  |
|--|--|---|--|--|

Mother's Date of Birth:

|      |  |  |  |       |  |     |
|------|--|--|--|-------|--|-----|
|      |  |  |  |       |  |     |
| year |  |  |  | month |  | day |

**4 MONTHS**

---

6. Please indicate if your baby **currently** has any of the following feeding behaviours:

|                                           | No                       | Yes                      |                                         |
|-------------------------------------------|--------------------------|--------------------------|-----------------------------------------|
| Slow feeding                              | <input type="checkbox"/> | <input type="checkbox"/> |                                         |
| Taking only small quantities at each feed | <input type="checkbox"/> | <input type="checkbox"/> |                                         |
| Choking                                   | <input type="checkbox"/> | <input type="checkbox"/> |                                         |
| Hungry/ not satisfied                     | <input type="checkbox"/> | <input type="checkbox"/> |                                         |
| Refused to take breast milk               | <input type="checkbox"/> | <input type="checkbox"/> | <input type="checkbox"/> Not applicable |
| Refused to take other milk                | <input type="checkbox"/> | <input type="checkbox"/> | <input type="checkbox"/> Not applicable |
| Refused to take solids                    | <input type="checkbox"/> | <input type="checkbox"/> | <input type="checkbox"/> Not applicable |
| Can not establish feeding routine         | <input type="checkbox"/> | <input type="checkbox"/> |                                         |

7. Are you **currently** having difficulties feeding your baby?

- No, no difficulties
- Yes, some difficulties
- Yes, great difficulties

PID:   -

Mother's Date of Birth:

year month day

**4 MONTHS**

8. *Since your last study visit*, has *your baby* had an infection that required antibiotic or antifungal (anti-yeast) treatment?

- No  
 Yes → if yes, please complete the following table:

**DRUG 1**

What was the type of infection?  Thrush  Ear infection  Chest infection  
 Urinary tract infection  Other: \_\_\_\_\_

What was the name of the drug? \_\_\_\_\_

How was it given?  Topical  Oral  Other: \_\_\_\_\_

What was the start date?     /   /    
 year month day

What was the end date?     /   /   or  Still currently in use

**DRUG 2**  Only one drug was given. (Do not complete the rest of the table)

What was the type of infection?  Thrush  Ear infection  Chest infection  
 Urinary tract infection  Other: \_\_\_\_\_

What was the name of the second drug? \_\_\_\_\_

How was it given?  Topical  Oral  Other: \_\_\_\_\_

What was the start date?     /   /    
 year month day

What was the end date?     /   /   or  Still currently in use

PID:

|  |  |   |  |  |  |
|--|--|---|--|--|--|
|  |  | - |  |  |  |
|--|--|---|--|--|--|

Mother's Date of Birth:

|  |  |  |  |
|--|--|--|--|
|  |  |  |  |
|--|--|--|--|

year

|  |  |
|--|--|
|  |  |
|--|--|

month

|  |  |
|--|--|
|  |  |
|--|--|

day

**4 MONTHS**

---

9. Please list any other medications, vitamins, homeopathics or supplements that ***your baby*** has taken ***since your last study visit.***

None

| <u>Medication, vitamin or supplement name</u> | <u>Currently in Use?</u> |                          |
|-----------------------------------------------|--------------------------|--------------------------|
|                                               | <b>No</b>                | <b>Yes</b>               |
| a. _____                                      | <input type="checkbox"/> | <input type="checkbox"/> |
| b. _____                                      | <input type="checkbox"/> | <input type="checkbox"/> |
| c. _____                                      | <input type="checkbox"/> | <input type="checkbox"/> |
| d. _____                                      | <input type="checkbox"/> | <input type="checkbox"/> |
| e. _____                                      | <input type="checkbox"/> | <input type="checkbox"/> |

10. ***Since your last study visit,*** has your baby needed to stay in the hospital?

- No
- Yes

**4 MONTHS**

11. *Since your last study visit*, have *you* taken any antibiotic or antifungal (anti-yeast) medications?

- No  
 Yes → if yes, please complete the following table:

**DRUG 1**

What was the name of the drug? \_\_\_\_\_

How was it given?  Topical  Oral  Other: \_\_\_\_\_

What was the start date?     /   /    
 year month day

What was the end date?     /   /   or  Still currently in use  
 year month day

**DRUG 2**

Only one drug was taken. (Do not complete the rest of the table)

What was the name of the second drug? \_\_\_\_\_

How was it given?  Topical  Oral  Other: \_\_\_\_\_

What was the start date?     /   /    
 year month day

What was the end date?     /   /   or  Still currently in use  
 year month day

**4 MONTHS**

12. ***If you are currently breastfeeding***, please list any other prescription medications that ***you*** have taken ***since your last study visit***.

- Not currently breastfeeding
- None

| <u>Medication name</u> | <u>Currently in Use?</u> |                          |
|------------------------|--------------------------|--------------------------|
|                        | <b>No</b>                | <b>Yes</b>               |
| a. _____               | <input type="checkbox"/> | <input type="checkbox"/> |
| b. _____               | <input type="checkbox"/> | <input type="checkbox"/> |
| c. _____               | <input type="checkbox"/> | <input type="checkbox"/> |
| d. _____               | <input type="checkbox"/> | <input type="checkbox"/> |
| e. _____               | <input type="checkbox"/> | <input type="checkbox"/> |

13. How much time does your baby spend in sleep during the night (between 7 in the evening and 7 in the morning)?

hours,   minutes

14. How many times does your baby wake up during the night?

times

15. How much time during the night does your baby spend in wakefulness (from 10 in the evening to 6 in the morning)?

hours,   minutes

16. Do you consider your baby's sleep to be a problem?

- Not a problem at all
- A small problem
- A very serious problem

17. Has your baby been diagnosed with asthma or reactive airway disease by your doctor?

- Yes
- No

PID:

|  |  |   |  |  |  |
|--|--|---|--|--|--|
|  |  | - |  |  |  |
|--|--|---|--|--|--|

Mother's Date of Birth:

|      |  |  |  |       |  |     |  |
|------|--|--|--|-------|--|-----|--|
|      |  |  |  |       |  |     |  |
| year |  |  |  | month |  | day |  |

**4 MONTHS**

---

18. Does your baby take any puffers or breathing medications?

- Yes
- No

19. Have you been told by your doctor that your baby has eczema?

- Yes
- No

20. **In the last month**, has your baby experienced any of the following?: (check all that apply)

- Itchy rashes
- Itchy rashes that don't go away on the face, knuckles, elbows or knees
- Rash on the nose, mouth or diaper area
- Dry, thickened or scaly skin or more skin creases in the palms than usual
- Cracked skin around the ear
- Scaly scalp that won't go away
- Red dots surrounding hair follicles
- None of the above

21. Have you **ever** had any concerns that your baby may have an allergy?

- No
- Yes, I/we suspect(ed) an allergy
  - ↳ if yes, please describe what the allergic substance was thought to be and what made you suspect and allergy:

---



---



---

- Yes, an allergy was confirmed by the doctor
  - ↳ if yes, please indicate what the allergic substance(s) is/are:

---



---



---



**5 MONTHS – PART 1**

**Instructions:**

- This form is to be completed by research personnel at the 5 month study visit.
- Record the measurements indicated below and attach this form to "Part 2" completed by the participant.

1. Date and time of visit:     /   /   :    
 year month day 24 hour clock

2. Head circumference:   .  cm

3. Tricep skinfold thickness:

Measurement 1:   .  cm

Measurement 2:   .  cm

Measurement 3:   .  cm

4. Subscapular skinfold thickness:

Measurement 1:   .  cm

Measurement 2:   .  cm

Measurement 3:   .  cm

5. Bicep skinfold thickness:

Measurement 1:   .  cm

Measurement 2:   .  cm

Measurement 3:   .  cm

PID:

|  |  |   |  |  |  |
|--|--|---|--|--|--|
|  |  | - |  |  |  |
|--|--|---|--|--|--|

Mother's Date of Birth:

|      |  |  |  |       |  |     |  |
|------|--|--|--|-------|--|-----|--|
|      |  |  |  |       |  |     |  |
| year |  |  |  | month |  | day |  |

**5 MONTHS – PART 1**

---

6. Mid-arm circumference:

Measurement 1: 

|  |  |
|--|--|
|  |  |
|--|--|

 . 

|  |
|--|
|  |
|--|

 cm

Measurement 2: 

|  |  |
|--|--|
|  |  |
|--|--|

 . 

|  |
|--|
|  |
|--|

 cm

Measurement 3: 

|  |  |
|--|--|
|  |  |
|--|--|

 . 

|  |
|--|
|  |
|--|

 cm

7. Suprailiac skinfold thickness:

Measurement 1: 

|  |  |
|--|--|
|  |  |
|--|--|

 . 

|  |
|--|
|  |
|--|

 cm

Measurement 2: 

|  |  |
|--|--|
|  |  |
|--|--|

 . 

|  |
|--|
|  |
|--|

 cm

Measurement 3: 

|  |  |
|--|--|
|  |  |
|--|--|

 . 

|  |
|--|
|  |
|--|

 cm

8. Hip circumference:

Measurement 1: 

|  |  |
|--|--|
|  |  |
|--|--|

 . 

|  |
|--|
|  |
|--|

 cm

Measurement 2: 

|  |  |
|--|--|
|  |  |
|--|--|

 . 

|  |
|--|
|  |
|--|

 cm

Measurement 3: 

|  |  |
|--|--|
|  |  |
|--|--|

 . 

|  |
|--|
|  |
|--|

 cm

9. Abdominal circumference:

Measurement 1: 

|  |  |
|--|--|
|  |  |
|--|--|

 . 

|  |
|--|
|  |
|--|

 cm

Measurement 2: 

|  |  |
|--|--|
|  |  |
|--|--|

 . 

|  |
|--|
|  |
|--|

 cm

Measurement 3: 

|  |  |
|--|--|
|  |  |
|--|--|

 . 

|  |
|--|
|  |
|--|

 cm

10. Length: 

|  |  |  |
|--|--|--|
|  |  |  |
|--|--|--|

 . 

|  |
|--|
|  |
|--|

 cm

**5 MONTHS – PART 1**

11. Percent fat:   .  %
12. Percent fat free mass:   .  %
13. Fat mass:   .     kg
14. Fat free mass:   .     kg
15. Body mass:   .     kg
16. Body volume:   .     L
17. Body density:   .     kg/L
18. Fat mass density:   .     kg/L
19. Fat free mass density:   .     kg/L
20. Body surface area:     .  cm<sup>2</sup>
21. Thoracic gas volume:   .     L

22. The PEA POD test was:
- Completed without interruption
  - Begun but terminated early
  - Not attempted because baby exceeded capacity
  - Not attempted because parent declined

23. Were stool samples received?

- No
- Yes

↳ if yes, indicate the following:

Date Collected

- Day 3**     /   /    
 year month day
- Day 10**     /   /
- 6 Weeks**     /   /
- 12 Weeks**     /   /
- 5 Months**     /   /

**5 MONTHS – PART 2**

**Instructions:**

- Mark only one box with an "X" for each question, unless instructed to do otherwise.
- Please use your study calendar to help you remember the information asked for.
- All of your answers will remain confidential.
- If you do not understand a question, please ask a research staff member.

1. Have you **ever** breast fed your baby?

No

Yes

↳ if yes, **do you still** breastfeed your baby?

No

↳ if no, how old was your baby when you stopped breast feeding?

.  months

(fill in "0" if your baby was less than 1 month old)

Yes

↳ if yes, has your baby **ever** had anything other than breast milk or water?

No

Yes

↳ if yes, how old was your baby when he or she first had anything other than breast milk or water?

.  months

(fill in "0" if your baby was less than 1 month old)

2. Has your baby **ever** had any of the following?

|                                  | <u>No</u>                | <u>Yes</u>                 | <u>Current Use</u>                                       |
|----------------------------------|--------------------------|----------------------------|----------------------------------------------------------|
| Formula                          | <input type="checkbox"/> | <input type="checkbox"/> → | <input type="text"/> <input type="text"/> times per week |
| Soy milk                         | <input type="checkbox"/> | <input type="checkbox"/> → | <input type="text"/> <input type="text"/> times per week |
| Goat's milk                      | <input type="checkbox"/> | <input type="checkbox"/> → | <input type="text"/> <input type="text"/> times per week |
| Hypo-allergenic formula          | <input type="checkbox"/> | <input type="checkbox"/> → | <input type="text"/> <input type="text"/> times per week |
| Cow's milk                       | <input type="checkbox"/> | <input type="checkbox"/> → | <input type="text"/> <input type="text"/> times per week |
| Another type of milk or formula: | <input type="checkbox"/> | <input type="checkbox"/> → | <input type="text"/> <input type="text"/> times per week |

\_\_\_\_\_

**5 MONTHS – PART 2**

3. Has your baby ***ever*** had any of the following foods or beverages?

|                          | <u>No</u>                | <u>Yes</u>                 | <u>Current Use</u>                                       |
|--------------------------|--------------------------|----------------------------|----------------------------------------------------------|
| Rice cereal              | <input type="checkbox"/> | <input type="checkbox"/> → | <input type="text"/> <input type="text"/> times per week |
| Other cereal             | <input type="checkbox"/> | <input type="checkbox"/> → | <input type="text"/> <input type="text"/> times per week |
| Bread or toast           | <input type="checkbox"/> | <input type="checkbox"/> → | <input type="text"/> <input type="text"/> times per week |
| Baby cookies             | <input type="checkbox"/> | <input type="checkbox"/> → | <input type="text"/> <input type="text"/> times per week |
| Baked goods              | <input type="checkbox"/> | <input type="checkbox"/> → | <input type="text"/> <input type="text"/> times per week |
| Dairy products           | <input type="checkbox"/> | <input type="checkbox"/> → | <input type="text"/> <input type="text"/> times per week |
| Egg yolk                 | <input type="checkbox"/> | <input type="checkbox"/> → | <input type="text"/> <input type="text"/> times per week |
| Egg white                | <input type="checkbox"/> | <input type="checkbox"/> → | <input type="text"/> <input type="text"/> times per week |
| Meat                     | <input type="checkbox"/> | <input type="checkbox"/> → | <input type="text"/> <input type="text"/> times per week |
| Fish                     | <input type="checkbox"/> | <input type="checkbox"/> → | <input type="text"/> <input type="text"/> times per week |
| Raw vegetables           | <input type="checkbox"/> | <input type="checkbox"/> → | <input type="text"/> <input type="text"/> times per week |
| Potato                   | <input type="checkbox"/> | <input type="checkbox"/> → | <input type="text"/> <input type="text"/> times per week |
| Cooked vegetables        | <input type="checkbox"/> | <input type="checkbox"/> → | <input type="text"/> <input type="text"/> times per week |
| Legumes                  | <input type="checkbox"/> | <input type="checkbox"/> → | <input type="text"/> <input type="text"/> times per week |
| Soy products (i.e. tofu) | <input type="checkbox"/> | <input type="checkbox"/> → | <input type="text"/> <input type="text"/> times per week |
| Raw fruit                | <input type="checkbox"/> | <input type="checkbox"/> → | <input type="text"/> <input type="text"/> times per week |
| Cooked fruit             | <input type="checkbox"/> | <input type="checkbox"/> → | <input type="text"/> <input type="text"/> times per week |

**5 MONTHS – PART 2**

|                                                     | <u>No</u>                | <u>Yes</u>                 | <u>Current Use</u>                                       |
|-----------------------------------------------------|--------------------------|----------------------------|----------------------------------------------------------|
| Pop                                                 | <input type="checkbox"/> | <input type="checkbox"/> → | <input type="text"/> <input type="text"/> times per week |
| Other fizzy drinks                                  | <input type="checkbox"/> | <input type="checkbox"/> → | <input type="text"/> <input type="text"/> times per week |
| Apple juice                                         | <input type="checkbox"/> | <input type="checkbox"/> → | <input type="text"/> <input type="text"/> times per week |
| Other fruit drinks                                  | <input type="checkbox"/> | <input type="checkbox"/> → | <input type="text"/> <input type="text"/> times per week |
| Herbal drink                                        | <input type="checkbox"/> | <input type="checkbox"/> → | <input type="text"/> <input type="text"/> times per week |
| Unpasteurized milk                                  | <input type="checkbox"/> | <input type="checkbox"/> → | <input type="text"/> <input type="text"/> times per week |
| Gripe water                                         | <input type="checkbox"/> | <input type="checkbox"/> → | <input type="text"/> <input type="text"/> times per week |
| Tea (herbal)                                        | <input type="checkbox"/> | <input type="checkbox"/> → | <input type="text"/> <input type="text"/> times per week |
| Tea (caffeinated)                                   | <input type="checkbox"/> | <input type="checkbox"/> → | <input type="text"/> <input type="text"/> times per week |
| Coffee                                              | <input type="checkbox"/> | <input type="checkbox"/> → | <input type="text"/> <input type="text"/> times per week |
| A little alcohol                                    | <input type="checkbox"/> | <input type="checkbox"/> → | <input type="text"/> <input type="text"/> times per week |
| Potato chips                                        | <input type="checkbox"/> | <input type="checkbox"/> → | <input type="text"/> <input type="text"/> times per week |
| Other salty snacks                                  | <input type="checkbox"/> | <input type="checkbox"/> → | <input type="text"/> <input type="text"/> times per week |
| Chocolate                                           | <input type="checkbox"/> | <input type="checkbox"/> → | <input type="text"/> <input type="text"/> times per week |
| Sweets                                              | <input type="checkbox"/> | <input type="checkbox"/> → | <input type="text"/> <input type="text"/> times per week |
| Peanuts/ peanut butter                              | <input type="checkbox"/> | <input type="checkbox"/> → | <input type="text"/> <input type="text"/> times per week |
| Tree nuts/ tree nut butter<br>(i.e. almond, cashew) | <input type="checkbox"/> | <input type="checkbox"/> → | <input type="text"/> <input type="text"/> times per week |

PID:

|  |  |   |  |  |  |
|--|--|---|--|--|--|
|  |  | - |  |  |  |
|--|--|---|--|--|--|

Mother's Date of Birth:

|      |  |  |  |       |  |     |  |
|------|--|--|--|-------|--|-----|--|
|      |  |  |  |       |  |     |  |
| year |  |  |  | month |  | day |  |

**5 MONTHS – PART 2**

---

4. Please indicate if your baby **currently** has any of the following feeding behaviours:

|                                           | No                       | Yes                      |                                         |
|-------------------------------------------|--------------------------|--------------------------|-----------------------------------------|
| Slow feeding                              | <input type="checkbox"/> | <input type="checkbox"/> |                                         |
| Taking only small quantities at each feed | <input type="checkbox"/> | <input type="checkbox"/> |                                         |
| Choking                                   | <input type="checkbox"/> | <input type="checkbox"/> |                                         |
| Hungry/ not satisfied                     | <input type="checkbox"/> | <input type="checkbox"/> |                                         |
| Refused to take breast milk               | <input type="checkbox"/> | <input type="checkbox"/> | <input type="checkbox"/> Not applicable |
| Refused to take other milk                | <input type="checkbox"/> | <input type="checkbox"/> | <input type="checkbox"/> Not applicable |
| Refused to take solids                    | <input type="checkbox"/> | <input type="checkbox"/> | <input type="checkbox"/> Not applicable |
| Can not establish feeding routine         | <input type="checkbox"/> | <input type="checkbox"/> |                                         |

5. Are you **currently** having difficulties feeding your baby?

- No, no difficulties
- Yes, some difficulties
- Yes, great difficulties

6. **During the past week**, how often did your baby usually spit-up (anything coming out of the mouth) during a 24-hour period?

- Less than once
- 1 to 3 times
- 4 to 6 times
- More than 6 times

7. **During the past week**, how much did your baby usually spit-up (anything coming out of the mouth) during a typical episode?

- Did not spit up
- Less than 1 tablespoonful
- 1 tablespoonful to 2 ounces
- More than 2 ounces to half the feeding
- More than half the feeding

PID:

|  |  |   |  |  |  |
|--|--|---|--|--|--|
|  |  | - |  |  |  |
|--|--|---|--|--|--|

Mother's Date of Birth:

|      |  |  |  |       |  |     |  |
|------|--|--|--|-------|--|-----|--|
|      |  |  |  |       |  |     |  |
| year |  |  |  | month |  | day |  |

**5 MONTHS – PART 2**

---

8. **During the past week**, how often did spitting up (anything coming out of the mouth) seem to be uncomfortable for your baby, for example, crying, fussing, irritability, etc?

- Never
- Rarely
- Sometimes
- Often
- Always

9. **During the past week**, how often did your baby refuse a feeding even when hungry?

- Never
- Rarely
- Sometimes
- Often
- Always

10. **During the past week**, how often did your baby stop eating soon after starting even when hungry?

- Never
- Rarely
- Sometimes
- Often
- Always

11. **During the past week**, did your baby cry a lot during or within 1 hour after feedings?

- Never
- Rarely
- Sometimes
- Often
- Always

12. **During the past week**, did your baby cry or fuss more than usual?

- Never
- Rarely
- Sometimes
- Often
- Always



PID:

|  |  |   |  |  |  |
|--|--|---|--|--|--|
|  |  | - |  |  |  |
|--|--|---|--|--|--|

Mother's Date of Birth:

|      |  |  |  |       |  |     |  |
|------|--|--|--|-------|--|-----|--|
|      |  |  |  |       |  |     |  |
| year |  |  |  | month |  | day |  |

**5 MONTHS – PART 2**

---

13. **During the past week**, on average how long did your baby cry or fuss during a 24 hour period?

- Less than 10 minutes
- 10 minutes to 1 hour
- More than 1 hour but less than 3 hours
- 3 or more hours

14. **During the past week**, how often did your baby have hiccups?

- Never
- Rarely
- Sometimes
- Often
- Always

15. **During the past week**, how often did your baby have episodes of arching back?

- Never
- Rarely
- Sometimes
- Often
- Always

16. **During the past week**, has your baby stopped breathing while awake or struggled to breathe?

- No
- Yes

17. **During the past week**, has your baby turned blue or purple?

- No
- Yes

PID:

|  |  |   |  |  |  |
|--|--|---|--|--|--|
|  |  | - |  |  |  |
|--|--|---|--|--|--|

Mother's Date of Birth:

|  |  |  |  |
|--|--|--|--|
|  |  |  |  |
|--|--|--|--|

year

|  |  |
|--|--|
|  |  |
|--|--|

month

|  |  |
|--|--|
|  |  |
|--|--|

day

**5 MONTHS – PART 2**

---

18. **In the last month**, have you noted your baby straining for 10 minutes or longer before successful passage of stool?

No

Yes

↳ if yes, how many times per week?

|  |  |
|--|--|
|  |  |
|--|--|

times

19. Does your baby typically have **at least one** bowel movement every day?

No

↳ if no, how many bowel movements does your baby have in a **typical week**?

|  |  |
|--|--|
|  |  |
|--|--|

bowel movements

Yes

↳ if yes, how many bowel movements does your baby have in a **typical day**?

|  |  |
|--|--|
|  |  |
|--|--|

bowel movements

20. **In the last month**, has your baby had any episodes of abdominal pain or discomfort?

No

Yes

21. **Since your last study visit or phone call**, has your baby needed to stay in the hospital?

No

Yes

PID:   -

Mother's Date of Birth:

year month day

**5 MONTHS – PART 2**

---

22. *Since your last study visit or phone call, has your baby had an infection that required antibiotic or antifungal (anti-yeast) treatment?*

- No
- Yes → if yes, please complete the following table:

**DRUG 1**

What was the type of infection?  Thrush  Ear infection  Chest infection  
 Urinary tract infection  Other: \_\_\_\_\_

What was the name of the drug? \_\_\_\_\_

How was it given?  Topical  Oral  Other: \_\_\_\_\_

What was the start date?     /   /    
 year month day

What was the end date?     /   /   or  Still currently in use

**DRUG 2**  Only one drug was given. (Do not complete the rest of the table)

What was the type of infection?  Thrush  Ear infection  Chest infection  
 Urinary tract infection  Other: \_\_\_\_\_

What was the name of the second drug? \_\_\_\_\_

How was it given?  Topical  Oral  Other: \_\_\_\_\_

What was the start date?     /   /    
 year month day

What was the end date?     /   /   or  Still currently in use

---

PID:

|  |  |   |  |  |
|--|--|---|--|--|
|  |  | - |  |  |
|--|--|---|--|--|

Mother's Date of Birth:

|  |  |  |  |
|--|--|--|--|
|  |  |  |  |
|--|--|--|--|

year

|  |  |
|--|--|
|  |  |
|--|--|

month

|  |  |
|--|--|
|  |  |
|--|--|

day

**5 MONTHS – PART 2**

---

23. Please list any other medications, vitamins, homeopathics or supplements that ***your baby*** has taken ***since your last study visit or phone call.***

None

| <u>Medication, vitamin or supplement name</u> | <u>Currently in Use?</u> |                          |
|-----------------------------------------------|--------------------------|--------------------------|
|                                               | No                       | Yes                      |
| a. _____                                      | <input type="checkbox"/> | <input type="checkbox"/> |
| b. _____                                      | <input type="checkbox"/> | <input type="checkbox"/> |
| c. _____                                      | <input type="checkbox"/> | <input type="checkbox"/> |
| d. _____                                      | <input type="checkbox"/> | <input type="checkbox"/> |
| e. _____                                      | <input type="checkbox"/> | <input type="checkbox"/> |

PID:   -

Mother's Date of Birth:

year month day

**5 MONTHS – PART 2**

24. *Since your last study visit or phone call*, have **you** taken any antibiotic or antifungal (anti-yeast) medications?

- No
- Yes → if yes, please complete the following table:

**DRUG 1**

What was the name of the drug? \_\_\_\_\_

How was it given?  Topical  Oral  Other: \_\_\_\_\_

What was the start date?     /   /    
 year month day

What was the end date?     /   /   or  Still currently in use

**DRUG 2**  Only one drug was taken. (Do not complete the rest of the table)

What was the name of the second drug? \_\_\_\_\_

How was it given?  Topical  Oral  Other: \_\_\_\_\_

What was the start date?     /   /    
 year month day

What was the end date?     /   /   or  Still currently in use

**5 MONTHS – PART 2**

25. **If you are currently breastfeeding**, please list any other prescription medications that **you** have taken **since your last study visit or phone call**.

- Not currently breastfeeding
- None

| <u>Medication name</u> | <u>Currently in Use?</u> |                          |
|------------------------|--------------------------|--------------------------|
|                        | <b>No</b>                | <b>Yes</b>               |
| a. _____               | <input type="checkbox"/> | <input type="checkbox"/> |
| b. _____               | <input type="checkbox"/> | <input type="checkbox"/> |
| c. _____               | <input type="checkbox"/> | <input type="checkbox"/> |
| d. _____               | <input type="checkbox"/> | <input type="checkbox"/> |
| e. _____               | <input type="checkbox"/> | <input type="checkbox"/> |

26. How much time does your baby spend in sleep during the night (between 7 in the evening and 7 in the morning)?

hours,   minutes

27. How many times does your baby wake up during the night?

times

28. How much time during the night does your baby spend in wakefulness (from 10 in the evening to 6 in the morning)?

hours,   minutes

29. Do you consider your baby's sleep to be a problem?

- Not a problem at all
- A small problem
- A very serious problem

30. Has your baby been diagnosed with asthma or reactive airway disease by your doctor?

- Yes
- No

PID:

|  |  |   |  |  |  |
|--|--|---|--|--|--|
|  |  | - |  |  |  |
|--|--|---|--|--|--|

Mother's Date of Birth:

|      |  |  |  |       |  |     |  |
|------|--|--|--|-------|--|-----|--|
|      |  |  |  |       |  |     |  |
| year |  |  |  | month |  | day |  |

**5 MONTHS – PART 2**

---

31. Does your baby take any puffers or breathing medications?

- Yes
- No

32. Have you been told by your doctor that your baby has eczema?

- Yes
- No

33. ***In the last month***, Has your baby experienced any of the following?: (check all that apply)

- Itchy rashes
- Itchy rashes that don't go away on the face, knuckles, elbows or knees
- Rash on the nose, mouth or diaper area
- Dry, thickened or scaly skin or more skin creases in the palms than usual
- Cracked skin around the ear
- Scaly scalp that won't go away
- Red dots surrounding hair follicles
- None of the above

34. Have you ***ever*** had any concerns that your baby may have an allergy?

- No
- Yes, I/we suspect(ed) an allergy

↳ if yes, please describe what the allergic substance was thought to be and what made you suspect and allergy:

---



---



---

- Yes, an allergy was confirmed by the doctor

↳ if yes, please indicate what the allergic substance(s) is/are:

---



---



---

PID:   -

Mother's Date of Birth:

/   /    
 year month day

Month of contact: 6 8 10

**6, 8 AND 10 MONTHS - TELEPHONE**

**Instructions:**

- This form is to be completed by research personnel through telephone contact with participants at 6, 8 and 10 months postpartum.
- Please refer to previous forms to appropriately prompt and ensure consistency for questions 3-5, 9, 12 and 21.

1. Was the follow up contact completed?

- No  
 Yes

2. Date:

/   /    
 year month day

3. Have you **ever** breast fed your baby?

- No  
 Yes

↳ if yes, **do you still** breastfeed your baby?

No

↳ if no, how old was your baby when you stopped breast feeding?

.  months

(fill in "0" if your baby was less than 1 month old)

Yes

↳ if yes, has your baby **ever** had anything other than breast milk or water?

No

Yes

↳ if yes, how old was your baby when he or she first had anything other than breast milk or water?

.  months

(fill in "0" if your baby was less than 1 month old)



PID:   -

Mother's Date of Birth:

year month day

Month of contact: 6 8 10

**6, 8 AND 10 MONTHS - TELEPHONE**

---

4. Has your baby ***ever*** had any of the following?

|                                           | <u>No</u>                | <u>Yes</u>                 | <u>Current Use</u>                                       |
|-------------------------------------------|--------------------------|----------------------------|----------------------------------------------------------|
| Formula                                   | <input type="checkbox"/> | <input type="checkbox"/> → | <input type="text"/> <input type="text"/> times per week |
| Soy milk                                  | <input type="checkbox"/> | <input type="checkbox"/> → | <input type="text"/> <input type="text"/> times per week |
| Goat's milk                               | <input type="checkbox"/> | <input type="checkbox"/> → | <input type="text"/> <input type="text"/> times per week |
| Hypo-allergenic formula                   | <input type="checkbox"/> | <input type="checkbox"/> → | <input type="text"/> <input type="text"/> times per week |
| Cow's milk                                | <input type="checkbox"/> | <input type="checkbox"/> → | <input type="text"/> <input type="text"/> times per week |
| Another type of milk or formula:<br>_____ | <input type="checkbox"/> | <input type="checkbox"/> → | <input type="text"/> <input type="text"/> times per week |

**6, 8 AND 10 MONTHS - TELEPHONE**


---

 5. Has your baby **ever** had any of the following foods or beverages?

|                          | <u>No</u>                | <u>Yes</u>                 | <u>Current Use</u>                                       |
|--------------------------|--------------------------|----------------------------|----------------------------------------------------------|
| Rice cereal              | <input type="checkbox"/> | <input type="checkbox"/> → | <input type="text"/> <input type="text"/> times per week |
| Other cereal             | <input type="checkbox"/> | <input type="checkbox"/> → | <input type="text"/> <input type="text"/> times per week |
| Bread or toast           | <input type="checkbox"/> | <input type="checkbox"/> → | <input type="text"/> <input type="text"/> times per week |
| Baby cookies             | <input type="checkbox"/> | <input type="checkbox"/> → | <input type="text"/> <input type="text"/> times per week |
| Baked goods              | <input type="checkbox"/> | <input type="checkbox"/> → | <input type="text"/> <input type="text"/> times per week |
| Dairy products           | <input type="checkbox"/> | <input type="checkbox"/> → | <input type="text"/> <input type="text"/> times per week |
| Egg yolk                 | <input type="checkbox"/> | <input type="checkbox"/> → | <input type="text"/> <input type="text"/> times per week |
| Egg white                | <input type="checkbox"/> | <input type="checkbox"/> → | <input type="text"/> <input type="text"/> times per week |
| Meat                     | <input type="checkbox"/> | <input type="checkbox"/> → | <input type="text"/> <input type="text"/> times per week |
| Fish                     | <input type="checkbox"/> | <input type="checkbox"/> → | <input type="text"/> <input type="text"/> times per week |
| Raw vegetables           | <input type="checkbox"/> | <input type="checkbox"/> → | <input type="text"/> <input type="text"/> times per week |
| Potato                   | <input type="checkbox"/> | <input type="checkbox"/> → | <input type="text"/> <input type="text"/> times per week |
| Cooked vegetables        | <input type="checkbox"/> | <input type="checkbox"/> → | <input type="text"/> <input type="text"/> times per week |
| Legumes                  | <input type="checkbox"/> | <input type="checkbox"/> → | <input type="text"/> <input type="text"/> times per week |
| Soy products (i.e. tofu) | <input type="checkbox"/> | <input type="checkbox"/> → | <input type="text"/> <input type="text"/> times per week |
| Raw fruit                | <input type="checkbox"/> | <input type="checkbox"/> → | <input type="text"/> <input type="text"/> times per week |
| Cooked fruit             | <input type="checkbox"/> | <input type="checkbox"/> → | <input type="text"/> <input type="text"/> times per week |

**6, 8 AND 10 MONTHS - TELEPHONE**

|                                                     | <u>No</u>                | <u>Yes</u>                 | <u>Current Use</u>                                       |
|-----------------------------------------------------|--------------------------|----------------------------|----------------------------------------------------------|
| Pop                                                 | <input type="checkbox"/> | <input type="checkbox"/> → | <input type="text"/> <input type="text"/> times per week |
| Other fizzy drinks                                  | <input type="checkbox"/> | <input type="checkbox"/> → | <input type="text"/> <input type="text"/> times per week |
| Apple juice                                         | <input type="checkbox"/> | <input type="checkbox"/> → | <input type="text"/> <input type="text"/> times per week |
| Other fruit drinks                                  | <input type="checkbox"/> | <input type="checkbox"/> → | <input type="text"/> <input type="text"/> times per week |
| Herbal drink                                        | <input type="checkbox"/> | <input type="checkbox"/> → | <input type="text"/> <input type="text"/> times per week |
| Unpasteurized milk                                  | <input type="checkbox"/> | <input type="checkbox"/> → | <input type="text"/> <input type="text"/> times per week |
| Gripe water                                         | <input type="checkbox"/> | <input type="checkbox"/> → | <input type="text"/> <input type="text"/> times per week |
| Tea (herbal)                                        | <input type="checkbox"/> | <input type="checkbox"/> → | <input type="text"/> <input type="text"/> times per week |
| Tea (caffeinated)                                   | <input type="checkbox"/> | <input type="checkbox"/> → | <input type="text"/> <input type="text"/> times per week |
| Coffee                                              | <input type="checkbox"/> | <input type="checkbox"/> → | <input type="text"/> <input type="text"/> times per week |
| A little alcohol                                    | <input type="checkbox"/> | <input type="checkbox"/> → | <input type="text"/> <input type="text"/> times per week |
| Potato chips                                        | <input type="checkbox"/> | <input type="checkbox"/> → | <input type="text"/> <input type="text"/> times per week |
| Other salty snacks                                  | <input type="checkbox"/> | <input type="checkbox"/> → | <input type="text"/> <input type="text"/> times per week |
| Chocolate                                           | <input type="checkbox"/> | <input type="checkbox"/> → | <input type="text"/> <input type="text"/> times per week |
| Sweets                                              | <input type="checkbox"/> | <input type="checkbox"/> → | <input type="text"/> <input type="text"/> times per week |
| Peanuts/ peanut butter                              | <input type="checkbox"/> | <input type="checkbox"/> → | <input type="text"/> <input type="text"/> times per week |
| Tree nuts/ tree nut butter<br>(i.e. almond, cashew) | <input type="checkbox"/> | <input type="checkbox"/> → | <input type="text"/> <input type="text"/> times per week |

PID:

|  |  |   |  |  |
|--|--|---|--|--|
|  |  | - |  |  |
|--|--|---|--|--|

Mother's Date of Birth:

|      |  |  |  |       |  |     |
|------|--|--|--|-------|--|-----|
|      |  |  |  |       |  |     |
| year |  |  |  | month |  | day |

Month of contact: 6 8 10

**6, 8 AND 10 MONTHS - TELEPHONE**

---

6. Please indicate if your baby **currently** has any of the following feeding behaviours:

|                                           | No                       | Yes                      |                                         |
|-------------------------------------------|--------------------------|--------------------------|-----------------------------------------|
| Slow feeding                              | <input type="checkbox"/> | <input type="checkbox"/> |                                         |
| Taking only small quantities at each feed | <input type="checkbox"/> | <input type="checkbox"/> |                                         |
| Choking                                   | <input type="checkbox"/> | <input type="checkbox"/> |                                         |
| Hungry/ not satisfied                     | <input type="checkbox"/> | <input type="checkbox"/> |                                         |
| Refused to take breast milk               | <input type="checkbox"/> | <input type="checkbox"/> | <input type="checkbox"/> Not applicable |
| Refused to take other milk                | <input type="checkbox"/> | <input type="checkbox"/> | <input type="checkbox"/> Not applicable |
| Refused to take solids                    | <input type="checkbox"/> | <input type="checkbox"/> | <input type="checkbox"/> Not applicable |
| Can not establish feeding routine         | <input type="checkbox"/> | <input type="checkbox"/> |                                         |

7. Are you **currently** having difficulties feeding your baby?

- No, no difficulties
- Yes, some difficulties
- Yes, great difficulties

PID:   -

Mother's Date of Birth:          
 year month day

Month of contact: 6 8 10

**6, 8 AND 10 MONTHS - TELEPHONE**

8. *Since your last study visit or phone call*, has *your baby* had an infection that required antibiotic or antifungal (anti-yeast) treatment?

- No  
 Yes → if yes, please complete the following table:

**DRUG 1**

What was the type of infection?  Thrush  Ear infection  Chest infection  
 Urinary tract infection  Other: \_\_\_\_\_

What was the name of the drug? \_\_\_\_\_

How was it given?  Topical  Oral  Other: \_\_\_\_\_

What was the start date?     /   /    
 year month day

What was the end date?     /   /   or  Still currently in use  
 year month day

**DRUG 2**  Only one drug was given. (Do not complete the rest of the table)

What was the type of infection?  Thrush  Ear infection  Chest infection  
 Urinary tract infection  Other: \_\_\_\_\_

What was the name of the second drug? \_\_\_\_\_

How was it given?  Topical  Oral  Other: \_\_\_\_\_

What was the start date?     /   /    
 year month day

What was the end date?     /   /   or  Still currently in use  
 year month day

PID:   -

Mother's Date of Birth:

year month day

Month of contact: 6 8 10

**6, 8 AND 10 MONTHS - TELEPHONE**

---

9. Please list any other medications, vitamins, homeopathics or supplements that ***your baby*** has taken ***since your last study visit or phone call.***

None

| <u>Medication, vitamin or supplement name</u> | <u>Currently in Use?</u> |                          |
|-----------------------------------------------|--------------------------|--------------------------|
|                                               | <b>No</b>                | <b>Yes</b>               |
| a. _____                                      | <input type="checkbox"/> | <input type="checkbox"/> |
| b. _____                                      | <input type="checkbox"/> | <input type="checkbox"/> |
| c. _____                                      | <input type="checkbox"/> | <input type="checkbox"/> |
| d. _____                                      | <input type="checkbox"/> | <input type="checkbox"/> |
| e. _____                                      | <input type="checkbox"/> | <input type="checkbox"/> |

10. ***Since your last study visit or phone call,*** has your baby needed to stay in the hospital?

- No
- Yes

PID:   -

Mother's Date of Birth:

year month day

Month of contact: 6 8 10

**6, 8 AND 10 MONTHS - TELEPHONE**

11. *Since your last study visit or phone call*, have *you* taken any antibiotic or antifungal (anti-yeast) medications?

- No
- Yes → if yes, please complete the following table:

**DRUG 1**

What was the name of the drug? \_\_\_\_\_

How was it given?  Topical  Oral  Other: \_\_\_\_\_

What was the start date?     /   /    
 year month day

What was the end date?     /   /   or  Still currently in use

**DRUG 2**  Only one drug was taken. (Do not complete the rest of the table)

What was the name of the second drug? \_\_\_\_\_

How was it given?  Topical  Oral  Other: \_\_\_\_\_

What was the start date?     /   /    
 year month day

What was the end date?     /   /   or  Still currently in use

PID:   -

Mother's Date of Birth:          
 year month day

Month of contact: 6 8 10

**6, 8 AND 10 MONTHS - TELEPHONE**

12. If you are currently breastfeeding, please list any other prescription medications that **you** have taken **since your last study visit or phone call.**

- Not currently breastfeeding
- None

| <u>Medication name</u> | <u>Currently in Use?</u> |                          |
|------------------------|--------------------------|--------------------------|
|                        | No                       | Yes                      |
| a. _____               | <input type="checkbox"/> | <input type="checkbox"/> |
| b. _____               | <input type="checkbox"/> | <input type="checkbox"/> |
| c. _____               | <input type="checkbox"/> | <input type="checkbox"/> |
| d. _____               | <input type="checkbox"/> | <input type="checkbox"/> |
| e. _____               | <input type="checkbox"/> | <input type="checkbox"/> |

13. How much time does your baby spend in sleep during the night (between 7 in the evening and 7 in the morning)?

hours,   minutes

14. How many times does your baby wake up during the night?

times

15. How much time during the night does your baby spend in wakefulness (from 10 in the evening to 6 in the morning)?

hours,   minutes

16. Do you consider your baby's sleep to be a problem?

- Not a problem at all
- A small problem
- A very serious problem

17. Has your baby been diagnosed with asthma or reactive airway disease by your doctor?

- Yes
- No



PID:   -

Mother's Date of Birth:          
year month day

Month of contact: 6 8 10

**6, 8 AND 10 MONTHS - TELEPHONE**

---

18. Does your baby take any puffers or breathing medications?

- Yes
- No

19. Have you been told by your doctor that your baby has eczema?

- Yes
- No

20. ***In the last month***, has your baby experienced any of the following?: (check all that apply)

- Itchy rashes
- Itchy rashes that don't go away on the face, knuckles, elbows or knees
- Rash on the nose, mouth or diaper area
- Dry, thickened or scaly skin or more skin creases in the palms than usual
- Cracked skin around the ear
- Scaly scalp that won't go away
- Red dots surrounding hair follicles
- None of the above

21. Have you ***ever*** had any concerns that your baby may have an allergy?

- No
- Yes, I/we suspect(ed) an allergy

↳ if yes, please describe what the allergic substance was thought to be and what made you suspect and allergy:

---

---

---

- Yes, an allergy was confirmed by the doctor

↳ if yes, please indicate what the allergic substance(s) is/are:

---

---

---

**1 YEAR – PART 1**

**Instructions:**

- This form is to be completed by research personnel at the 1 year study visit.
- Record the measurements indicated below and attach this form to "Part 2" completed by the participant.

1. Date and time of visit:     /   /   :    
 year month day 24 hour clock

2. Head circumference:   .  cm

3. Tricep skinfold thickness:

Measurement 1:   .  cm

Measurement 2:   .  cm

Measurement 3:   .  cm

4. Subscapular skinfold thickness:

Measurement 1:   .  cm

Measurement 2:   .  cm

Measurement 3:   .  cm

5. Bicep skinfold thickness:

Measurement 1:   .  cm

Measurement 2:   .  cm

Measurement 3:   .  cm

|  |  |   |  |  |  |
|--|--|---|--|--|--|
|  |  | - |  |  |  |
|--|--|---|--|--|--|

|      |  |  |  |       |  |     |  |  |
|------|--|--|--|-------|--|-----|--|--|
|      |  |  |  |       |  |     |  |  |
| year |  |  |  | month |  | day |  |  |

**1 YEAR – PART 1**

---

6. Mid-arm circumference:

Measurement 1: 

|  |  |
|--|--|
|  |  |
|--|--|

 . 

|  |
|--|
|  |
|--|

 cm

Measurement 2: 

|  |  |
|--|--|
|  |  |
|--|--|

 . 

|  |
|--|
|  |
|--|

 cm

Measurement 3: 

|  |  |
|--|--|
|  |  |
|--|--|

 . 

|  |
|--|
|  |
|--|

 cm

7. Suprailiac skinfold thickness:

Measurement 1: 

|  |  |
|--|--|
|  |  |
|--|--|

 . 

|  |
|--|
|  |
|--|

 cm

Measurement 2: 

|  |  |
|--|--|
|  |  |
|--|--|

 . 

|  |
|--|
|  |
|--|

 cm

Measurement 3: 

|  |  |
|--|--|
|  |  |
|--|--|

 . 

|  |
|--|
|  |
|--|

 cm

8. Hip circumference:

Measurement 1: 

|  |  |
|--|--|
|  |  |
|--|--|

 . 

|  |
|--|
|  |
|--|

 cm

Measurement 2: 

|  |  |
|--|--|
|  |  |
|--|--|

 . 

|  |
|--|
|  |
|--|

 cm

Measurement 3: 

|  |  |
|--|--|
|  |  |
|--|--|

 . 

|  |
|--|
|  |
|--|

 cm

9. Abdominal circumference:

Measurement 1: 

|  |  |
|--|--|
|  |  |
|--|--|

 . 

|  |
|--|
|  |
|--|

 cm

Measurement 2: 

|  |  |
|--|--|
|  |  |
|--|--|

 . 

|  |
|--|
|  |
|--|

 cm

Measurement 3: 

|  |  |
|--|--|
|  |  |
|--|--|

 . 

|  |
|--|
|  |
|--|

 cm

10. Length: 

|  |  |  |
|--|--|--|
|  |  |  |
|--|--|--|

 . 

|  |
|--|
|  |
|--|

 cm

11. Body mass: 

|  |  |
|--|--|
|  |  |
|--|--|

 . 

|  |
|--|
|  |
|--|

 kg

**1 YEAR – PART 1**

---

12. Were stool samples received?

No

Yes

↳ if yes, indicate the following:

Date Collected

|                 |                                                                                     |   |                                           |   |                                           |
|-----------------|-------------------------------------------------------------------------------------|---|-------------------------------------------|---|-------------------------------------------|
| <b>Day 3</b>    | <input type="text"/> <input type="text"/> <input type="text"/> <input type="text"/> | / | <input type="text"/> <input type="text"/> | / | <input type="text"/> <input type="text"/> |
|                 | year                                                                                |   | month                                     |   | day                                       |
| <b>Day 10</b>   | <input type="text"/> <input type="text"/> <input type="text"/> <input type="text"/> | / | <input type="text"/> <input type="text"/> | / | <input type="text"/> <input type="text"/> |
| <b>6 Weeks</b>  | <input type="text"/> <input type="text"/> <input type="text"/> <input type="text"/> | / | <input type="text"/> <input type="text"/> | / | <input type="text"/> <input type="text"/> |
| <b>12 Weeks</b> | <input type="text"/> <input type="text"/> <input type="text"/> <input type="text"/> | / | <input type="text"/> <input type="text"/> | / | <input type="text"/> <input type="text"/> |
| <b>5 Months</b> | <input type="text"/> <input type="text"/> <input type="text"/> <input type="text"/> | / | <input type="text"/> <input type="text"/> | / | <input type="text"/> <input type="text"/> |
| <b>1 Year</b>   | <input type="text"/> <input type="text"/> <input type="text"/> <input type="text"/> | / | <input type="text"/> <input type="text"/> | / | <input type="text"/> <input type="text"/> |

**1 YEAR – PART 2**

**Instructions:**

- Mark only one box with an "X" for each question, unless instructed to do otherwise.
- Please use your study diary to help you remember the information asked for.
- All of your answers will remain confidential.
- If you do not understand a question, please ask a research staff member.

1. Have you **ever** breast fed your baby?

No

Yes

↳ if yes, **do you still** breastfeed your baby?

No

↳ if no, how old was your baby when you stopped breast feeding?

.  months

(fill in "0" if your baby was less than 1 month old)

Yes

↳ if yes, has your baby **ever** had anything other than breast milk or water?

No

Yes

↳ if yes, how old was your baby when she or he first had anything other than breast milk or water?

.  months

(fill in "0" if your baby was less than 1 month old)

2. Has your baby **ever** had any of the following?

|                                  | <u>No</u>                | <u>Yes</u>                 | <u>Current Use</u>                                       |
|----------------------------------|--------------------------|----------------------------|----------------------------------------------------------|
| Formula                          | <input type="checkbox"/> | <input type="checkbox"/> → | <input type="text"/> <input type="text"/> times per week |
| Soy milk                         | <input type="checkbox"/> | <input type="checkbox"/> → | <input type="text"/> <input type="text"/> times per week |
| Goat's milk                      | <input type="checkbox"/> | <input type="checkbox"/> → | <input type="text"/> <input type="text"/> times per week |
| Hypo-allergenic formula          | <input type="checkbox"/> | <input type="checkbox"/> → | <input type="text"/> <input type="text"/> times per week |
| Cow's milk                       | <input type="checkbox"/> | <input type="checkbox"/> → | <input type="text"/> <input type="text"/> times per week |
| Another type of milk or formula: | <input type="checkbox"/> | <input type="checkbox"/> → | <input type="text"/> <input type="text"/> times per week |

**1 YEAR – PART 2**

3. Has your baby ***ever*** had any of the following foods or beverages?

|                          | <u>No</u>                | <u>Yes</u>                 | <u>Current Use</u>                                       |
|--------------------------|--------------------------|----------------------------|----------------------------------------------------------|
| Rice cereal              | <input type="checkbox"/> | <input type="checkbox"/> → | <input type="text"/> <input type="text"/> times per week |
| Other cereal             | <input type="checkbox"/> | <input type="checkbox"/> → | <input type="text"/> <input type="text"/> times per week |
| Bread or toast           | <input type="checkbox"/> | <input type="checkbox"/> → | <input type="text"/> <input type="text"/> times per week |
| Baby cookies             | <input type="checkbox"/> | <input type="checkbox"/> → | <input type="text"/> <input type="text"/> times per week |
| Baked goods              | <input type="checkbox"/> | <input type="checkbox"/> → | <input type="text"/> <input type="text"/> times per week |
| Dairy products           | <input type="checkbox"/> | <input type="checkbox"/> → | <input type="text"/> <input type="text"/> times per week |
| Egg yolk                 | <input type="checkbox"/> | <input type="checkbox"/> → | <input type="text"/> <input type="text"/> times per week |
| Egg white                | <input type="checkbox"/> | <input type="checkbox"/> → | <input type="text"/> <input type="text"/> times per week |
| Meat                     | <input type="checkbox"/> | <input type="checkbox"/> → | <input type="text"/> <input type="text"/> times per week |
| Fish                     | <input type="checkbox"/> | <input type="checkbox"/> → | <input type="text"/> <input type="text"/> times per week |
| Raw vegetables           | <input type="checkbox"/> | <input type="checkbox"/> → | <input type="text"/> <input type="text"/> times per week |
| Potato                   | <input type="checkbox"/> | <input type="checkbox"/> → | <input type="text"/> <input type="text"/> times per week |
| Cooked vegetables        | <input type="checkbox"/> | <input type="checkbox"/> → | <input type="text"/> <input type="text"/> times per week |
| Legumes                  | <input type="checkbox"/> | <input type="checkbox"/> → | <input type="text"/> <input type="text"/> times per week |
| Soy products (i.e. tofu) | <input type="checkbox"/> | <input type="checkbox"/> → | <input type="text"/> <input type="text"/> times per week |
| Raw fruit                | <input type="checkbox"/> | <input type="checkbox"/> → | <input type="text"/> <input type="text"/> times per week |
| Cooked fruit             | <input type="checkbox"/> | <input type="checkbox"/> → | <input type="text"/> <input type="text"/> times per week |

**1 YEAR – PART 2**

|                                                     | <u>No</u>                | <u>Yes</u>                 | <u>Current Use</u>                                       |
|-----------------------------------------------------|--------------------------|----------------------------|----------------------------------------------------------|
| Pop                                                 | <input type="checkbox"/> | <input type="checkbox"/> → | <input type="text"/> <input type="text"/> times per week |
| Other fizzy drinks                                  | <input type="checkbox"/> | <input type="checkbox"/> → | <input type="text"/> <input type="text"/> times per week |
| Apple juice                                         | <input type="checkbox"/> | <input type="checkbox"/> → | <input type="text"/> <input type="text"/> times per week |
| Other fruit drinks                                  | <input type="checkbox"/> | <input type="checkbox"/> → | <input type="text"/> <input type="text"/> times per week |
| Herbal drink                                        | <input type="checkbox"/> | <input type="checkbox"/> → | <input type="text"/> <input type="text"/> times per week |
| Unpasteurized milk                                  | <input type="checkbox"/> | <input type="checkbox"/> → | <input type="text"/> <input type="text"/> times per week |
| Gripe water                                         | <input type="checkbox"/> | <input type="checkbox"/> → | <input type="text"/> <input type="text"/> times per week |
| Tea (herbal)                                        | <input type="checkbox"/> | <input type="checkbox"/> → | <input type="text"/> <input type="text"/> times per week |
| Tea (caffeinated)                                   | <input type="checkbox"/> | <input type="checkbox"/> → | <input type="text"/> <input type="text"/> times per week |
| Coffee                                              | <input type="checkbox"/> | <input type="checkbox"/> → | <input type="text"/> <input type="text"/> times per week |
| A little alcohol                                    | <input type="checkbox"/> | <input type="checkbox"/> → | <input type="text"/> <input type="text"/> times per week |
| Potato chips                                        | <input type="checkbox"/> | <input type="checkbox"/> → | <input type="text"/> <input type="text"/> times per week |
| Other salty snacks                                  | <input type="checkbox"/> | <input type="checkbox"/> → | <input type="text"/> <input type="text"/> times per week |
| Chocolate                                           | <input type="checkbox"/> | <input type="checkbox"/> → | <input type="text"/> <input type="text"/> times per week |
| Sweets                                              | <input type="checkbox"/> | <input type="checkbox"/> → | <input type="text"/> <input type="text"/> times per week |
| Peanuts/ peanut butter                              | <input type="checkbox"/> | <input type="checkbox"/> → | <input type="text"/> <input type="text"/> times per week |
| Tree nuts/ tree nut butter<br>(i.e. almond, cashew) | <input type="checkbox"/> | <input type="checkbox"/> → | <input type="text"/> <input type="text"/> times per week |

PID:

|  |  |   |  |  |
|--|--|---|--|--|
|  |  | - |  |  |
|--|--|---|--|--|

Mother's Date of Birth:

|      |  |  |  |       |  |     |  |
|------|--|--|--|-------|--|-----|--|
|      |  |  |  |       |  |     |  |
| year |  |  |  | month |  | day |  |

**1 YEAR – PART 2**

---

4. Please indicate if your baby **currently** has any of the following feeding behaviours:

|                                           | No                       | Yes                      |                                         |
|-------------------------------------------|--------------------------|--------------------------|-----------------------------------------|
| Slow feeding                              | <input type="checkbox"/> | <input type="checkbox"/> |                                         |
| Taking only small quantities at each feed | <input type="checkbox"/> | <input type="checkbox"/> |                                         |
| Choking                                   | <input type="checkbox"/> | <input type="checkbox"/> |                                         |
| Hungry/ not satisfied                     | <input type="checkbox"/> | <input type="checkbox"/> |                                         |
| Refused to take breast milk               | <input type="checkbox"/> | <input type="checkbox"/> | <input type="checkbox"/> Not applicable |
| Refused to take other milk                | <input type="checkbox"/> | <input type="checkbox"/> | <input type="checkbox"/> Not applicable |
| Refused to take solids                    | <input type="checkbox"/> | <input type="checkbox"/> | <input type="checkbox"/> Not applicable |
| Can not establish feeding routine         | <input type="checkbox"/> | <input type="checkbox"/> |                                         |

5. Are you **currently** having difficulties feeding your baby?

- No, no difficulties
- Yes, some difficulties
- Yes, great difficulties

6. **During the past week**, how often did your baby usually spit-up (anything coming out of the mouth) during a 24-hour period?

- Less than once
- 1 to 3 times
- 4 to 6 times
- More than 6 times

7. **During the past week**, how much did your baby usually spit-up (anything coming out of the mouth) during a typical episode?

- Did not spit up
- Less than 1 tablespoonful
- 1 tablespoonful to 2 ounces
- More than 2 ounces to half the feeding
- More than half the feeding



**1 YEAR – PART 2**


---

8. ***During the past week***, how often did spitting up (anything coming out of the mouth) seem to be uncomfortable for your baby, for example, crying, fussing, irritability, etc?

- Never
- Rarely
- Sometimes
- Often
- Always

9. ***During the past week***, how often did your baby refuse a feeding even when hungry?

- Never
- Rarely
- Sometimes
- Often
- Always

10. ***During the past week***, how often did your baby stop eating soon after starting even when hungry?

- Never
- Rarely
- Sometimes
- Often
- Always

11. ***During the past week***, did your baby cry a lot during or within 1 hour after feedings?

- Never
- Rarely
- Sometimes
- Often
- Always

12. ***During the past week***, did your baby cry or fuss more than usual?

- Never
- Rarely
- Sometimes
- Often
- Always

PID:

|  |  |   |  |  |
|--|--|---|--|--|
|  |  | - |  |  |
|--|--|---|--|--|

Mother's Date of Birth:

|      |  |  |  |       |  |     |  |
|------|--|--|--|-------|--|-----|--|
|      |  |  |  |       |  |     |  |
| year |  |  |  | month |  | day |  |

**1 YEAR – PART 2**

---

13. **During the past week**, on average how long did your baby cry or fuss during a 24 hour period?

- Less than 10 minutes
- 10 minutes to 1 hour
- More than 1 hour but less than 3 hours
- 3 or more hours

14. **During the past week**, how often did your baby have hiccups?

- Never
- Rarely
- Sometimes
- Often
- Always

15. **During the past week**, how often did your baby have episodes of arching back?

- Never
- Rarely
- Sometimes
- Often
- Always

16. **During the past week**, has your baby stopped breathing while awake or struggled to breathe?

- No
- Yes

17. **During the past week**, has your baby turned blue or purple?

- No
- Yes

PID:

|  |  |   |  |  |  |
|--|--|---|--|--|--|
|  |  | - |  |  |  |
|--|--|---|--|--|--|

Mother's Date of Birth:

|  |  |  |  |
|--|--|--|--|
|  |  |  |  |
|--|--|--|--|

year

|  |  |
|--|--|
|  |  |
|--|--|

month

|  |  |
|--|--|
|  |  |
|--|--|

day

**1 YEAR – PART 2**

---

18. **In the last month**, have you noted your baby straining for 10 minutes or longer before successful passage of stool?

No

Yes

↳ if yes, how many times per week?

|  |  |
|--|--|
|  |  |
|--|--|

times

19. Does your baby typically have **at least one** bowel movement every day?

No

↳ if no, how many bowel movements does your baby have in a **typical week**?

|  |  |
|--|--|
|  |  |
|--|--|

bowel movements

Yes

↳ if yes, how many bowel movements does your baby have in a **typical day**?

|  |  |
|--|--|
|  |  |
|--|--|

bowel movements

20. **In the last month**, has your baby had any episodes of abdominal pain or discomfort?

No

Yes

**1 YEAR – PART 2**

21. *Since your last study visit or phone call*, has *your baby* had an infection that required antibiotic or antifungal (anti-yeast) treatment?

- No  
 Yes → if yes, please complete the following table:

**DRUG 1**

What was the type of infection?  Thrush  Ear infection  Chest infection  
 Urinary tract infection  Other: \_\_\_\_\_

What was the name of the drug? \_\_\_\_\_

How was it given?  Topical  Oral  Other: \_\_\_\_\_

What was the start date?     /   /    
 year month day

What was the end date?     /   /   or  Still currently in use  
 year month day

**DRUG 2**  Only one drug was given. (Do not complete the rest of the table)

What was the type of infection?  Thrush  Ear infection  Chest infection  
 Urinary tract infection  Other: \_\_\_\_\_

What was the name of the second drug? \_\_\_\_\_

How was it given?  Topical  Oral  Other: \_\_\_\_\_

What was the start date?     /   /    
 year month day

What was the end date?     /   /   or  Still currently in use  
 year month day

PID:

|  |  |   |  |  |
|--|--|---|--|--|
|  |  | - |  |  |
|--|--|---|--|--|

Mother's Date of Birth:

|  |  |  |  |
|--|--|--|--|
|  |  |  |  |
|--|--|--|--|

year

|  |  |
|--|--|
|  |  |
|--|--|

month

|  |  |
|--|--|
|  |  |
|--|--|

day

**1 YEAR – PART 2**

---

22. Please list any other medications, vitamins, homeopathics or supplements that ***your baby*** has taken ***since your last study visit or phone call.***

None

| <u>Medication, vitamin or supplement name</u> | <u>Currently in Use?</u> |                          |
|-----------------------------------------------|--------------------------|--------------------------|
|                                               | No                       | Yes                      |
| a. _____                                      | <input type="checkbox"/> | <input type="checkbox"/> |
| b. _____                                      | <input type="checkbox"/> | <input type="checkbox"/> |
| c. _____                                      | <input type="checkbox"/> | <input type="checkbox"/> |
| d. _____                                      | <input type="checkbox"/> | <input type="checkbox"/> |
| e. _____                                      | <input type="checkbox"/> | <input type="checkbox"/> |

23. ***Since your last study visit or phone call,*** has your baby needed to stay in the hospital?

- No
- Yes

PID:   -

Mother's Date of Birth:

year month day

**1 YEAR – PART 2**

24. *Since your last study visit or phone call*, have **you** taken any antibiotic or antifungal (anti-yeast) medications?

- No
- Yes → if yes, please complete the following table:

**DRUG 1**

What was the name of the drug? \_\_\_\_\_

How was it given?  Topical  Oral  Other: \_\_\_\_\_

What was the start date?     /   /    
 year month day

What was the end date?     /   /   or  Still currently in use

**DRUG 2**  Only one drug was taken. (Do not complete the rest of the table)

What was the name of the second drug? \_\_\_\_\_

How was it given?  Topical  Oral  Other: \_\_\_\_\_

What was the start date?     /   /    
 year month day

What was the end date?     /   /   or  Still currently in use

PID:   -

Mother's Date of Birth:          
 year month day

**1 YEAR – PART 2**

25. **If you are currently breastfeeding**, please list any other prescription medications that **you** have taken **since your last study visit or phone call**.

- Not currently breastfeeding
- None

| <u>Medication name</u> | <u>Currently in Use?</u> |                          |
|------------------------|--------------------------|--------------------------|
|                        | No                       | Yes                      |
| a. _____               | <input type="checkbox"/> | <input type="checkbox"/> |
| b. _____               | <input type="checkbox"/> | <input type="checkbox"/> |
| c. _____               | <input type="checkbox"/> | <input type="checkbox"/> |
| d. _____               | <input type="checkbox"/> | <input type="checkbox"/> |
| e. _____               | <input type="checkbox"/> | <input type="checkbox"/> |

26. How much time does your baby spend in sleep during the night (between 7 in the evening and 7 in the morning)?   hours,   minutes

27. How many times does your baby wake up during the night?  
  times

28. How much time during the night does your baby spend in wakefulness (from 10 in the evening to 6 in the morning)?   hours,   minutes

29. Do you consider your baby's sleep to be a problem?
- Not a problem at all
  - A small problem
  - A very serious problem

**1 YEAR – PART 2**


---

30. Has your baby been diagnosed with asthma or reactive airway disease by your doctor?

- Yes  
 No

31. Has your baby **ever** had wheezing?

- Yes  
 No

32. Has your baby **ever** had a problem with sneezing or a runny nose or a blocked nose when he/she **did not** have a cold or flu?

- Yes  
 No

33. Does your baby take any puffers or breathing medications?

- Yes  
 No

34. Have you been told by your doctor that your baby has "hay fever"?

- Yes  
 No

35. Have you been told by your doctor that your baby has eczema?

- Yes  
 No

36. **In the last month**, has your baby experienced any of the following?: (check all that apply)

- Itchy rashes  
 Itchy rashes that don't go away on the face, knuckles, elbows or knees  
 Rash on the nose, mouth or diaper area  
 Dry, thickened or scaly skin or more skin creases in the palms than usual  
 Cracked skin around the ear  
 Scaly scalp that won't go away  
 Red dots surrounding hair follicles  
 None of the above



PID:

|  |  |   |  |  |  |
|--|--|---|--|--|--|
|  |  | - |  |  |  |
|--|--|---|--|--|--|

Mother's Date of Birth:

|      |  |  |  |       |  |     |  |
|------|--|--|--|-------|--|-----|--|
|      |  |  |  |       |  |     |  |
| year |  |  |  | month |  | day |  |

**1 YEAR – PART 2**

---

37. Have you **ever** had any concerns that your baby may have an allergy?

No

Yes, I/we suspect(ed) an allergy

↳ if yes, please describe what the allergic substance was thought to be and what made you suspect and allergy:

---

---

---

Yes, an allergy was confirmed by the doctor

↳ if yes, please indicate what the allergic substance(s) is/are:

---

---

---

38. **Since your baby was born**, has he/she been regularly exposed to tobacco smoke? (regularly is defined as most days or nights)

No

Yes

PID:

|  |  |   |  |  |  |
|--|--|---|--|--|--|
|  |  | - |  |  |  |
|--|--|---|--|--|--|

Mother's Date of Birth:

|  |  |  |  |
|--|--|--|--|
|  |  |  |  |
|--|--|--|--|

year

|  |  |
|--|--|
|  |  |
|--|--|

month

|  |  |
|--|--|
|  |  |
|--|--|

day

**1 YEAR – PART 2**

---

39. Has your baby **ever** travelled outside of Canada or the United States?

No

Yes → if yes, please indicate the country, date and duration of stay of each trip:

| <u>Country</u> | <u>Date of arrival</u>                                                                                                                                                                                                                                                                                                                                                                                              | <u>Duration of visit</u> |  |  |  |  |  |  |  |       |
|----------------|---------------------------------------------------------------------------------------------------------------------------------------------------------------------------------------------------------------------------------------------------------------------------------------------------------------------------------------------------------------------------------------------------------------------|--------------------------|--|--|--|--|--|--|--|-------|
| a. _____       | <table border="1" style="display: inline-table; margin-right: 5px;"> <tr><td> </td><td> </td><td> </td><td> </td></tr> </table> / <table border="1" style="display: inline-table; margin-right: 5px;"> <tr><td> </td><td> </td></tr> </table> / <table border="1" style="display: inline-table;"> <tr><td> </td><td> </td></tr> </table><br><small>year                      month                      day</small> |                          |  |  |  |  |  |  |  | _____ |
|                |                                                                                                                                                                                                                                                                                                                                                                                                                     |                          |  |  |  |  |  |  |  |       |
|                |                                                                                                                                                                                                                                                                                                                                                                                                                     |                          |  |  |  |  |  |  |  |       |
|                |                                                                                                                                                                                                                                                                                                                                                                                                                     |                          |  |  |  |  |  |  |  |       |
| b. _____       | <table border="1" style="display: inline-table; margin-right: 5px;"> <tr><td> </td><td> </td><td> </td><td> </td></tr> </table> / <table border="1" style="display: inline-table; margin-right: 5px;"> <tr><td> </td><td> </td></tr> </table> / <table border="1" style="display: inline-table;"> <tr><td> </td><td> </td></tr> </table>                                                                            |                          |  |  |  |  |  |  |  | _____ |
|                |                                                                                                                                                                                                                                                                                                                                                                                                                     |                          |  |  |  |  |  |  |  |       |
|                |                                                                                                                                                                                                                                                                                                                                                                                                                     |                          |  |  |  |  |  |  |  |       |
|                |                                                                                                                                                                                                                                                                                                                                                                                                                     |                          |  |  |  |  |  |  |  |       |
| c. _____       | <table border="1" style="display: inline-table; margin-right: 5px;"> <tr><td> </td><td> </td><td> </td><td> </td></tr> </table> / <table border="1" style="display: inline-table; margin-right: 5px;"> <tr><td> </td><td> </td></tr> </table> / <table border="1" style="display: inline-table;"> <tr><td> </td><td> </td></tr> </table>                                                                            |                          |  |  |  |  |  |  |  | _____ |
|                |                                                                                                                                                                                                                                                                                                                                                                                                                     |                          |  |  |  |  |  |  |  |       |
|                |                                                                                                                                                                                                                                                                                                                                                                                                                     |                          |  |  |  |  |  |  |  |       |
|                |                                                                                                                                                                                                                                                                                                                                                                                                                     |                          |  |  |  |  |  |  |  |       |
| d. _____       | <table border="1" style="display: inline-table; margin-right: 5px;"> <tr><td> </td><td> </td><td> </td><td> </td></tr> </table> / <table border="1" style="display: inline-table; margin-right: 5px;"> <tr><td> </td><td> </td></tr> </table> / <table border="1" style="display: inline-table;"> <tr><td> </td><td> </td></tr> </table>                                                                            |                          |  |  |  |  |  |  |  | _____ |
|                |                                                                                                                                                                                                                                                                                                                                                                                                                     |                          |  |  |  |  |  |  |  |       |
|                |                                                                                                                                                                                                                                                                                                                                                                                                                     |                          |  |  |  |  |  |  |  |       |
|                |                                                                                                                                                                                                                                                                                                                                                                                                                     |                          |  |  |  |  |  |  |  |       |
| e. _____       | <table border="1" style="display: inline-table; margin-right: 5px;"> <tr><td> </td><td> </td><td> </td><td> </td></tr> </table> / <table border="1" style="display: inline-table; margin-right: 5px;"> <tr><td> </td><td> </td></tr> </table> / <table border="1" style="display: inline-table;"> <tr><td> </td><td> </td></tr> </table>                                                                            |                          |  |  |  |  |  |  |  | _____ |
|                |                                                                                                                                                                                                                                                                                                                                                                                                                     |                          |  |  |  |  |  |  |  |       |
|                |                                                                                                                                                                                                                                                                                                                                                                                                                     |                          |  |  |  |  |  |  |  |       |
|                |                                                                                                                                                                                                                                                                                                                                                                                                                     |                          |  |  |  |  |  |  |  |       |

40. What type of water does your child drink most often?

Well water

Bottled water

Municipal water

Municipal water with home filtration system

PID:

|  |  |   |  |  |  |
|--|--|---|--|--|--|
|  |  | - |  |  |  |
|--|--|---|--|--|--|

Mother's Date of Birth:

|  |  |  |  |
|--|--|--|--|
|  |  |  |  |
|--|--|--|--|

year

|  |  |
|--|--|
|  |  |
|--|--|

month

|  |  |
|--|--|
|  |  |
|--|--|

day

**1 YEAR – PART 2**

---

41. Does your child attend daycare or preschool?

No

↳ if no, who cares for your child? (check all that apply)

Parent

Grandparent / other extended family member

Nanny / babysitter

Yes

↳ if yes, how old was your child when they first attended?

|  |  |   |  |
|--|--|---|--|
|  |  | . |  |
|--|--|---|--|

months

↳ if yes, please indicate the type of care:

Home daycare

Centre-based daycare

Preschool

↳ if yes, please indicate the frequency of attendance:

Part-time

Full-time

**1.5 YEARS**

**Instructions:**

- This form is to be completed by research personnel through telephone contact with participants when their child 1.5 years old.
- Please refer to previous forms to appropriately prompt and ensure consistency for questions 3, 5, 6, 8, 9 and 14-21.

1. Was the follow up contact completed?

- No  
 Yes

2. Date:     /   /    
 year month day

3. Have you **ever** breast fed your child?

- No  
 Yes

↳ if yes, **do you still** breastfeed your child?

- No

↳ if no, how old was your child when you stopped breast feeding?

.  months

(fill in "0" if your child was less than 1 month old)

- Yes

4. Does your child eat a special diet?

- No  
 Yes

↳ if yes, check all that apply:

- Vegetarian
- Vegan
- Gluten free
- Dairy free
- Other:

\_\_\_\_\_

PID:   -

Mother's Date of Birth:

year month day

**1.5 YEARS**

5. *Since your last study visit or phone call*, has *your child* had an infection that required antibiotic or antifungal (anti-yeast) treatment?

- No  
 Yes → if yes, please complete the following table:

**DRUG 1**

What was the type of infection?  Thrush  Ear infection  Chest infection  
 Urinary tract infection  Other: \_\_\_\_\_

What was the name of the drug? \_\_\_\_\_

How was it given?  Topical  Oral  Other: \_\_\_\_\_

What was the start date?     /   /    
 year month day

What was the end date?     /   /   or  Still currently in use

**DRUG 2**  N/A (Do not complete the rest of the table)

What was the type of infection?  Thrush  Ear infection  Chest infection  
 Urinary tract infection  Other: \_\_\_\_\_

What was the name of the second drug? \_\_\_\_\_

How was it given?  Topical  Oral  Other: \_\_\_\_\_

What was the start date?     /   /    
 year month day

What was the end date?     /   /   or  Still currently in use

PID:

|  |  |   |  |  |
|--|--|---|--|--|
|  |  | - |  |  |
|--|--|---|--|--|

Mother's Date of Birth:

|  |  |  |  |
|--|--|--|--|
|  |  |  |  |
|--|--|--|--|

year

|  |  |
|--|--|
|  |  |
|--|--|

month

|  |  |
|--|--|
|  |  |
|--|--|

day

**1.5 YEARS**

---

6. Please list any other medications, vitamins, homeopathics or supplements that ***your child*** has taken ***since your last study visit or phone call.***

None

| <u>Medication, vitamin or supplement name</u> | <u>Currently in Use?</u> |                          |
|-----------------------------------------------|--------------------------|--------------------------|
|                                               | No                       | Yes                      |
| a. _____                                      | <input type="checkbox"/> | <input type="checkbox"/> |
| b. _____                                      | <input type="checkbox"/> | <input type="checkbox"/> |
| c. _____                                      | <input type="checkbox"/> | <input type="checkbox"/> |
| d. _____                                      | <input type="checkbox"/> | <input type="checkbox"/> |
| e. _____                                      | <input type="checkbox"/> | <input type="checkbox"/> |
| f. _____                                      | <input type="checkbox"/> | <input type="checkbox"/> |
| g. _____                                      | <input type="checkbox"/> | <input type="checkbox"/> |

7. ***Since your last study visit or phone call,*** has your child needed to stay in the hospital?

- No
- Yes

PID:   -

Mother's Date of Birth:

year month day

**1.5 YEARS**

8. **If you are currently breastfeeding**, have **you** taken any antibiotic or antifungal (anti-yeast) medications **since your last study visit or phone call**?

- Not currently breastfeeding
- No
- Yes → if yes, please complete the following table:

**DRUG 1**

What was the name of the drug? \_\_\_\_\_

How was it given?  Topical  Oral  Other: \_\_\_\_\_

What was the start date?     /   /    
 year month day

What was the end date?     /   /   or  Still currently in use  
 year month day

**DRUG 2**  Only one drug was taken. (Do not complete the rest of the table)

What was the name of the second drug? \_\_\_\_\_

How was it given?  Topical  Oral  Other: \_\_\_\_\_

What was the start date?     /   /    
 year month day

What was the end date?     /   /   or  Still currently in use  
 year month day

**1.5 YEARS**

9. **If you are currently breastfeeding**, please list any other prescription medications that **you** have taken **since your last study visit or phone call**.

- Not currently breastfeeding
- None

| <u>Medication name</u> | <u>Currently in Use?</u> |                          |
|------------------------|--------------------------|--------------------------|
|                        | <b>No</b>                | <b>Yes</b>               |
| a. _____               | <input type="checkbox"/> | <input type="checkbox"/> |
| b. _____               | <input type="checkbox"/> | <input type="checkbox"/> |
| c. _____               | <input type="checkbox"/> | <input type="checkbox"/> |
| d. _____               | <input type="checkbox"/> | <input type="checkbox"/> |
| e. _____               | <input type="checkbox"/> | <input type="checkbox"/> |
| f. _____               | <input type="checkbox"/> | <input type="checkbox"/> |
| g. _____               | <input type="checkbox"/> | <input type="checkbox"/> |

10. How much time does your child spend in sleep during the night (between 7 in the evening and 7 in the morning)?

hours,   minutes

11. How many times does your child wake up during the night?

times

12. How much time during the night does your child spend in wakefulness (from 10 in the evening to 6 in the morning)?

hours,   minutes

13. Do you consider your child's sleep to be a problem?

- Not a problem at all
- A small problem
- A very serious problem



PID:

|  |  |   |  |  |  |
|--|--|---|--|--|--|
|  |  | - |  |  |  |
|--|--|---|--|--|--|

Mother's Date of Birth:

|  |  |  |  |
|--|--|--|--|
|  |  |  |  |
|--|--|--|--|

year

|  |  |
|--|--|
|  |  |
|--|--|

month

|  |  |
|--|--|
|  |  |
|--|--|

day

**1.5 YEARS**

---

14. Has your child been diagnosed with asthma or reactive airway disease by your doctor?

- Yes
- No

15. Has your child **ever** had wheezing?

- Yes
- No

16. Has your child **ever** had a problem with sneezing or a runny nose or a blocked nose when he/she **did not** have a cold or flu?

- Yes
- No

17. Does your child take any puffers or breathing medications?

- Yes
- No

18. Have you been told by your doctor that your child has "hay fever"?

- Yes
- No

19. Have you been told by your doctor that your child has eczema?

- Yes
- No

20. Has your child **ever** had an itchy rash which was coming and going for at least 6 months?

- No
- Yes

↳ if yes, has this itchy rash at any time affected any of the following places: the folds of the elbows, behind the knees, in front of the ankles, under the buttocks, or around the neck ears or eyes?

- Yes
- No

21. Have you **ever** been told by your doctor that your child has an allergy?

- No
- Yes

↳ if yes, please specify the allergic substance(s) :

---



---

**2 YEARS – PART 1**

**Instructions:**

- This form is to be completed by research personnel at the 2 year study visit.
- Record the measurements indicated below and attach this form to "Part 2" completed by the participant.

1. Date and time of visit:     /   /   :    
 year month day 24 hour clock

2. Head circumference:   .  cm

3. Tricep skinfold thickness:

Measurement 1:   .  cm

Measurement 2:   .  cm

Measurement 3:   .  cm

4. Subscapular skinfold thickness:

Measurement 1:   .  cm

Measurement 2:   .  cm

Measurement 3:   .  cm

5. Bicep skinfold thickness:

Measurement 1:   .  cm

Measurement 2:   .  cm

Measurement 3:   .  cm

|  |  |   |  |  |  |
|--|--|---|--|--|--|
|  |  | - |  |  |  |
|--|--|---|--|--|--|

|      |  |  |  |       |  |     |  |  |
|------|--|--|--|-------|--|-----|--|--|
|      |  |  |  |       |  |     |  |  |
| year |  |  |  | month |  | day |  |  |

**2 YEARS – PART 1**

---

6. Mid-arm circumference:

Measurement 1: 

|  |  |
|--|--|
|  |  |
|--|--|

 . 

|  |
|--|
|  |
|--|

 cm

Measurement 2: 

|  |  |
|--|--|
|  |  |
|--|--|

 . 

|  |
|--|
|  |
|--|

 cm

Measurement 3: 

|  |  |
|--|--|
|  |  |
|--|--|

 . 

|  |
|--|
|  |
|--|

 cm

7. Suprailiac skinfold thickness:

Measurement 1: 

|  |  |
|--|--|
|  |  |
|--|--|

 . 

|  |
|--|
|  |
|--|

 cm

Measurement 2: 

|  |  |
|--|--|
|  |  |
|--|--|

 . 

|  |
|--|
|  |
|--|

 cm

Measurement 3: 

|  |  |
|--|--|
|  |  |
|--|--|

 . 

|  |
|--|
|  |
|--|

 cm

8. Hip circumference:

Measurement 1: 

|  |  |
|--|--|
|  |  |
|--|--|

 . 

|  |
|--|
|  |
|--|

 cm

Measurement 2: 

|  |  |
|--|--|
|  |  |
|--|--|

 . 

|  |
|--|
|  |
|--|

 cm

Measurement 3: 

|  |  |
|--|--|
|  |  |
|--|--|

 . 

|  |
|--|
|  |
|--|

 cm

9. Abdominal circumference:

Measurement 1: 

|  |  |
|--|--|
|  |  |
|--|--|

 . 

|  |
|--|
|  |
|--|

 cm

Measurement 2: 

|  |  |
|--|--|
|  |  |
|--|--|

 . 

|  |
|--|
|  |
|--|

 cm

Measurement 3: 

|  |  |
|--|--|
|  |  |
|--|--|

 . 

|  |
|--|
|  |
|--|

 cm

10. Length: 

|  |  |  |
|--|--|--|
|  |  |  |
|--|--|--|

 . 

|  |
|--|
|  |
|--|

 cm

11. Body mass: 

|  |  |
|--|--|
|  |  |
|--|--|

 . 

|  |
|--|
|  |
|--|

 kg

PID:

|  |  |   |  |  |
|--|--|---|--|--|
|  |  | - |  |  |
|--|--|---|--|--|

Mother's Date of Birth:

|      |  |  |  |       |  |     |  |
|------|--|--|--|-------|--|-----|--|
|      |  |  |  |       |  |     |  |
| year |  |  |  | month |  | day |  |

**2 YEARS – PART 1**

---

12. Were stool samples received?

No

Yes

↳ if yes, indicate the following:

Date Collected

|                 |      |  |  |  |   |       |  |   |     |  |
|-----------------|------|--|--|--|---|-------|--|---|-----|--|
| <b>Day 3</b>    |      |  |  |  | / |       |  | / |     |  |
|                 | year |  |  |  |   | month |  |   | day |  |
| <b>Day 10</b>   |      |  |  |  | / |       |  | / |     |  |
| <b>6 Weeks</b>  |      |  |  |  | / |       |  | / |     |  |
| <b>12 Weeks</b> |      |  |  |  | / |       |  | / |     |  |
| <b>5 Months</b> |      |  |  |  | / |       |  | / |     |  |
| <b>1 Year</b>   |      |  |  |  | / |       |  | / |     |  |
| <b>2 Year</b>   |      |  |  |  | / |       |  | / |     |  |

PID:

|  |  |   |  |  |  |
|--|--|---|--|--|--|
|  |  | - |  |  |  |
|--|--|---|--|--|--|

Mother's Date of Birth:

|      |  |  |  |       |  |     |  |  |
|------|--|--|--|-------|--|-----|--|--|
|      |  |  |  |       |  |     |  |  |
| year |  |  |  | month |  | day |  |  |

**2 YEARS – PART 2**

**Instructions:**

- Mark only one box with an "X" for each question, unless instructed to do otherwise.
- Please use your study diary to help you remember the information asked for.
- All of your answers will remain confidential.
- If you do not understand a question, please ask a research staff member.

1. Have you **ever** breast fed your child?

No

Yes

↳ if yes, **do you still** breastfeed your child?

No

↳ if no, how old was your child when you stopped breast feeding?

|  |  |   |  |        |
|--|--|---|--|--------|
|  |  | . |  | months |
|--|--|---|--|--------|

(fill in "0" if your child was less than 1 month old)

Yes

2. Does your child eat a special diet?

No

Yes

↳ if yes, check all that apply:

Vegetarian

Vegan

Gluten free

Dairy free

Other:

\_\_\_\_\_

PID:

|  |  |   |  |  |  |
|--|--|---|--|--|--|
|  |  | - |  |  |  |
|--|--|---|--|--|--|

Mother's Date of Birth:

|  |  |  |  |
|--|--|--|--|
|  |  |  |  |
|--|--|--|--|

year

|  |  |
|--|--|
|  |  |
|--|--|

month

|  |  |
|--|--|
|  |  |
|--|--|

day

**2 YEARS – PART 2**

---

3. Are you **currently** having difficulties feeding your child?

- No, no difficulties
- Yes, some difficulties
- Yes, great difficulties

4. Does your child typically have **at least one** bowel movement every day?

- No  
 ↳ if no, how many bowel movements does your child have in a **typical week**?

|  |  |
|--|--|
|  |  |
|--|--|

bowel movements

- Yes  
 ↳ if yes, how many bowel movements does your child have in a **typical day**?

|  |  |
|--|--|
|  |  |
|--|--|

bowel movements

5. **In the last month**, has your child had any episodes of abdominal pain or discomfort?

- No
- Yes

**2 YEARS – PART 2**

6. *Since your last study visit or phone call*, has *your child* had an infection that required antibiotic or antifungal (anti-yeast) treatment?

- No  
 Yes → if yes, please complete the following table:

**DRUG 1**

What was the type of infection?  Thrush  Ear infection  Chest infection  
 Urinary tract infection  Other: \_\_\_\_\_

What was the name of the drug? \_\_\_\_\_

How was it given?  Topical  Oral  Other: \_\_\_\_\_

What was the start date?     /   /    
 year month day

What was the end date?     /   /   or  Still currently in use

**DRUG 2**  N/A (Do not complete the rest of the table)

What was the type of infection?  Thrush  Ear infection  Chest infection  
 Urinary tract infection  Other: \_\_\_\_\_

What was the name of the second drug? \_\_\_\_\_

How was it given?  Topical  Oral  Other: \_\_\_\_\_

What was the start date?     /   /    
 year month day

What was the end date?     /   /   or  Still currently in use

PID:

|  |  |   |  |  |  |
|--|--|---|--|--|--|
|  |  | - |  |  |  |
|--|--|---|--|--|--|

Mother's Date of Birth:

|      |  |  |  |       |  |     |
|------|--|--|--|-------|--|-----|
|      |  |  |  |       |  |     |
| year |  |  |  | month |  | day |

**2 YEARS – PART 2**

---

7. Please list any other medications, vitamins, homeopathics or supplements that ***your child*** has taken ***since your last study visit or phone call.***

None

| <u>Medication, vitamin or supplement name</u> | <u>Currently in Use?</u> |                          |
|-----------------------------------------------|--------------------------|--------------------------|
|                                               | <b>No</b>                | <b>Yes</b>               |
| a. _____                                      | <input type="checkbox"/> | <input type="checkbox"/> |
| b. _____                                      | <input type="checkbox"/> | <input type="checkbox"/> |
| c. _____                                      | <input type="checkbox"/> | <input type="checkbox"/> |
| d. _____                                      | <input type="checkbox"/> | <input type="checkbox"/> |
| e. _____                                      | <input type="checkbox"/> | <input type="checkbox"/> |
| f. _____                                      | <input type="checkbox"/> | <input type="checkbox"/> |
| g. _____                                      | <input type="checkbox"/> | <input type="checkbox"/> |

8. ***Since your last study visit or phone call,*** has your child needed to stay in the hospital?

- No
- Yes



PID:   -

Mother's Date of Birth:

year month day

**2 YEARS – PART 2**

9. **If you are currently breastfeeding**, have **you** taken any antibiotic or antifungal (anti-yeast) medications **since your last study visit or phone call?**

- Not currently breastfeeding
- No
- Yes → if yes, please complete the following table:

**DRUG 1**

What was the name of the drug? \_\_\_\_\_

How was it given?  Topical  Oral  Other: \_\_\_\_\_

What was the start date?     /   /    
 year month day

What was the end date?     /   /   or  Still currently in use  
 year month day

**DRUG 2**  Only one drug was taken. (Do not complete the rest of the table)

What was the name of the second drug? \_\_\_\_\_

How was it given?  Topical  Oral  Other: \_\_\_\_\_

What was the start date?     /   /    
 year month day

What was the end date?     /   /   or  Still currently in use  
 year month day

**2 YEARS – PART 2**

10. **If you are currently breastfeeding**, please list any other prescription medications that **you** have taken **since your last study visit or phone call**.

- Not currently breastfeeding
- None

| <u>Medication name</u> | <u>Currently in Use?</u> |                          |
|------------------------|--------------------------|--------------------------|
|                        | <b>No</b>                | <b>Yes</b>               |
| a. _____               | <input type="checkbox"/> | <input type="checkbox"/> |
| b. _____               | <input type="checkbox"/> | <input type="checkbox"/> |
| c. _____               | <input type="checkbox"/> | <input type="checkbox"/> |
| d. _____               | <input type="checkbox"/> | <input type="checkbox"/> |
| e. _____               | <input type="checkbox"/> | <input type="checkbox"/> |
| f. _____               | <input type="checkbox"/> | <input type="checkbox"/> |
| g. _____               | <input type="checkbox"/> | <input type="checkbox"/> |

11. How much time does your child spend in sleep during the night (between 7 in the evening and 7 in the morning)?

hours,   minutes

12. How many times does your child wake up during the night?

times

13. How much time during the night does your child spend in wakefulness (from 10 in the evening to 6 in the morning)?

hours,   minutes

14. Do you consider your child's sleep to be a problem?

- Not a problem at all
- A small problem
- A very serious problem

PID:

|  |  |   |  |  |
|--|--|---|--|--|
|  |  | - |  |  |
|--|--|---|--|--|

Mother's Date of Birth:

|      |  |  |  |       |  |     |  |
|------|--|--|--|-------|--|-----|--|
|      |  |  |  |       |  |     |  |
| year |  |  |  | month |  | day |  |

**2 YEARS – PART 2**

---

15. Has your child been diagnosed with asthma or reactive airway disease by your doctor?

- Yes
- No

16. Has your child **ever** had wheezing?

- Yes
- No

17. Has your child **ever** had a problem with sneezing or a runny nose or a blocked nose when he/she **did not** have a cold or flu?

- Yes
- No

18. Does your child take any puffers or breathing medications?

- Yes
- No

19. Have you been told by your doctor that your child has "hay fever"?

- Yes
- No

20. Have you been told by your doctor that your child has eczema?

- Yes
- No

21. Has your child **ever** had an itchy rash which was coming and going for at least 6 months?

- No
- Yes

↳ if yes, has this itchy rash at any time affected any of the following places: the folds of the elbows, behind the knees, in front of the ankles, under the buttocks, or around the neck ears or eyes?

- Yes
- No

**2 YEARS – PART 2**

22. Have you **ever** been told by your doctor that your child has an allergy?

- No
- Yes

↳ if yes, please specify the allergic substance(s) :

\_\_\_\_\_

\_\_\_\_\_

23. **In the last year**, has your child been regularly exposed to tobacco smoke? (regularly is defined as most days or nights)

- No
- Yes

24. **In the last year**, has your child travelled outside of Canada or the United States?

- No
- Yes → if yes, please indicate the country, date and duration of stay of each trip:

| <u>Country</u> | <u>Date of arrival</u>                                                                                                                                                                        | <u>Duration of visit</u> |
|----------------|-----------------------------------------------------------------------------------------------------------------------------------------------------------------------------------------------|--------------------------|
| a. _____       | <input type="text"/> <input type="text"/> <input type="text"/> <input type="text"/> / <input type="text"/> <input type="text"/> / <input type="text"/> <input type="text"/><br>year month day | _____                    |
| b. _____       | <input type="text"/> <input type="text"/> <input type="text"/> <input type="text"/> / <input type="text"/> <input type="text"/> / <input type="text"/> <input type="text"/>                   | _____                    |
| c. _____       | <input type="text"/> <input type="text"/> <input type="text"/> <input type="text"/> / <input type="text"/> <input type="text"/> / <input type="text"/> <input type="text"/>                   | _____                    |
| d. _____       | <input type="text"/> <input type="text"/> <input type="text"/> <input type="text"/> / <input type="text"/> <input type="text"/> / <input type="text"/> <input type="text"/>                   | _____                    |
| e. _____       | <input type="text"/> <input type="text"/> <input type="text"/> <input type="text"/> / <input type="text"/> <input type="text"/> / <input type="text"/> <input type="text"/>                   | _____                    |

25. What type of water does your child drink most often?

- Well water
- Bottled water
- Municipal water
- Municipal water with home filtration system

PID:

|  |  |   |  |  |  |
|--|--|---|--|--|--|
|  |  | - |  |  |  |
|--|--|---|--|--|--|

Mother's Date of Birth:

|      |  |  |  |       |  |     |  |
|------|--|--|--|-------|--|-----|--|
|      |  |  |  |       |  |     |  |
| year |  |  |  | month |  | day |  |

**2 YEARS – PART 2**

---

26. Does your child attend daycare or preschool?

No

↳ if no, who cares for your child? (check all that apply)

- Parent
- Grandparent / other extended family member
- Nanny / babysitter

Yes

↳ if yes, how old was your child when they first attended?

|  |  |   |  |        |
|--|--|---|--|--------|
|  |  | . |  | months |
|--|--|---|--|--------|

↳ if yes, please indicate the type of care:

- Home daycare
- Centre-based daycare
- Preschool

↳ if yes, please indicate the frequency of attendance:

- Part-time
- Full-time

**2.5 YEARS**

**Instructions:**

- This form is to be completed by research personnel through telephone contact with participants when their child 2.5 years old.
- Please refer to previous forms to appropriately prompt and ensure consistency for questions 3, 5, 6, 8, 9 and 14-21.

1. Was the follow up contact completed?

- No  
 Yes

2. Date:

/   /    
 year month day

3. Have you **ever** breast fed your child?

- No  
 Yes

↳ if yes, **do you still** breastfeed your child?

- No

↳ if no, how old was your child when you stopped breast feeding?

.  months

(fill in "0" if your child was less than 1 month old)

- Yes

4. Does your child eat a special diet?

- No  
 Yes

↳ if yes, check all that apply:

- Vegetarian
- Vegan
- Gluten free
- Dairy free
- Other:

\_\_\_\_\_

PID:   -

Mother's Date of Birth:

year month day

**2.5 YEARS**

5. *Since your last study visit or phone call*, has *your child* had an infection that required antibiotic or antifungal (anti-yeast) treatment?

- No
- Yes → if yes, please complete the following table:

**DRUG 1**

What was the type of infection?  Thrush  Ear infection  Chest infection  
 Urinary tract infection  Other: \_\_\_\_\_

What was the name of the drug? \_\_\_\_\_

How was it given?  Topical  Oral  Other: \_\_\_\_\_

What was the start date?     /   /    
 year month day

What was the end date?     /   /   or  Still currently in use

**DRUG 2**  N/A (Do not complete the rest of the table)

What was the type of infection?  Thrush  Ear infection  Chest infection  
 Urinary tract infection  Other: \_\_\_\_\_

What was the name of the second drug? \_\_\_\_\_

How was it given?  Topical  Oral  Other: \_\_\_\_\_

What was the start date?     /   /    
 year month day

What was the end date?     /   /   or  Still currently in use

PID:

|  |  |   |  |  |  |
|--|--|---|--|--|--|
|  |  | - |  |  |  |
|--|--|---|--|--|--|

Mother's Date of Birth:

|      |  |  |  |       |  |     |  |
|------|--|--|--|-------|--|-----|--|
|      |  |  |  |       |  |     |  |
| year |  |  |  | month |  | day |  |

**2.5 YEARS**

---

6. Please list any other medications, vitamins, homeopathics or supplements that ***your child*** has taken ***since your last study visit or phone call.***

None

| <u>Medication, vitamin or supplement name</u> | <u>Currently in Use?</u> |                          |
|-----------------------------------------------|--------------------------|--------------------------|
|                                               | No                       | Yes                      |
| a. _____                                      | <input type="checkbox"/> | <input type="checkbox"/> |
| b. _____                                      | <input type="checkbox"/> | <input type="checkbox"/> |
| c. _____                                      | <input type="checkbox"/> | <input type="checkbox"/> |
| d. _____                                      | <input type="checkbox"/> | <input type="checkbox"/> |
| e. _____                                      | <input type="checkbox"/> | <input type="checkbox"/> |
| f. _____                                      | <input type="checkbox"/> | <input type="checkbox"/> |
| g. _____                                      | <input type="checkbox"/> | <input type="checkbox"/> |

7. ***Since your last study visit or phone call,*** has your child needed to stay in the hospital?

- No
- Yes



PID:   -

Mother's Date of Birth:

/   /

year month day

**2.5 YEARS**

8. **If you are currently breastfeeding**, have **you** taken any antibiotic or antifungal (anti-yeast) medications **since your last study visit or phone call**?

- Not currently breastfeeding
- No
- Yes → if yes, please complete the following table:

**DRUG 1**

What was the name of the drug? \_\_\_\_\_

How was it given?  Topical  Oral  Other: \_\_\_\_\_

What was the start date?     /   /

year month day

What was the end date?     /   /   or  Still currently in use

year month day

**DRUG 2**  Only one drug was taken. (Do not complete the rest of the table)

What was the name of the second drug? \_\_\_\_\_

How was it given?  Topical  Oral  Other: \_\_\_\_\_

What was the start date?     /   /

year month day

What was the end date?     /   /   or  Still currently in use

year month day

**2.5 YEARS**

9. **If you are currently breastfeeding**, please list any other prescription medications that **you** have taken **since your last study visit or phone call**.

- Not currently breastfeeding
- None

| <u>Medication name</u> | <u>Currently in Use?</u> |                          |
|------------------------|--------------------------|--------------------------|
|                        | <b>No</b>                | <b>Yes</b>               |
| a. _____               | <input type="checkbox"/> | <input type="checkbox"/> |
| b. _____               | <input type="checkbox"/> | <input type="checkbox"/> |
| c. _____               | <input type="checkbox"/> | <input type="checkbox"/> |
| d. _____               | <input type="checkbox"/> | <input type="checkbox"/> |
| e. _____               | <input type="checkbox"/> | <input type="checkbox"/> |
| f. _____               | <input type="checkbox"/> | <input type="checkbox"/> |
| g. _____               | <input type="checkbox"/> | <input type="checkbox"/> |

10. How much time does your child spend in sleep during the night (between 7 in the evening and 7 in the morning)?

hours,   minutes

11. How many times does your child wake up during the night?

times

12. How much time during the night does your child spend in wakefulness (from 10 in the evening to 6 in the morning)?

hours,   minutes

13. Do you consider your child's sleep to be a problem?

- Not a problem at all
- A small problem
- A very serious problem

PID:

|  |  |   |  |  |  |
|--|--|---|--|--|--|
|  |  | - |  |  |  |
|--|--|---|--|--|--|

Mother's Date of Birth:

|      |  |  |  |       |  |     |  |
|------|--|--|--|-------|--|-----|--|
|      |  |  |  |       |  |     |  |
| year |  |  |  | month |  | day |  |

**2.5 YEARS**

---

14. Has your child been diagnosed with asthma or reactive airway disease by your doctor?

- Yes
- No

15. Has your child **ever** had wheezing?

- Yes
- No

16. Has your child **ever** had a problem with sneezing or a runny nose or a blocked nose when he/she **did not** have a cold or flu?

- Yes
- No

17. Does your child take any puffers or breathing medications?

- Yes
- No

18. Have you been told by your doctor that your child has "hay fever"?

- Yes
- No

19. Have you been told by your doctor that your child has eczema?

- Yes
- No

20. Has your child **ever** had an itchy rash which was coming and going for at least 6 months?

- No
- Yes

↳ if yes, has this itchy rash at any time affected any of the following places: the folds of the elbows, behind the knees, in front of the ankles, under the buttocks, or around the neck ears or eyes?

- Yes
- No

21. Have you **ever** been told by your doctor that your child has an allergy?

- No
- Yes

↳ if yes, please specify the allergic substance(s) :

---



---

|  |  |   |  |  |  |
|--|--|---|--|--|--|
|  |  | - |  |  |  |
|--|--|---|--|--|--|

|      |  |  |  |       |  |     |  |
|------|--|--|--|-------|--|-----|--|
|      |  |  |  |       |  |     |  |
| year |  |  |  | month |  | day |  |

**3 YEARS – PART 1**

**Instructions:**

- This form is to be completed by research personnel at the 3 year study visit.
- Record the measurements indicated below and attach this form to "Part 2" completed by the participant.

1. Date and time of visit: 

|  |  |  |  |
|--|--|--|--|
|  |  |  |  |
|--|--|--|--|

 / 

|  |  |
|--|--|
|  |  |
|--|--|

 / 

|  |  |
|--|--|
|  |  |
|--|--|

 : 

|  |  |
|--|--|
|  |  |
|--|--|

 : 

|  |  |
|--|--|
|  |  |
|--|--|

  
year month day 24 hour clock

2. Head circumference: 

|  |  |
|--|--|
|  |  |
|--|--|

 . 

|  |
|--|
|  |
|--|

 cm

3. Tricep skinfold thickness:

Measurement 1: 

|  |  |
|--|--|
|  |  |
|--|--|

 . 

|  |
|--|
|  |
|--|

 cm

Measurement 2: 

|  |  |
|--|--|
|  |  |
|--|--|

 . 

|  |
|--|
|  |
|--|

 cm

Measurement 3: 

|  |  |
|--|--|
|  |  |
|--|--|

 . 

|  |
|--|
|  |
|--|

 cm

4. Subscapular skinfold thickness:

Measurement 1: 

|  |  |
|--|--|
|  |  |
|--|--|

 . 

|  |
|--|
|  |
|--|

 cm

Measurement 2: 

|  |  |
|--|--|
|  |  |
|--|--|

 . 

|  |
|--|
|  |
|--|

 cm

Measurement 3: 

|  |  |
|--|--|
|  |  |
|--|--|

 . 

|  |
|--|
|  |
|--|

 cm

5. Bicep skinfold thickness:

Measurement 1: 

|  |  |
|--|--|
|  |  |
|--|--|

 . 

|  |
|--|
|  |
|--|

 cm

Measurement 2: 

|  |  |
|--|--|
|  |  |
|--|--|

 . 

|  |
|--|
|  |
|--|

 cm

Measurement 3: 

|  |  |
|--|--|
|  |  |
|--|--|

 . 

|  |
|--|
|  |
|--|

 cm

|  |  |   |  |  |  |
|--|--|---|--|--|--|
|  |  | - |  |  |  |
|--|--|---|--|--|--|

|      |  |  |  |       |  |     |  |
|------|--|--|--|-------|--|-----|--|
|      |  |  |  |       |  |     |  |
| year |  |  |  | month |  | day |  |

**3 YEARS – PART 1**

---

6. Mid-arm circumference:

Measurement 1:   .  cm

Measurement 2:   .  cm

Measurement 3:   .  cm

7. Suprailiac skinfold thickness:

Measurement 1:   .  cm

Measurement 2:   .  cm

Measurement 3:   .  cm

8. Hip circumference:

Measurement 1:   .  cm

Measurement 2:   .  cm

Measurement 3:   .  cm

9. Abdominal circumference:

Measurement 1:   .  cm

Measurement 2:   .  cm

Measurement 3:   .  cm

10. Length:    .  cm

11. Body mass:   .  kg

PID:

|  |  |   |  |  |
|--|--|---|--|--|
|  |  | - |  |  |
|--|--|---|--|--|

Mother's Date of Birth:

|      |  |  |  |       |  |     |  |
|------|--|--|--|-------|--|-----|--|
|      |  |  |  |       |  |     |  |
| year |  |  |  | month |  | day |  |

**3 YEARS – PART 1**

---

12. Were stool samples received?

- No
- Yes

↳ if yes, indicate the following:

Date Collected

|                 |                                                                                                                                                                                                                                                                                                                                                                                                                                                                                                                                                                                                                                                                                                                                             |  |  |  |  |  |  |  |  |
|-----------------|---------------------------------------------------------------------------------------------------------------------------------------------------------------------------------------------------------------------------------------------------------------------------------------------------------------------------------------------------------------------------------------------------------------------------------------------------------------------------------------------------------------------------------------------------------------------------------------------------------------------------------------------------------------------------------------------------------------------------------------------|--|--|--|--|--|--|--|--|
| <b>Day 3</b>    | <table border="1" style="display: inline-table; width: 40px; height: 20px;"> <tr><td style="width: 10px; height: 10px;"></td><td style="width: 10px; height: 10px;"></td><td style="width: 10px; height: 10px;"></td><td style="width: 10px; height: 10px;"></td></tr> </table> <span style="margin: 0 5px;">/</span> <table border="1" style="display: inline-table; width: 40px; height: 20px;"> <tr><td style="width: 10px; height: 10px;"></td><td style="width: 10px; height: 10px;"></td></tr> </table> <span style="margin: 0 5px;">/</span> <table border="1" style="display: inline-table; width: 40px; height: 20px;"> <tr><td style="width: 10px; height: 10px;"></td><td style="width: 10px; height: 10px;"></td></tr> </table> |  |  |  |  |  |  |  |  |
|                 |                                                                                                                                                                                                                                                                                                                                                                                                                                                                                                                                                                                                                                                                                                                                             |  |  |  |  |  |  |  |  |
|                 |                                                                                                                                                                                                                                                                                                                                                                                                                                                                                                                                                                                                                                                                                                                                             |  |  |  |  |  |  |  |  |
|                 |                                                                                                                                                                                                                                                                                                                                                                                                                                                                                                                                                                                                                                                                                                                                             |  |  |  |  |  |  |  |  |
|                 | <span style="margin-right: 40px;">year</span> <span style="margin-right: 40px;">month</span> <span>day</span>                                                                                                                                                                                                                                                                                                                                                                                                                                                                                                                                                                                                                               |  |  |  |  |  |  |  |  |
| <b>Day 10</b>   | <table border="1" style="display: inline-table; width: 40px; height: 20px;"> <tr><td style="width: 10px; height: 10px;"></td><td style="width: 10px; height: 10px;"></td><td style="width: 10px; height: 10px;"></td><td style="width: 10px; height: 10px;"></td></tr> </table> <span style="margin: 0 5px;">/</span> <table border="1" style="display: inline-table; width: 40px; height: 20px;"> <tr><td style="width: 10px; height: 10px;"></td><td style="width: 10px; height: 10px;"></td></tr> </table> <span style="margin: 0 5px;">/</span> <table border="1" style="display: inline-table; width: 40px; height: 20px;"> <tr><td style="width: 10px; height: 10px;"></td><td style="width: 10px; height: 10px;"></td></tr> </table> |  |  |  |  |  |  |  |  |
|                 |                                                                                                                                                                                                                                                                                                                                                                                                                                                                                                                                                                                                                                                                                                                                             |  |  |  |  |  |  |  |  |
|                 |                                                                                                                                                                                                                                                                                                                                                                                                                                                                                                                                                                                                                                                                                                                                             |  |  |  |  |  |  |  |  |
|                 |                                                                                                                                                                                                                                                                                                                                                                                                                                                                                                                                                                                                                                                                                                                                             |  |  |  |  |  |  |  |  |
| <b>6 Weeks</b>  | <table border="1" style="display: inline-table; width: 40px; height: 20px;"> <tr><td style="width: 10px; height: 10px;"></td><td style="width: 10px; height: 10px;"></td><td style="width: 10px; height: 10px;"></td><td style="width: 10px; height: 10px;"></td></tr> </table> <span style="margin: 0 5px;">/</span> <table border="1" style="display: inline-table; width: 40px; height: 20px;"> <tr><td style="width: 10px; height: 10px;"></td><td style="width: 10px; height: 10px;"></td></tr> </table> <span style="margin: 0 5px;">/</span> <table border="1" style="display: inline-table; width: 40px; height: 20px;"> <tr><td style="width: 10px; height: 10px;"></td><td style="width: 10px; height: 10px;"></td></tr> </table> |  |  |  |  |  |  |  |  |
|                 |                                                                                                                                                                                                                                                                                                                                                                                                                                                                                                                                                                                                                                                                                                                                             |  |  |  |  |  |  |  |  |
|                 |                                                                                                                                                                                                                                                                                                                                                                                                                                                                                                                                                                                                                                                                                                                                             |  |  |  |  |  |  |  |  |
|                 |                                                                                                                                                                                                                                                                                                                                                                                                                                                                                                                                                                                                                                                                                                                                             |  |  |  |  |  |  |  |  |
| <b>12 Weeks</b> | <table border="1" style="display: inline-table; width: 40px; height: 20px;"> <tr><td style="width: 10px; height: 10px;"></td><td style="width: 10px; height: 10px;"></td><td style="width: 10px; height: 10px;"></td><td style="width: 10px; height: 10px;"></td></tr> </table> <span style="margin: 0 5px;">/</span> <table border="1" style="display: inline-table; width: 40px; height: 20px;"> <tr><td style="width: 10px; height: 10px;"></td><td style="width: 10px; height: 10px;"></td></tr> </table> <span style="margin: 0 5px;">/</span> <table border="1" style="display: inline-table; width: 40px; height: 20px;"> <tr><td style="width: 10px; height: 10px;"></td><td style="width: 10px; height: 10px;"></td></tr> </table> |  |  |  |  |  |  |  |  |
|                 |                                                                                                                                                                                                                                                                                                                                                                                                                                                                                                                                                                                                                                                                                                                                             |  |  |  |  |  |  |  |  |
|                 |                                                                                                                                                                                                                                                                                                                                                                                                                                                                                                                                                                                                                                                                                                                                             |  |  |  |  |  |  |  |  |
|                 |                                                                                                                                                                                                                                                                                                                                                                                                                                                                                                                                                                                                                                                                                                                                             |  |  |  |  |  |  |  |  |
| <b>5 Months</b> | <table border="1" style="display: inline-table; width: 40px; height: 20px;"> <tr><td style="width: 10px; height: 10px;"></td><td style="width: 10px; height: 10px;"></td><td style="width: 10px; height: 10px;"></td><td style="width: 10px; height: 10px;"></td></tr> </table> <span style="margin: 0 5px;">/</span> <table border="1" style="display: inline-table; width: 40px; height: 20px;"> <tr><td style="width: 10px; height: 10px;"></td><td style="width: 10px; height: 10px;"></td></tr> </table> <span style="margin: 0 5px;">/</span> <table border="1" style="display: inline-table; width: 40px; height: 20px;"> <tr><td style="width: 10px; height: 10px;"></td><td style="width: 10px; height: 10px;"></td></tr> </table> |  |  |  |  |  |  |  |  |
|                 |                                                                                                                                                                                                                                                                                                                                                                                                                                                                                                                                                                                                                                                                                                                                             |  |  |  |  |  |  |  |  |
|                 |                                                                                                                                                                                                                                                                                                                                                                                                                                                                                                                                                                                                                                                                                                                                             |  |  |  |  |  |  |  |  |
|                 |                                                                                                                                                                                                                                                                                                                                                                                                                                                                                                                                                                                                                                                                                                                                             |  |  |  |  |  |  |  |  |
| <b>1 Year</b>   | <table border="1" style="display: inline-table; width: 40px; height: 20px;"> <tr><td style="width: 10px; height: 10px;"></td><td style="width: 10px; height: 10px;"></td><td style="width: 10px; height: 10px;"></td><td style="width: 10px; height: 10px;"></td></tr> </table> <span style="margin: 0 5px;">/</span> <table border="1" style="display: inline-table; width: 40px; height: 20px;"> <tr><td style="width: 10px; height: 10px;"></td><td style="width: 10px; height: 10px;"></td></tr> </table> <span style="margin: 0 5px;">/</span> <table border="1" style="display: inline-table; width: 40px; height: 20px;"> <tr><td style="width: 10px; height: 10px;"></td><td style="width: 10px; height: 10px;"></td></tr> </table> |  |  |  |  |  |  |  |  |
|                 |                                                                                                                                                                                                                                                                                                                                                                                                                                                                                                                                                                                                                                                                                                                                             |  |  |  |  |  |  |  |  |
|                 |                                                                                                                                                                                                                                                                                                                                                                                                                                                                                                                                                                                                                                                                                                                                             |  |  |  |  |  |  |  |  |
|                 |                                                                                                                                                                                                                                                                                                                                                                                                                                                                                                                                                                                                                                                                                                                                             |  |  |  |  |  |  |  |  |
| <b>2 Year</b>   | <table border="1" style="display: inline-table; width: 40px; height: 20px;"> <tr><td style="width: 10px; height: 10px;"></td><td style="width: 10px; height: 10px;"></td><td style="width: 10px; height: 10px;"></td><td style="width: 10px; height: 10px;"></td></tr> </table> <span style="margin: 0 5px;">/</span> <table border="1" style="display: inline-table; width: 40px; height: 20px;"> <tr><td style="width: 10px; height: 10px;"></td><td style="width: 10px; height: 10px;"></td></tr> </table> <span style="margin: 0 5px;">/</span> <table border="1" style="display: inline-table; width: 40px; height: 20px;"> <tr><td style="width: 10px; height: 10px;"></td><td style="width: 10px; height: 10px;"></td></tr> </table> |  |  |  |  |  |  |  |  |
|                 |                                                                                                                                                                                                                                                                                                                                                                                                                                                                                                                                                                                                                                                                                                                                             |  |  |  |  |  |  |  |  |
|                 |                                                                                                                                                                                                                                                                                                                                                                                                                                                                                                                                                                                                                                                                                                                                             |  |  |  |  |  |  |  |  |
|                 |                                                                                                                                                                                                                                                                                                                                                                                                                                                                                                                                                                                                                                                                                                                                             |  |  |  |  |  |  |  |  |
| <b>3 Year</b>   | <table border="1" style="display: inline-table; width: 40px; height: 20px;"> <tr><td style="width: 10px; height: 10px;"></td><td style="width: 10px; height: 10px;"></td><td style="width: 10px; height: 10px;"></td><td style="width: 10px; height: 10px;"></td></tr> </table> <span style="margin: 0 5px;">/</span> <table border="1" style="display: inline-table; width: 40px; height: 20px;"> <tr><td style="width: 10px; height: 10px;"></td><td style="width: 10px; height: 10px;"></td></tr> </table> <span style="margin: 0 5px;">/</span> <table border="1" style="display: inline-table; width: 40px; height: 20px;"> <tr><td style="width: 10px; height: 10px;"></td><td style="width: 10px; height: 10px;"></td></tr> </table> |  |  |  |  |  |  |  |  |
|                 |                                                                                                                                                                                                                                                                                                                                                                                                                                                                                                                                                                                                                                                                                                                                             |  |  |  |  |  |  |  |  |
|                 |                                                                                                                                                                                                                                                                                                                                                                                                                                                                                                                                                                                                                                                                                                                                             |  |  |  |  |  |  |  |  |
|                 |                                                                                                                                                                                                                                                                                                                                                                                                                                                                                                                                                                                                                                                                                                                                             |  |  |  |  |  |  |  |  |

13. What is the child's ethnicity?

- Asian
- Black
- Hispanic
- White
- Other

PID:

|  |  |   |  |  |  |
|--|--|---|--|--|--|
|  |  | - |  |  |  |
|--|--|---|--|--|--|

Mother's Date of Birth:

|      |  |  |  |       |  |     |  |  |
|------|--|--|--|-------|--|-----|--|--|
|      |  |  |  |       |  |     |  |  |
| year |  |  |  | month |  | day |  |  |

**3 YEARS – PART 1**

---

14. Was a blood sample taken?

No

→ if no, indicate the following:

- Not attempted
- Attempted, not able to obtain a sample
- Parent declined
- Child declined

Yes

→ if yes, indicate the following:

Date Collected

|      |  |  |  |       |  |     |   |  |  |
|------|--|--|--|-------|--|-----|---|--|--|
|      |  |  |  | /     |  |     | / |  |  |
| year |  |  |  | month |  | day |   |  |  |

→ if yes, when did your child last eat or drink anything except water?

- < 1 hour before
- 1-3 hours before
- > 3 hours before
- Overnight

→ if yes, did your child experience any of the following in the 48 hours prior to blood collection?

|                      | <b>No</b>                | <b>Yes</b>               |
|----------------------|--------------------------|--------------------------|
| Fever                | <input type="checkbox"/> | <input type="checkbox"/> |
| Runny/stuffy nose    | <input type="checkbox"/> | <input type="checkbox"/> |
| Cough                | <input type="checkbox"/> | <input type="checkbox"/> |
| Diarrhea or vomiting | <input type="checkbox"/> | <input type="checkbox"/> |

|  |  |   |  |  |
|--|--|---|--|--|
|  |  | - |  |  |
|--|--|---|--|--|

|      |  |  |  |       |  |     |  |
|------|--|--|--|-------|--|-----|--|
|      |  |  |  |       |  |     |  |
| year |  |  |  | month |  | day |  |

**3 YEARS – PART 1**

---

15. Was a DXA scan performed?

No

↳ if no, indicate the following:

- Not attempted
- Attempted, not able to obtain a reading
- Parent declined
- Child declined

Yes

↳ if yes, indicate the following:

Date Performed

|      |  |  |  |   |       |  |   |     |  |
|------|--|--|--|---|-------|--|---|-----|--|
|      |  |  |  | / |       |  | / |     |  |
| year |  |  |  |   | month |  |   | day |  |

↳ if yes, indicate the following:

a) **Bone** (Ancillary Results [Total Body] page, Summary Sheet)

- i. BA 

|  |  |  |  |  |  |
|--|--|--|--|--|--|
|  |  |  |  |  |  |
|--|--|--|--|--|--|

 . 

|  |  |
|--|--|
|  |  |
|--|--|

 cm<sup>2</sup>
- ii. BMC 

|  |  |  |  |  |  |  |  |
|--|--|--|--|--|--|--|--|
|  |  |  |  |  |  |  |  |
|--|--|--|--|--|--|--|--|

 . 

|  |  |
|--|--|
|  |  |
|--|--|

 g
- iii. BMD 

|  |  |  |
|--|--|--|
|  |  |  |
|--|--|--|

 . 

|  |
|--|
|  |
|--|

 g/cm<sup>2</sup>
- iv. BMD z-score (age-matched) 

|  |
|--|
|  |
|--|

|  |
|--|
|  |
|--|

 . 

|  |
|--|
|  |
|--|

  
(+/-)

b) **Fat and Lean Mass** (Body Composition page)

- i. Fat 

|  |  |  |  |  |  |
|--|--|--|--|--|--|
|  |  |  |  |  |  |
|--|--|--|--|--|--|

 . 

|  |
|--|
|  |
|--|

 g
- ii. Lean 

|  |  |  |  |  |  |  |  |
|--|--|--|--|--|--|--|--|
|  |  |  |  |  |  |  |  |
|--|--|--|--|--|--|--|--|

 . 

|  |
|--|
|  |
|--|

 g
- iii. % Fat 

|  |  |  |
|--|--|--|
|  |  |  |
|--|--|--|

 . 

|  |
|--|
|  |
|--|

 %
- iv. Total Mass 

|  |  |
|--|--|
|  |  |
|--|--|

 . 

|  |
|--|
|  |
|--|

 kg



PID:

|  |  |   |  |  |
|--|--|---|--|--|
|  |  | - |  |  |
|--|--|---|--|--|

Mother's Date of Birth:

|  |  |  |  |
|--|--|--|--|
|  |  |  |  |
|--|--|--|--|

year

|  |  |
|--|--|
|  |  |
|--|--|

month

|  |  |
|--|--|
|  |  |
|--|--|

day

**3 YEARS – PART 1**

---

**c) Fat Distribution – Trunk (Body Composition page)**

- i. Android (% fat)    

|  |  |
|--|--|
|  |  |
|--|--|

 . 

|  |
|--|
|  |
|--|

 %
- ii. Gynoid (% fat)    

|  |  |
|--|--|
|  |  |
|--|--|

 . 

|  |
|--|
|  |
|--|

 %
- iii. Trunk (% fat)    

|  |  |
|--|--|
|  |  |
|--|--|

 . 

|  |
|--|
|  |
|--|

 %
- iv. Fat (trunk total)    

|  |  |  |  |  |
|--|--|--|--|--|
|  |  |  |  |  |
|--|--|--|--|--|

 . 

|  |
|--|
|  |
|--|

 g
- v. Lean (trunk total)    

|  |  |  |  |  |
|--|--|--|--|--|
|  |  |  |  |  |
|--|--|--|--|--|

 . 

|  |
|--|
|  |
|--|

 g

**d) Fat Mass Ratio (Body Composition page)**

- vi. Trunk/Total    

|  |  |
|--|--|
|  |  |
|--|--|

 . 

|  |  |
|--|--|
|  |  |
|--|--|
- vii. Legs/Total    

|  |  |
|--|--|
|  |  |
|--|--|

 . 

|  |  |
|--|--|
|  |  |
|--|--|
- viii. Arms+Legs/Total    

|  |  |
|--|--|
|  |  |
|--|--|

 . 

|  |  |
|--|--|
|  |  |
|--|--|

PID:

-

Mother's Date of Birth:

year

month

day

**3 YEARS – PART 2**

**Instructions:**

- Mark only one box with an "X" for each question, unless instructed to do otherwise.
- Please use your study diary to help you remember the information asked for.
- All of your answers will remain confidential.
- If you do not understand a question, please ask a research staff member.

1. Have you **ever** breast fed your child?

No

Yes

↳ if yes, **do you still** breastfeed your child?

No

↳ if no, how old was your child when you stopped breast feeding?

.  months

(fill in "0" if your child was less than 1 month old)

Yes

2. Does your child eat a special diet?

No

Yes

↳ if yes, check all that apply:

Vegetarian

Vegan

Gluten free

Dairy free

Other:

\_\_\_\_\_

PID:

|  |  |   |  |  |  |
|--|--|---|--|--|--|
|  |  | - |  |  |  |
|--|--|---|--|--|--|

Mother's Date of Birth:

|      |  |  |  |       |  |     |  |
|------|--|--|--|-------|--|-----|--|
|      |  |  |  |       |  |     |  |
| year |  |  |  | month |  | day |  |

**3 YEARS – PART 2**

---

3. Are you **currently** having difficulties feeding your child?

- No, no difficulties
- Yes, some difficulties
- Yes, great difficulties

4. Does your child typically have **at least one** bowel movement every day?

- No  
↳ if no, how many bowel movements does your child have in a **typical week**?  

|  |  |
|--|--|
|  |  |
|--|--|

 bowel movements
- Yes  
↳ if yes, how many bowel movements does your child have in a **typical day**?  

|  |  |
|--|--|
|  |  |
|--|--|

 bowel movements

5. **In the last month**, has your child had any episodes of abdominal pain or discomfort?

- No
- Yes

PID:

|  |  |   |  |  |  |
|--|--|---|--|--|--|
|  |  | - |  |  |  |
|--|--|---|--|--|--|

Mother's Date of Birth:

|      |  |  |  |       |  |     |  |  |
|------|--|--|--|-------|--|-----|--|--|
|      |  |  |  |       |  |     |  |  |
| year |  |  |  | month |  | day |  |  |

**3 YEARS – PART 2**

---

Below are questions about your child's eating and other habits. Think about your child's every day habits when answering. Check only one answer for each question.

6. My child usually eats grain products (examples are bread, bagel, bun, cereal, pasta, rice, roti and tortillas):
  - More than 5 times a day
  - 4 to 5 times a day
  - 2 to 3 times a day
  - Less than 2 times a day
  
7. My child usually has milk products (examples are white or chocolate milk, cheese, yogurt, milk puddings or milk substitutes, such as fortified soy beverages):
  - More than 3 times a day
  - 3 times a day
  - 2 times a day
  - Once a day or less
  
8. My child usually eats fruit:
  - More than 3 times a day
  - 3 times a day
  - 2 times a day
  - Once a day
  - Not at all
  
9. My child usually eats vegetables:
  - More than 2 times a day
  - 2 times a day
  - Once a day
  - Not at all
  
10. My child usually eats meat, fish, poultry or alternatives (alternatives can be eggs, peanut butter, tofu, nuts or fried beans, peas and lentils):
  - More than 2 times a day
  - 2 times a day
  - Once a day
  - A few times a week
  - Not at all

|  |  |   |  |  |  |
|--|--|---|--|--|--|
|  |  | - |  |  |  |
|--|--|---|--|--|--|

|      |  |  |  |       |  |     |  |
|------|--|--|--|-------|--|-----|--|
|      |  |  |  |       |  |     |  |
| year |  |  |  | month |  | day |  |

**3 YEARS – PART 2**

---

11. My child usually eats "fast food":

- 4 or more times a week
- 2 to 3 times a week
- Once a week
- A few times a month
- Once a month or less

12. I have difficulty buying food to feed my child because food is expensive:

- Most of the time
- Sometimes
- Rarely
- Never

13. My child has problems chewing, swallowing, gagging or choking when eating:

- Most of the time
- Sometimes
- Rarely
- Never

14. My child is not hungry at mealtimes because he/she drinks all day:

- Most of the time
- Sometimes
- Rarely
- Never

15. My child usually eats:

- Less than 2 times a day
- 2 times a day
- 3 to 4 times a day
- 5 times a day
- More than 5 times a day

16. I let my child decide how much to eat:

- Always
- Most of the time
- Sometimes
- Rarely
- Never

### 3 YEARS – PART 2

---

17. My child eats meals while watching TV:

- Always
- Most of the time
- Sometimes
- Rarely
- Never

18. My child usually takes supplements: (Examples are multivitamins, iron drops, cod liver oil)

- Always
- Most of the time
- Sometimes
- Rarely
- Never

19. My child:

- Needs more physical activity
- Gets enough physical activity

20. My child usually watches TV, uses the computer or plays video games:

- 5 or more hours a day
- 4 hours a day
- 3 hours a day
- 2 hours a day
- 1 hour or less a day

21. I am comfortable with how my child is growing:

- Yes
- No

22. My child:

- Should weight more
- Is about the right weight
- Should weigh less

**3 YEARS – PART 2**

23. *Since your last study visit or phone call*, has **your child** had an infection that required antibiotic or antifungal (anti-yeast) treatment?

- No
- Yes → if yes, please complete the following table:

**DRUG 1**

What was the type of infection?  Thrush  Ear infection  Chest infection  
 Urinary tract infection  Other: \_\_\_\_\_

What was the name of the drug? \_\_\_\_\_

How was it given?  Topical  Oral  Other: \_\_\_\_\_

What was the start date?     /   /    
 year month day

What was the end date?     /   /   or  Still currently in use  
 year month day

**DRUG 2**  N/A (Do not complete the rest of the table)

What was the type of infection?  Thrush  Ear infection  Chest infection  
 Urinary tract infection  Other: \_\_\_\_\_

What was the name of the second drug? \_\_\_\_\_

How was it given?  Topical  Oral  Other: \_\_\_\_\_

What was the start date?     /   /    
 year month day

What was the end date?     /   /   or  Still currently in use  
 year month day

PID:

|  |  |   |  |  |
|--|--|---|--|--|
|  |  | - |  |  |
|--|--|---|--|--|

Mother's Date of Birth:

|      |  |  |  |       |  |     |
|------|--|--|--|-------|--|-----|
|      |  |  |  |       |  |     |
| year |  |  |  | month |  | day |

**3 YEARS – PART 2**

---

24. Please list any other medications, vitamins, homeopathics or supplements that ***your child*** has taken ***since your last study visit or phone call.***

None

| <u>Medication, vitamin or supplement name</u> | <u>Currently in Use?</u> |                          |
|-----------------------------------------------|--------------------------|--------------------------|
|                                               | <b>No</b>                | <b>Yes</b>               |
| a. _____                                      | <input type="checkbox"/> | <input type="checkbox"/> |
| b. _____                                      | <input type="checkbox"/> | <input type="checkbox"/> |
| c. _____                                      | <input type="checkbox"/> | <input type="checkbox"/> |
| d. _____                                      | <input type="checkbox"/> | <input type="checkbox"/> |
| e. _____                                      | <input type="checkbox"/> | <input type="checkbox"/> |
| f. _____                                      | <input type="checkbox"/> | <input type="checkbox"/> |
| g. _____                                      | <input type="checkbox"/> | <input type="checkbox"/> |

25. ***Since your last study visit or phone call,*** has your child needed to stay in the hospital?

- No
- Yes



PID:   -

Mother's Date of Birth:

year month day

**3 YEARS – PART 2**

26. **If you are currently breastfeeding**, have **you** taken any antibiotic or antifungal (anti-yeast) medications **since your last study visit or phone call?**

- Not currently breastfeeding
- No
- Yes → if yes, please complete the following table:

**DRUG 1**

What was the name of the drug? \_\_\_\_\_

How was it given?  Topical  Oral  Other: \_\_\_\_\_

What was the start date?     /   /    
 year month day

What was the end date?     /   /   or  Still currently in use

**DRUG 2**

Only one drug was taken. (Do not complete the rest of the table)

What was the name of the second drug? \_\_\_\_\_

How was it given?  Topical  Oral  Other: \_\_\_\_\_

What was the start date?     /   /    
 year month day

What was the end date?     /   /   or  Still currently in use

**3 YEARS – PART 2**

27. **If you are currently breastfeeding**, please list any other prescription medications that **you** have taken **since your last study visit or phone call**.

- Not currently breastfeeding
- None

| <u>Medication name</u> | <u>Currently in Use?</u> |                          |
|------------------------|--------------------------|--------------------------|
|                        | <b>No</b>                | <b>Yes</b>               |
| a. _____               | <input type="checkbox"/> | <input type="checkbox"/> |
| b. _____               | <input type="checkbox"/> | <input type="checkbox"/> |
| c. _____               | <input type="checkbox"/> | <input type="checkbox"/> |
| d. _____               | <input type="checkbox"/> | <input type="checkbox"/> |
| e. _____               | <input type="checkbox"/> | <input type="checkbox"/> |
| f. _____               | <input type="checkbox"/> | <input type="checkbox"/> |
| g. _____               | <input type="checkbox"/> | <input type="checkbox"/> |

28. How much time does your child spend in sleep during the night (between 7 in the evening and 7 in the morning)?   hours,   minutes

29. How many times does your child wake up during the night?  
  times

30. How much time during the night does your child spend in wakefulness (from 10 in the evening to 6 in the morning)?   hours,   minutes

31. Do you consider your child's sleep to be a problem?
- Not a problem at all
  - A small problem
  - A very serious problem

PID:

|  |  |   |  |  |  |
|--|--|---|--|--|--|
|  |  | - |  |  |  |
|--|--|---|--|--|--|

Mother's Date of Birth:

|  |  |  |  |  |  |  |  |
|--|--|--|--|--|--|--|--|
|  |  |  |  |  |  |  |  |
|--|--|--|--|--|--|--|--|

year

month

day

**3 YEARS – PART 2**

---

32. Has your child been diagnosed with asthma or reactive airway disease by your doctor?

- Yes
- No

33. Has your child **ever** had wheezing?

- Yes
- No

34. Has your child **ever** had a problem with sneezing or a runny nose or a blocked nose when he/she **did not** have a cold or flu?

- Yes
- No

35. Does your child take any puffers or breathing medications?

- Yes
- No

36. Have you been told by your doctor that your child has "hay fever"?

- Yes
- No

|  |  |   |  |  |  |
|--|--|---|--|--|--|
|  |  | - |  |  |  |
|--|--|---|--|--|--|

|      |  |  |  |       |  |     |  |
|------|--|--|--|-------|--|-----|--|
|      |  |  |  |       |  |     |  |
| year |  |  |  | month |  | day |  |

**3 YEARS – PART 2**

37. Has your child **ever** had an itchy rash which was coming and going for at least 6 months?

- No
- Yes

↳ If yes, has your child has this itchy rash at any time in the last 12 months?

- No
- Yes

→ If yes, has this itchy rash at any time affected any of the following places: the folds of the elbows, behind the knees, in front of the ankles, under the buttocks, or around the neck ears or eyes?

- Yes
- No

→ If yes, at what age did this itchy rash first occur?

One year of age or less

- Under 1 year
- Age 1 to 2
- Age 2 or more

→ If yes, has this rash cleared completely at any time during the last 12 months?

- Yes
- No

→ If yes, in the last 12 months, how often, on average, has your child been kept awake at night by this itchy rash?

- Never in the last 12 months
- Less than one night per week
- One or more nights per week

38. Has your child **ever** had eczema?

- Yes
- No

**3 YEARS – PART 2**

39. Have you **ever** been told by your doctor that your child has an allergy?

- No
- Yes

↳ if yes, please specify the allergic substance(s) :

\_\_\_\_\_

\_\_\_\_\_

40. **In the last year**, has your child been regularly exposed to tobacco smoke? (regularly is defined as most days or nights)

- No
- Yes

41. **In the last year**, has your child travelled outside of Canada or the United States?

- No
- Yes → if yes, please indicate the country, date and duration of stay of each trip:

| <u>Country</u> | <u>Date of arrival</u>                                                                                                                                                                        | <u>Duration of visit</u> |
|----------------|-----------------------------------------------------------------------------------------------------------------------------------------------------------------------------------------------|--------------------------|
| a. _____       | <input type="text"/> <input type="text"/> <input type="text"/> <input type="text"/> / <input type="text"/> <input type="text"/> / <input type="text"/> <input type="text"/><br>year month day | _____                    |
| b. _____       | <input type="text"/> <input type="text"/> <input type="text"/> <input type="text"/> / <input type="text"/> <input type="text"/> / <input type="text"/> <input type="text"/>                   | _____                    |
| c. _____       | <input type="text"/> <input type="text"/> <input type="text"/> <input type="text"/> / <input type="text"/> <input type="text"/> / <input type="text"/> <input type="text"/>                   | _____                    |
| d. _____       | <input type="text"/> <input type="text"/> <input type="text"/> <input type="text"/> / <input type="text"/> <input type="text"/> / <input type="text"/> <input type="text"/>                   | _____                    |
| e. _____       | <input type="text"/> <input type="text"/> <input type="text"/> <input type="text"/> / <input type="text"/> <input type="text"/> / <input type="text"/> <input type="text"/>                   | _____                    |

42. What type of water does your child drink most often?

- Well water
- Bottled water
- Municipal water
- Municipal water with home filtration system

|  |  |   |  |  |
|--|--|---|--|--|
|  |  | - |  |  |
|--|--|---|--|--|

|      |  |  |  |       |  |     |  |  |
|------|--|--|--|-------|--|-----|--|--|
|      |  |  |  |       |  |     |  |  |
| year |  |  |  | month |  | day |  |  |

**3 YEARS – PART 2**

43. Does your child attend daycare or preschool?

No

↳ if no, who cares for your child? (check all that apply)

Parent

Grandparent / other extended family member

Nanny / babysitter

Yes

↳ if yes, how old was your child when they first attended?

|  |  |   |  |        |
|--|--|---|--|--------|
|  |  | . |  | months |
|--|--|---|--|--------|

↳ if yes, please indicate the type of care:

Home daycare

Centre-based daycare

Preschool

↳ if yes, please indicate the frequency of attendance:

Part-time

Full-time

44. We are interested in knowing about your child's exposure to household animals at your home or the home of a regular care provider. If your child has been regularly exposed (most days or nights) to animals during any of the age ranges listed below, please indicate it by checking the boxes that apply.

|                                                       | Never                    | Less than<br>3 months<br>old | 3 months to<br>6 months<br>old | 6 months to<br>1 year old | 1 year to<br>2 years old | 2 years to<br>3 years old |
|-------------------------------------------------------|--------------------------|------------------------------|--------------------------------|---------------------------|--------------------------|---------------------------|
| Animals that stayed <b>inside</b> the house.          | <input type="checkbox"/> | <input type="checkbox"/>     | <input type="checkbox"/>       | <input type="checkbox"/>  | <input type="checkbox"/> | <input type="checkbox"/>  |
| Animals that went <b>outside and inside</b> the house | <input type="checkbox"/> | <input type="checkbox"/>     | <input type="checkbox"/>       | <input type="checkbox"/>  | <input type="checkbox"/> | <input type="checkbox"/>  |
| Animals that stayed <b>outside</b> the house          | <input type="checkbox"/> | <input type="checkbox"/>     | <input type="checkbox"/>       | <input type="checkbox"/>  | <input type="checkbox"/> | <input type="checkbox"/>  |

### 3 YEARS – PART 2

For each of the items below please mark the box for “Not True”, “Somewhat True” or “Certainly True” based on **your child's** behaviour **over the last 6 months**. Please answer all items as best as you can even if you are not absolutely certain.

|                                                                           | Not<br>true              | Somewhat<br>true         | Certainly<br>true        |
|---------------------------------------------------------------------------|--------------------------|--------------------------|--------------------------|
| 45. Considerate of other people's feelings                                | <input type="checkbox"/> | <input type="checkbox"/> | <input type="checkbox"/> |
| 46. Restless, overactive, cannot stay still for long                      | <input type="checkbox"/> | <input type="checkbox"/> | <input type="checkbox"/> |
| 47. Often complains of headaches, stomach-aches or sickness               | <input type="checkbox"/> | <input type="checkbox"/> | <input type="checkbox"/> |
| 48. Shares readily with other children, for example toys, treats, pencils | <input type="checkbox"/> | <input type="checkbox"/> | <input type="checkbox"/> |
| 49. Often loses temper                                                    | <input type="checkbox"/> | <input type="checkbox"/> | <input type="checkbox"/> |
| 50. Rather solitary, prefers to play alone                                | <input type="checkbox"/> | <input type="checkbox"/> | <input type="checkbox"/> |
| 51. Generally well behaved, usually does what adults request              | <input type="checkbox"/> | <input type="checkbox"/> | <input type="checkbox"/> |
| 52. Many worries or often seems worried                                   | <input type="checkbox"/> | <input type="checkbox"/> | <input type="checkbox"/> |
| 53. Helpful if someone is hurt, upset or feeling ill                      | <input type="checkbox"/> | <input type="checkbox"/> | <input type="checkbox"/> |
| 54. Constantly fidgeting or squirming                                     | <input type="checkbox"/> | <input type="checkbox"/> | <input type="checkbox"/> |
| 55. Has at least one good friend                                          | <input type="checkbox"/> | <input type="checkbox"/> | <input type="checkbox"/> |
| 56. Often fights with other children or bullies them                      | <input type="checkbox"/> | <input type="checkbox"/> | <input type="checkbox"/> |
| 57. Often unhappy, depressed or tearful                                   | <input type="checkbox"/> | <input type="checkbox"/> | <input type="checkbox"/> |
| 58. Generally liked by other children                                     | <input type="checkbox"/> | <input type="checkbox"/> | <input type="checkbox"/> |
| 59. Easily distracted, concentration wanders                              | <input type="checkbox"/> | <input type="checkbox"/> | <input type="checkbox"/> |
| 60. Nervous or clingy in new situations, easily loses confidence          | <input type="checkbox"/> | <input type="checkbox"/> | <input type="checkbox"/> |
| 61. Kind to younger children                                              | <input type="checkbox"/> | <input type="checkbox"/> | <input type="checkbox"/> |
| 62. Often argumentative with adults                                       | <input type="checkbox"/> | <input type="checkbox"/> | <input type="checkbox"/> |
| 63. Picked on or bullied by other children                                | <input type="checkbox"/> | <input type="checkbox"/> | <input type="checkbox"/> |
| 64. Often offers to help others (parents, teachers, other children)       | <input type="checkbox"/> | <input type="checkbox"/> | <input type="checkbox"/> |
| 65. Can stop and think things out before acting                           | <input type="checkbox"/> | <input type="checkbox"/> | <input type="checkbox"/> |
| 66. Can be spiteful to others                                             | <input type="checkbox"/> | <input type="checkbox"/> | <input type="checkbox"/> |
| 67. Gets along better with adults than with other children                | <input type="checkbox"/> | <input type="checkbox"/> | <input type="checkbox"/> |
| 68. Many fears, easily scared                                             | <input type="checkbox"/> | <input type="checkbox"/> | <input type="checkbox"/> |
| 69. Good attention span, sees work through to the end                     | <input type="checkbox"/> | <input type="checkbox"/> | <input type="checkbox"/> |

**3 YEARS – PART 2**

70. Overall, do you think that your child has difficulties in one or more of the following areas: emotions, concentration, behaviour, or being able to get along with other people?

- No
- Yes, minor difficulties
- Yes, definite difficulties
- Yes, severe difficulties

→ If yes, how long have these difficulties been present?

- Less than a month
- 1 to 5 months
- 6 to 12 months
- Over a year

→ If yes, do the difficulties upset or distress your child?

- Not at all
- Only a little
- A medium amount
- A great deal

→ If yes, do the difficulties interfere with your child's everyday life in the following areas?

|                    | Not at all               | Only a little            | A medium amount          | A great deal             |
|--------------------|--------------------------|--------------------------|--------------------------|--------------------------|
| Home life          | <input type="checkbox"/> | <input type="checkbox"/> | <input type="checkbox"/> | <input type="checkbox"/> |
| Friendships        | <input type="checkbox"/> | <input type="checkbox"/> | <input type="checkbox"/> | <input type="checkbox"/> |
| Learning           | <input type="checkbox"/> | <input type="checkbox"/> | <input type="checkbox"/> | <input type="checkbox"/> |
| Leisure activities | <input type="checkbox"/> | <input type="checkbox"/> | <input type="checkbox"/> | <input type="checkbox"/> |

→ If yes, do the difficulties put a burden on you or the family as a whole?

- Not at all
- Only a little
- A medium amount
- A great deal



PID:

|  |  |   |  |  |  |
|--|--|---|--|--|--|
|  |  | - |  |  |  |
|--|--|---|--|--|--|

Mother's Date of Birth:

|      |  |  |  |       |  |     |  |
|------|--|--|--|-------|--|-----|--|
|      |  |  |  |       |  |     |  |
| year |  |  |  | month |  | day |  |

**3 YEARS – PART 2**

---

On the next pages you will see a set of statements that describe children's reactions to a number of situations. We would like you to tell us what ***your child's*** reaction is likely to be in those situations. There are of course no "correct" ways of reacting; children differ widely in their reactions and it is these differences that we are trying to learn about. Please read each statement and decide whether it is a "true" or "untrue" description of your child's reaction ***within the past six months***. Use the following scale to indicate how well a statement describes your child:

- 1 extremely untrue of your child
- 2 quite untrue of your child
- 3 slightly untrue of your child
- 4 neither true nor untrue of your child
- 5 slightly true of your child
- 6 quite true of your child
- 7 extremely true of your child

If you cannot answer one of the items because you have never seen the child in that situation, then circle NA (not applicable). Please be sure to circle a number or NA for every item.

**3 YEARS – PART 2**

|                  |              |                 |                         |               |            |                |                |
|------------------|--------------|-----------------|-------------------------|---------------|------------|----------------|----------------|
| 1                | 2            | 3               | 4                       | 5             | 6          | 7              | NA             |
| Extremely untrue | Quite untrue | Slightly untrue | Neither true nor untrue | Slightly true | Quite true | Extremely true | Not applicable |

**My child:**

71. Seems always in a big hurry to get from one place to another.  
 1 2 3 4 5 6 7 NA

72. Gets quite frustrated when prevented from doing something s/he wants to do.  
 1 2 3 4 5 6 7 NA

73. When drawing or colouring in a book, shows strong concentration.  
 1 2 3 4 5 6 7 NA

74. Likes going down high slides or other adventurous activities.  
 1 2 3 4 5 6 7 NA

75. Is quite upset by a little cut or bruise.  
 1 2 3 4 5 6 7 NA

76. Prepares for trips and outings by planning things s/he will need.  
 1 2 3 4 5 6 7 NA

77. Often rushes into new situations.  
 1 2 3 4 5 6 7 NA

78. Tends to become sad if the family's plans don't work out.  
 1 2 3 4 5 6 7 NA

79. Likes being sung to.  
 1 2 3 4 5 6 7 NA

80. Seems to be at ease with almost any person.  
 1 2 3 4 5 6 7 NA

81. Is afraid of burglars or the "boogie man".  
 1 2 3 4 5 6 7 NA

**3 YEARS – PART 2**

|                  |              |                 |                         |               |            |                |                |
|------------------|--------------|-----------------|-------------------------|---------------|------------|----------------|----------------|
| 1                | 2            | 3               | 4                       | 5             | 6          | 7              | NA             |
| Extremely untrue | Quite untrue | Slightly untrue | Neither true nor untrue | Slightly true | Quite true | Extremely true | Not applicable |

**My child:**

82. Notices it when parents are wearing new clothing.

|   |   |   |   |   |   |   |    |
|---|---|---|---|---|---|---|----|
| 1 | 2 | 3 | 4 | 5 | 6 | 7 | NA |
|---|---|---|---|---|---|---|----|

83. Prefers quiet activities to active games.

|   |   |   |   |   |   |   |    |
|---|---|---|---|---|---|---|----|
| 1 | 2 | 3 | 4 | 5 | 6 | 7 | NA |
|---|---|---|---|---|---|---|----|

84. When angry about something, s/he tends to stay upset for ten minutes or longer.

|   |   |   |   |   |   |   |    |
|---|---|---|---|---|---|---|----|
| 1 | 2 | 3 | 4 | 5 | 6 | 7 | NA |
|---|---|---|---|---|---|---|----|

85. When building or putting something together, becomes very involved in what s/he is doing and works for long periods.

|   |   |   |   |   |   |   |    |
|---|---|---|---|---|---|---|----|
| 1 | 2 | 3 | 4 | 5 | 6 | 7 | NA |
|---|---|---|---|---|---|---|----|

86. Likes to go high and fast when pushed on a swing.

|   |   |   |   |   |   |   |    |
|---|---|---|---|---|---|---|----|
| 1 | 2 | 3 | 4 | 5 | 6 | 7 | NA |
|---|---|---|---|---|---|---|----|

87. Seems to feel depressed when unable to accomplish some task.

|   |   |   |   |   |   |   |    |
|---|---|---|---|---|---|---|----|
| 1 | 2 | 3 | 4 | 5 | 6 | 7 | NA |
|---|---|---|---|---|---|---|----|

88. Is good at following instructions.

|   |   |   |   |   |   |   |    |
|---|---|---|---|---|---|---|----|
| 1 | 2 | 3 | 4 | 5 | 6 | 7 | NA |
|---|---|---|---|---|---|---|----|

89. Takes a long time in approaching new situations.

|   |   |   |   |   |   |   |    |
|---|---|---|---|---|---|---|----|
| 1 | 2 | 3 | 4 | 5 | 6 | 7 | NA |
|---|---|---|---|---|---|---|----|

90. Hardly ever complains when ill with a cold.

|   |   |   |   |   |   |   |    |
|---|---|---|---|---|---|---|----|
| 1 | 2 | 3 | 4 | 5 | 6 | 7 | NA |
|---|---|---|---|---|---|---|----|

91. Likes the sound of words, such as nursery rhymes.

|   |   |   |   |   |   |   |    |
|---|---|---|---|---|---|---|----|
| 1 | 2 | 3 | 4 | 5 | 6 | 7 | NA |
|---|---|---|---|---|---|---|----|

92. Is sometimes shy even around people s/he has known a long time.

|   |   |   |   |   |   |   |    |
|---|---|---|---|---|---|---|----|
| 1 | 2 | 3 | 4 | 5 | 6 | 7 | NA |
|---|---|---|---|---|---|---|----|

**3 YEARS – PART 2**

|                  |              |                 |                         |               |            |                |                |
|------------------|--------------|-----------------|-------------------------|---------------|------------|----------------|----------------|
| 1                | 2            | 3               | 4                       | 5             | 6          | 7              | NA             |
| Extremely untrue | Quite untrue | Slightly untrue | Neither true nor untrue | Slightly true | Quite true | Extremely true | Not applicable |

**My child:**

93. Is very difficult to soothe when s/he has become upset.

1 2 3 4 5 6 7 NA

94. Is quickly aware of some new item in the living room.

1 2 3 4 5 6 7 NA

95. Is full of energy, even in the evening.

1 2 3 4 5 6 7 NA

96. Is not afraid of the dark.

1 2 3 4 5 6 7 NA

97. Sometimes becomes absorbed in a picture book and looks at it for a long time.

1 2 3 4 5 6 7 NA

98. Likes rough and rowdy games.

1 2 3 4 5 6 7 NA

99. Is not very upset at minor cuts or bruises.

1 2 3 4 5 6 7 NA

100. Approaches places s/he has been told are dangerous slowly and cautiously.

1 2 3 4 5 6 7 NA

101. Is slow and unhurried in deciding what to do next.

1 2 3 4 5 6 7 NA

102. Gets angry when s/he can't find something s/he wants to play with.

1 2 3 4 5 6 7 NA

103. Enjoys gentle rhythmic activities such as rocking or swaying.

1 2 3 4 5 6 7 NA

PID:

|  |  |   |  |  |  |
|--|--|---|--|--|--|
|  |  | - |  |  |  |
|--|--|---|--|--|--|

Mother's Date of Birth:

|      |  |  |  |       |  |     |  |
|------|--|--|--|-------|--|-----|--|
|      |  |  |  |       |  |     |  |
| year |  |  |  | month |  | day |  |

**3 YEARS – PART 2**

---

|                     |                 |                    |                           |                  |               |                   |                   |
|---------------------|-----------------|--------------------|---------------------------|------------------|---------------|-------------------|-------------------|
| 1                   | 2               | 3                  | 4                         | 5                | 6             | 7                 | NA                |
| Extremely<br>untrue | Quite<br>untrue | Slightly<br>untrue | Neither true<br>nor false | Slightly<br>true | Quite<br>true | Extremely<br>true | Not<br>applicable |

**My child:**

104. Sometimes turns away shyly from new acquaintances.

1      2      3      4      5      6      7      NA

105. Becomes upset when loved relatives or friends are getting ready to leave following a visit.

1      2      3      4      5      6      7      NA

106. Comments when a parent has changed his/her appearance.

1      2      3      4      5      6      7      NA

**3 YEARS – PART 2**

107. Have you, your child's father, or your other child/children (if applicable) experienced any of the following:

|                                             | <u>Yourself</u>          |                          |                          | <u>Father of Child</u>   |                          |                          | <u>Other child/children</u> <input type="checkbox"/> N/A |                          |                          |
|---------------------------------------------|--------------------------|--------------------------|--------------------------|--------------------------|--------------------------|--------------------------|----------------------------------------------------------|--------------------------|--------------------------|
|                                             | No                       | Yes                      | Unknown                  | No                       | Yes                      | Unknown                  | No                                                       | Yes                      | Unknown                  |
| Inflammatory Bowel Disease                  | <input type="checkbox"/> | <input type="checkbox"/> | <input type="checkbox"/> | <input type="checkbox"/> | <input type="checkbox"/> | <input type="checkbox"/> | <input type="checkbox"/>                                 | <input type="checkbox"/> | <input type="checkbox"/> |
| Autoimmune Disease                          | <input type="checkbox"/> | <input type="checkbox"/> | <input type="checkbox"/> | <input type="checkbox"/> | <input type="checkbox"/> | <input type="checkbox"/> | <input type="checkbox"/>                                 | <input type="checkbox"/> | <input type="checkbox"/> |
| Depression (only since your child was born) | <input type="checkbox"/> | <input type="checkbox"/> | <input type="checkbox"/> | <input type="checkbox"/> | <input type="checkbox"/> | <input type="checkbox"/> | <input type="checkbox"/>                                 | <input type="checkbox"/> | <input type="checkbox"/> |

108. What is your annual household income?

- Less than \$25,000
- \$25,000 to \$49,999
- \$50,000 to \$74,999
- \$75,000 to \$99,999
- \$100,000 to \$124,999
- \$125,000 or more

109. What is the highest level of education that **you** have completed?

- Elementary school
- High school / secondary school
- College diploma
- Postsecondary apprenticeship or training certificate
- University undergraduate degree
- Graduate degree
- Postgraduate degree

110. If you were to join a similar study in the future, how would you like to be reminded to collect diaper samples?

- Email
- Telephone call
- Cell phone text message
- By my midwife, doctor or other care provider
- I wouldn't like to be reminded

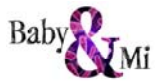

PID:

|  |  |   |  |  |  |
|--|--|---|--|--|--|
|  |  | - |  |  |  |
|--|--|---|--|--|--|

Mother's Date of Birth:

|  |  |  |  |
|--|--|--|--|
|  |  |  |  |
|--|--|--|--|

year

|  |  |
|--|--|
|  |  |
|--|--|

month

|  |  |
|--|--|
|  |  |
|--|--|

day

**3 YEARS – PART 2**

---

111. What did you find to be the most challenging throughout your participation in this study?

---

---

---

112. What did you enjoy the most about participating in this study?

---

---

---

113. Would you choose to participate in a similar study, if you were invited to do so in the future?

- No
- Yes

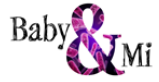

PID:   -

Mother's Date of Birth:          
year month day

**VACCINATION RECORD**

| Vaccination Date<br>YYYY / MM / DD | DTAP - Diphtheria, Tetanus, Pertussis | IPV - Injected Polio Vaccine | OPV - Oral Polio Vaccine | HIB - Haemophilus influenzae type B | Pneumococcal | Rotavirus | Meningococcal | MMR - Mumps, Measles, Rubella | Varicella | Influenza | Other #1 | Other #2 | Other #3 | Other #4 | Other #5 |
|------------------------------------|---------------------------------------|------------------------------|--------------------------|-------------------------------------|--------------|-----------|---------------|-------------------------------|-----------|-----------|----------|----------|----------|----------|----------|
| ____ / ____ / ____                 |                                       |                              |                          |                                     |              |           |               |                               |           |           |          |          |          |          |          |
| ____ / ____ / ____                 |                                       |                              |                          |                                     |              |           |               |                               |           |           |          |          |          |          |          |
| ____ / ____ / ____                 |                                       |                              |                          |                                     |              |           |               |                               |           |           |          |          |          |          |          |
| ____ / ____ / ____                 |                                       |                              |                          |                                     |              |           |               |                               |           |           |          |          |          |          |          |
| ____ / ____ / ____                 |                                       |                              |                          |                                     |              |           |               |                               |           |           |          |          |          |          |          |
| ____ / ____ / ____                 |                                       |                              |                          |                                     |              |           |               |                               |           |           |          |          |          |          |          |
| ____ / ____ / ____                 |                                       |                              |                          |                                     |              |           |               |                               |           |           |          |          |          |          |          |
| ____ / ____ / ____                 |                                       |                              |                          |                                     |              |           |               |                               |           |           |          |          |          |          |          |
| ____ / ____ / ____                 |                                       |                              |                          |                                     |              |           |               |                               |           |           |          |          |          |          |          |
| ____ / ____ / ____                 |                                       |                              |                          |                                     |              |           |               |                               |           |           |          |          |          |          |          |
| ____ / ____ / ____                 |                                       |                              |                          |                                     |              |           |               |                               |           |           |          |          |          |          |          |
| ____ / ____ / ____                 |                                       |                              |                          |                                     |              |           |               |                               |           |           |          |          |          |          |          |
| ____ / ____ / ____                 |                                       |                              |                          |                                     |              |           |               |                               |           |           |          |          |          |          |          |
| ____ / ____ / ____                 |                                       |                              |                          |                                     |              |           |               |                               |           |           |          |          |          |          |          |
| ____ / ____ / ____                 |                                       |                              |                          |                                     |              |           |               |                               |           |           |          |          |          |          |          |
| ____ / ____ / ____                 |                                       |                              |                          |                                     |              |           |               |                               |           |           |          |          |          |          |          |
| ____ / ____ / ____                 |                                       |                              |                          |                                     |              |           |               |                               |           |           |          |          |          |          |          |
| ____ / ____ / ____                 |                                       |                              |                          |                                     |              |           |               |                               |           |           |          |          |          |          |          |
